# Supplementary material
Source: publisher figshare collection journal article supplement (https://gsapubs.figshare.com/ndownloader/files/23316710)
Supplement: Supplementary file 1 [file 23316710]

## Sheet: Sheet1
Chapman, A.D., and Laskowski, A.K., 2019, Detrital zircon U-Pb data reveal a Mississippian sediment dispersal network originating in the Appalachian orogen, traversing North America along its southern shelf, and reaching as far as the southwest USA: Lithosphere, https://doi.org/10.1130/L1068.1.
GSA Data Repository Item 2019260
Sample 13MO2 - Upper Ordovician St. Peter Sandstone
							Isotope ratios						Apparent ages (Ma)
Analysis	U	206Pb	U/Th	206Pb*	±	207Pb*	±	206Pb*	±	error	206Pb*	±	207Pb*	±	206Pb*	±	Best age	±	Conc
	(ppm)	204Pb		207Pb*	(%)	235U*	(%)	238U	(%)	corr.	238U*	(Ma)	235U	(Ma)	207Pb*	(Ma)	(Ma)	(Ma)	(%)
13MO2-15	48.2242	30922.6	1.74011	13.561	2.82943	1.84756	2.93436	0.181714	0.777659	0.265019	1076.33	7.70873	1062.56	19.334	1034.37	57.1605	1034.37	57.1605	104.057
13MO2-102	64.7286	35601.2	1.47396	13.3806	1.18988	1.90285	1.61999	0.184663	1.09934	0.678611	1092.4	11.0468	1082.09	10.783	1061.4	23.9503	1061.4	23.9503	102.92
13MO2-77	124.859	66038.7	1.49771	13.3735	1.11794	1.8929	1.35008	0.183599	0.75691	0.560641	1086.61	7.56882	1078.6	8.97003	1062.47	22.5099	1062.47	22.5099	102.271
13MO2-36	92.4203	89679.7	1.42711	13.3708	1.17864	1.88099	1.59016	0.182408	1.06744	0.671278	1080.11	10.6155	1074.41	10.5422	1062.87	23.7264	1062.87	23.7264	101.622
13MO2-88	63.6797	38184.8	1.50932	13.3629	1.7805	1.87906	2.00588	0.182113	0.923775	0.460535	1078.51	9.17417	1073.73	13.2938	1064.07	35.8268	1064.07	35.8268	101.357
13MO2-49	63.1755	35402.6	1.84446	13.3541	1.37085	1.82222	1.59999	0.176488	0.825076	0.515676	1047.76	7.97884	1053.49	10.4899	1065.39	27.5663	1065.39	27.5663	98.3451
13MO2-6	74.0332	45327.8	1.83533	13.3266	1.02585	1.89979	1.3957	0.183621	0.946365	0.67806	1086.72	9.46425	1081.01	9.28478	1069.54	20.6022	1069.54	20.6022	101.607
13MO2-4	70.5858	39566.8	0.708037	13.2795	1.18923	1.87651	1.40363	0.18073	0.745579	0.53118	1070.96	7.35686	1072.83	9.29777	1076.65	23.8652	1076.65	23.8652	99.4721
13MO2-9	204.495	98051.1	1.99996	13.2698	0.628071	1.92165	0.89375	0.184943	0.635858	0.71145	1093.92	6.39762	1088.64	5.96893	1078.1	12.5865	1078.1	12.5865	101.468
13MO2-41	230.628	136844	1.38792	13.2554	0.528647	1.92857	0.862546	0.185408	0.681556	0.790167	1096.45	6.87196	1091.05	5.76763	1080.29	10.5868	1080.29	10.5868	101.496
13MO2-73	114.102	70104.2	1.27375	13.251	0.811727	1.93373	1.27483	0.185842	0.983	0.771083	1098.81	9.93089	1092.83	8.53233	1080.93	16.2848	1080.93	16.2848	101.654
13MO2-40	161.027	21322	0.932521	13.2288	0.923332	1.91838	1.14074	0.184058	0.669879	0.587234	1089.1	6.71268	1087.5	7.61406	1084.32	18.4969	1084.32	18.4969	100.441
13MO2-10	52.86	47760.1	1.64588	13.2153	1.89811	1.93101	2.27803	0.18508	1.2596	0.552935	1094.67	12.6813	1091.89	15.2401	1086.36	38.0448	1086.36	38.0448	100.764
13MO2-79	46.544	16716.7	0.91971	13.1514	2.64749	1.89726	2.90504	0.180966	1.19585	0.411646	1072.25	11.8128	1080.13	19.3185	1096.06	53.0183	1096.06	53.0183	97.8278
13MO2-54	49.4009	47429.2	0.814676	13.1102	2.41916	1.99239	2.56365	0.189444	0.848514	0.330979	1118.36	8.71194	1112.93	17.3336	1102.36	48.3686	1102.36	48.3686	101.452
13MO2-20	53.4113	40029	1.54667	13.061	2.60436	1.91899	3.88658	0.18178	2.88492	0.742278	1076.69	28.6065	1087.72	25.9497	1109.84	52.0141	1109.84	52.0141	97.0135
13MO2-60	59.0922	54420.5	1.87403	13.059	2.38276	2.04584	2.87914	0.193767	1.61613	0.561326	1141.75	16.9105	1130.91	19.6386	1110.14	47.583	1110.14	47.583	102.847
13MO2-94	121.123	54846.9	1.52115	12.9025	1.08236	2.07302	1.41006	0.193988	0.90375	0.640932	1142.94	9.46545	1139.93	9.65867	1134.18	21.5432	1134.18	21.5432	100.772
13MO2-87	84.031	97085.9	3.91064	12.6975	2.19736	2.18494	2.29263	0.201213	0.654031	0.285275	1181.83	7.06241	1176.25	15.9712	1165.98	43.5274	1165.98	43.5274	101.359
13MO2-83	165.625	5841.02	1.84784	12.6156	1.02281	2.11569	1.26406	0.193578	0.742768	0.587606	1140.73	7.76564	1153.93	8.71576	1178.83	20.2365	1178.83	20.2365	96.7677
13MO2-2	173.325	12120.8	1.73449	12.1936	0.522439	2.38454	1.09757	0.21088	0.965255	0.879447	1233.5	10.8366	1237.97	7.85192	1245.78	10.2315	1245.78	10.2315	99.0146
13MO2-99	78.1261	60867	1.40693	12.094	1.02231	2.52535	1.58433	0.221509	1.21037	0.763962	1289.84	14.1492	1279.36	11.5243	1261.79	19.9573	1261.79	19.9573	102.224
13MO2-69	183.559	300625	2.03737	11.5579	0.448207	2.83254	0.840508	0.237439	0.71103	0.845953	1373.37	8.79497	1364.19	6.30763	1349.84	8.64998	1349.84	8.64998	101.743
13MO2-11	101.197	55456.1	0.830543	10.8134	1.00221	3.30037	2.95159	0.258835	2.77622	0.940588	1483.88	36.7986	1481.14	23.0047	1477.2	19.0079	1477.2	19.0079	100.452
13MO2-74	85.161	64701	1.17921	10.7411	0.956674	3.29163	2.96086	0.256423	2.80205	0.946363	1471.52	36.8655	1479.08	23.0628	1489.92	18.1133	1489.92	18.1133	98.7647
13MO2-29	63.1501	66311.9	0.87419	8.93954	0.841691	5.10286	1.17906	0.330848	0.82567	0.70028	1842.49	13.232	1836.58	10.0106	1829.88	15.2572	1829.88	15.2572	100.689
13MO2-89	86.545	89196.8	2.06821	8.90515	0.686581	5.15143	1.10939	0.332711	0.871407	0.785484	1851.51	14.024	1844.63	9.43361	1836.86	12.4364	1836.86	12.4364	100.797
13MO2-91	153.877	179816	3.59715	8.90189	0.390864	5.14268	0.684536	0.332025	0.561974	0.820957	1848.19	9.03011	1843.19	5.81919	1837.53	7.07927	1837.53	7.07927	100.58
13MO2-22	111.203	206721	0.424988	8.88294	0.637211	5.19165	0.782717	0.334473	0.454542	0.580723	1860.02	7.34418	1851.25	6.66408	1841.39	11.5357	1841.39	11.5357	101.012
13MO2-26	135.074	196078	0.340447	8.79794	0.474838	5.31685	0.881374	0.339261	0.742529	0.842468	1883.11	12.1255	1871.57	7.53272	1858.77	8.57625	1858.77	8.57625	101.31
13MO2-67	94.7259	143805	1.75826	8.7327	0.328647	5.33183	0.609086	0.337694	0.512813	0.841939	1875.57	8.34534	1873.98	5.20786	1872.2	5.9275	1872.2	5.9275	100.18
13MO2-64	117.781	110689	0.851118	6.39831	1.34679	9.85639	1.68754	0.457385	1.01683	0.602553	2428	20.572	2421.44	15.5579	2415.92	22.8652	2415.92	22.8652	100.5
13MO2-92	30.6442	74175.4	3.80577	5.68391	0.678067	12.0612	1.39162	0.497206	1.21525	0.873262	2601.78	26.016	2609.17	13.0491	2614.91	11.288	2614.91	11.288	99.4979
13MO2-23	74.6306	97749.7	0.482087	5.54772	0.165136	12.794	1.47854	0.514777	1.46929	0.993743	2676.99	32.1884	2664.6	13.9253	2655.2	2.73851	2655.2	2.73851	100.821
13MO2-34	180.487	20654.8	1.28807	5.4953	0.348582	12.7979	0.887438	0.510069	0.81611	0.919626	2656.92	17.7705	2664.89	8.35802	2670.93	5.77196	2670.93	5.77196	99.4756
13MO2-50	95.3131	196289	1.9827	5.48279	0.203029	13.1164	0.767066	0.521575	0.739709	0.964336	2705.86	16.3457	2688.06	7.23704	2674.7	3.36061	2674.7	3.36061	101.165
13MO2-84	163.468	413775	3.25439	5.47551	0.11767	13.184	0.75931	0.523565	0.750137	0.987919	2714.28	16.6176	2692.91	7.16646	2676.9	1.9473	2676.9	1.9473	101.396
13MO2-86	161.832	276339	0.744373	5.47396	0.146128	12.9921	0.54815	0.5158	0.528313	0.963812	2681.34	11.5891	2679.08	5.16808	2677.37	2.41814	2677.37	2.41814	100.148
13MO2-59	76.0217	134838	0.806026	5.4731	0.233085	13.1501	0.778532	0.521987	0.742822	0.954131	2707.6	16.423	2690.48	7.34655	2677.63	3.85703	2677.63	3.85703	101.119
13MO2-12	161.994	187062	1.45502	5.44606	0.121256	13.32	0.949173	0.526119	0.941396	0.991807	2725.08	20.9213	2702.6	8.96494	2685.82	2.00495	2685.82	2.00495	101.462
13MO2-68	45.5962	114111	1.00436	5.42622	0.501904	13.2773	0.794184	0.522523	0.615484	0.774989	2709.87	13.6169	2699.57	7.49933	2691.85	8.29126	2691.85	8.29126	100.67
13MO2-72	172.758	231324	1.92075	5.4256	0.217924	13.2775	0.522111	0.522473	0.474457	0.908728	2709.66	10.4961	2699.59	4.93016	2692.04	3.60144	2692.04	3.60144	100.655
13MO2-39	102.375	152066	0.886705	5.42302	0.164527	13.3945	0.590946	0.526825	0.567581	0.960462	2728.06	12.6248	2707.87	5.58357	2692.82	2.71879	2692.82	2.71879	101.309
13MO2-70	103.439	271181	1.07085	5.41998	0.273286	13.3489	0.532147	0.524738	0.456612	0.858057	2719.24	10.1301	2704.65	5.0268	2693.75	4.51564	2693.75	4.51564	100.946
13MO2-93	39.0376	95859.9	0.438112	5.40993	0.472645	13.2596	1.11839	0.520262	1.01361	0.90631	2700.29	22.3611	2698.31	10.5599	2696.82	7.80748	2696.82	7.80748	100.129
13MO2-58	61.1679	82920.2	0.897447	5.40552	0.378324	13.4357	0.67235	0.526742	0.55581	0.826669	2727.71	12.3617	2710.77	6.35409	2698.16	6.2486	2698.16	6.2486	101.095
13MO2-95	29.0684	37350.4	0.826397	5.4007	0.503465	13.2807	1.1443	0.5202	1.02759	0.898009	2700.03	22.6678	2699.81	10.8058	2699.64	8.31436	2699.64	8.31436	100.015
13MO2-31	66.4163	124248	0.937781	5.39851	0.323894	13.302	1.24987	0.520824	1.20717	0.965839	2702.67	26.6503	2701.33	11.8041	2700.3	5.34852	2700.3	5.34852	100.088
13MO2-81	79.1964	120095	1.15155	5.39817	0.279188	13.6255	0.682922	0.533456	0.623246	0.912618	2756	13.9767	2724.04	6.46024	2700.41	4.61023	2700.41	4.61023	102.058
13MO2-104	89.3078	107343	0.645611	5.39577	0.290136	13.6554	0.825667	0.534387	0.773012	0.936227	2759.91	17.3551	2726.11	7.81178	2701.14	4.79068	2701.14	4.79068	102.176
13MO2-38	13.7566	24016.9	1.01907	5.3952	1.0343	13.4031	1.4174	0.524459	0.969146	0.683749	2718.06	21.4934	2708.48	13.3936	2701.32	17.0749	2701.32	17.0749	100.62
13MO2-82	34.9765	68301.4	1.0219	5.39382	0.595323	13.3638	0.937476	0.522787	0.72419	0.772489	2710.99	16.0272	2705.7	8.85649	2701.74	9.82939	2701.74	9.82939	100.342
13MO2-48	84.603	160640	0.976233	5.38755	0.202867	13.7123	1.69092	0.535798	1.67871	0.992777	2765.83	37.7542	2730.05	16.0037	2703.66	3.3489	2703.66	3.3489	102.3
13MO2-52	85.6408	171121	0.809186	5.38494	0.200931	13.5458	1.13157	0.529033	1.11359	0.984108	2737.38	24.8376	2718.49	10.7002	2704.46	3.31669	2704.46	3.31669	101.217
13MO2-47	112.771	207194	0.706112	5.38137	0.170873	13.4215	0.794659	0.523832	0.77607	0.976608	2715.41	17.1979	2709.77	7.50947	2705.56	2.82024	2705.56	2.82024	100.364
13MO2-78	121.629	334779	1.58859	5.37805	0.136845	13.4584	0.620269	0.524947	0.604986	0.975359	2720.13	13.4253	2712.36	5.86257	2706.57	2.2584	2706.57	2.2584	100.501
13MO2-65	122.749	356137	0.56935	5.37364	0.190555	13.5608	0.545441	0.528508	0.511073	0.936989	2735.16	11.3916	2719.53	5.15801	2707.93	3.14438	2707.93	3.14438	101.006
13MO2-28	89.1894	207810	0.873338	5.37332	0.263427	13.6003	0.799734	0.530017	0.755103	0.944193	2741.52	16.8624	2722.28	7.56432	2708.03	4.34683	2708.03	4.34683	101.237
13MO2-57	40.2655	106344	1.58691	5.37011	0.224662	13.6524	1.71754	0.531728	1.70279	0.991408	2748.73	38.1059	2725.9	16.2508	2709.01	3.7068	2709.01	3.7068	101.466
13MO2-46	176.923	205649	0.986275	5.36914	0.142396	13.507	0.874567	0.525972	0.862897	0.986656	2724.46	19.1732	2715.78	8.26826	2709.31	2.34939	2709.31	2.34939	100.559
13MO2-1	63.167	111781	0.680306	5.36533	0.396666	13.5974	0.744029	0.529117	0.629471	0.846031	2737.73	14.0413	2722.08	7.03731	2710.48	6.5439	2710.48	6.5439	101.005
13MO2-51	146.413	179354	1.2284	5.36438	0.128605	13.6732	0.376241	0.531969	0.353579	0.939767	2749.74	7.91482	2727.34	3.55994	2710.78	2.12157	2710.78	2.12157	101.438
13MO2-75	105.994	62683.8	0.714568	5.36407	0.17244	13.6128	0.429015	0.529592	0.392833	0.915664	2739.73	8.76784	2723.15	4.05806	2710.87	2.84466	2710.87	2.84466	101.065
13MO2-32	72.3982	107180	0.882239	5.36317	0.257163	13.5879	0.674418	0.528533	0.623464	0.924447	2735.27	13.8972	2721.42	6.37859	2711.15	4.2422	2711.15	4.2422	100.89
13MO2-61	48.3694	69650.7	0.737164	5.36145	0.495364	13.4976	0.811353	0.524853	0.642579	0.791984	2719.73	14.2579	2715.12	7.67023	2711.67	8.17124	2711.67	8.17124	100.297
13MO2-55	38.3822	102169	0.41023	5.3608	0.556099	13.5465	0.873509	0.526691	0.673626	0.771173	2727.49	14.9811	2718.54	8.25992	2711.88	9.17293	2711.88	9.17293	100.576
13MO2-24	112.559	258535	0.576908	5.35964	0.172303	13.6278	0.642382	0.529737	0.618843	0.963356	2740.34	13.8147	2724.2	6.07681	2712.23	2.84204	2712.23	2.84204	101.037
13MO2-7	79.256	48339.7	1.12074	5.35926	0.263862	13.7796	1.01657	0.5356	0.98173	0.965727	2765	22.0737	2734.68	9.62398	2712.35	4.35221	2712.35	4.35221	101.941
13MO2-35	48.4054	145021	0.73502	5.3585	0.450288	13.4493	3.05877	0.522687	3.02544	0.989105	2710.57	66.9506	2711.73	28.9166	2712.58	7.42704	2712.58	7.42704	99.9257
13MO2-37	57.8332	100196	1.88812	5.35784	0.239529	13.7065	0.932646	0.532618	0.901363	0.966457	2752.47	20.193	2729.65	8.82622	2712.79	3.95069	2712.79	3.95069	101.463
13MO2-62	56.1737	10256.1	1.12287	5.35324	0.685886	13.5081	1.95041	0.524456	1.82583	0.936127	2718.05	40.4929	2715.85	18.4411	2714.2	11.3113	2714.2	11.3113	100.142
13MO2-21	44.0504	130224	0.906593	5.34163	0.404794	13.7368	1.06676	0.532179	0.986976	0.925208	2750.63	22.0991	2731.73	10.097	2717.78	6.67338	2717.78	6.67338	101.208
13MO2-33	74.4731	199589	0.702554	5.34005	0.252919	13.721	0.927635	0.531409	0.892491	0.962113	2747.39	19.9646	2730.64	8.77943	2718.27	4.16939	2718.27	4.16939	101.071
13MO2-42	47.3226	125607	0.908556	5.33976	0.195275	13.6615	0.999871	0.529076	0.980617	0.980743	2737.56	21.873	2726.53	9.46033	2718.36	3.2191	2718.36	3.2191	100.706
13MO2-3	69.2279	13855.5	0.841767	5.33869	0.327922	12.8588	0.800263	0.497891	0.729992	0.91219	2604.73	15.642	2669.36	7.53955	2718.69	5.40561	2718.69	5.40561	95.8081
13MO2-85	59.133	48783.7	2.71967	5.33673	0.333807	13.8095	0.91863	0.534506	0.855836	0.931643	2760.41	19.2174	2736.73	8.69799	2719.3	5.50231	2719.3	5.50231	101.512
13MO2-53	96.2895	228303	0.657167	5.33498	0.131506	13.704	0.508923	0.530246	0.491639	0.966038	2742.49	10.982	2729.47	4.81612	2719.84	2.16756	2719.84	2.16756	100.833
13MO2-76	37.8786	9770.7	0.744042	5.33166	1.28169	13.3021	2.72431	0.514375	2.40399	0.88242	2675.28	52.6389	2701.33	25.7336	2720.86	21.1213	2720.86	21.1213	98.3248
13MO2-56	23.9104	35550.6	0.844519	5.32933	1.10917	13.5463	1.79764	0.52359	1.41466	0.786952	2714.39	31.3398	2718.52	16.9997	2721.58	18.2764	2721.58	18.2764	99.7356
13MO2-25	105.098	149648	1.07271	5.32875	0.134624	13.8001	1.24497	0.533342	1.23767	0.994136	2755.52	27.7518	2736.09	11.7876	2721.76	2.21854	2721.76	2.21854	101.24
13MO2-90	32.4093	77435.2	1.77274	5.32799	0.629091	13.2759	3.36108	0.513009	3.30169	0.982328	2669.46	72.1698	2699.47	31.7476	2722	10.3671	2722	10.3671	98.0701
13MO2-19	56.6232	142812	2.14298	5.32489	0.255992	13.5687	2.93899	0.524021	2.92782	0.996199	2716.21	64.8986	2720.09	27.8006	2722.96	4.21818	2722.96	4.21818	99.7523
13MO2-63	72.8615	61219.1	1.57823	5.32154	0.569511	13.6095	2.16881	0.525263	2.0927	0.964907	2721.46	46.4584	2722.92	20.5171	2723.99	9.38343	2723.99	9.38343	99.9071
13MO2-71	63.9146	131333	2.76871	5.31883	0.268372	13.8434	1.03336	0.534019	0.997907	0.965688	2758.36	22.3942	2739.05	9.78602	2724.83	4.42139	2724.83	4.42139	101.231
13MO2-18	50.8253	175015	1.00352	5.31287	0.383937	13.7134	3.24582	0.528413	3.22303	0.99298	2734.76	71.8346	2730.12	30.7269	2726.68	6.32422	2726.68	6.32422	100.296
13MO2-30	76.2994	75716.7	0.877952	5.30832	0.294494	13.7928	0.856296	0.531016	0.804062	0.939	2745.73	17.9778	2735.58	8.10709	2728.09	4.85026	2728.09	4.85026	100.647
13MO2-103	169.627	176343	1.44716	5.30344	0.138456	13.7929	0.995891	0.530533	0.986219	0.990289	2743.7	22.0375	2735.59	9.4288	2729.61	2.28001	2729.61	2.28001	100.516
13MO2-97	58.1845	85572	1.08456	5.29788	0.264815	13.875	0.787815	0.533131	0.741974	0.941813	2754.63	16.6327	2741.21	7.4617	2731.33	4.35671	2731.33	4.35671	100.853
13MO2-98	37.6664	103656	1.84441	5.28414	0.340954	14.0171	1.08037	0.537196	1.02516	0.948896	2771.7	23.0948	2750.87	10.2397	2735.6	5.60828	2735.6	5.60828	101.32
13MO2-100	86.5011	185317	0.906738	5.27369	0.323516	14.0571	0.89892	0.537661	0.838686	0.932993	2773.65	18.9046	2753.57	8.52149	2738.86	5.31975	2738.86	5.31975	101.27
13MO2-96	18.5218	44968	1.57553	5.2711	0.751657	13.9725	1.10003	0.534162	0.803173	0.730135	2758.96	18.0273	2747.84	10.4239	2739.67	12.3635	2739.67	12.3635	100.704
13MO2-17	87.1851	196510	2.14291	5.26966	0.203334	13.9759	0.694146	0.534146	0.663697	0.956135	2758.9	14.8964	2748.07	6.57769	2740.12	3.34532	2740.12	3.34532	100.685
13MO2-5	45.3815	68728.3	1.2599	5.26921	0.482802	14.6513	2.65124	0.559914	2.60691	0.983279	2866.27	60.3222	2792.87	25.2054	2740.25	7.93965	2740.25	7.93965	104.599
13MO2-27	54.3722	149246	1.09367	5.25278	0.422886	14.0675	1.06765	0.535926	0.980331	0.918212	2766.37	22.051	2754.27	10.1216	2745.39	6.95406	2745.39	6.95406	100.764
13MO2-80	48.6002	100437	1.15252	5.24975	0.279006	13.7377	0.720203	0.523059	0.663963	0.921912	2712.14	14.6993	2731.8	6.81672	2746.34	4.58764	2746.34	4.58764	98.7547
13MO2-105	28.9833	84771.3	2.2721	5.24181	0.534892	14.196	1.15284	0.539692	1.02123	0.885846	2782.16	23.0758	2762.89	10.9358	2748.83	8.79311	2748.83	8.79311	101.213
13MO2-43	107.987	238629	3.13779	5.23752	0.232778	14.2753	0.936306	0.542261	0.906909	0.968603	2792.91	20.5558	2768.17	8.88494	2750.18	3.82613	2750.18	3.82613	101.554
13MO2-45	118.676	207464	1.75417	5.15672	4.91715	13.5906	5.50868	0.508288	2.48338	0.450812	2649.32	53.9507	2721.61	52.1464	2775.7	80.6764	2775.7	80.6764	95.4468
13MO2-16	90.8038	277892	0.897427	5.1104	0.177904	14.8334	0.78936	0.549785	0.769051	0.974272	2824.28	17.5872	2804.61	7.50895	2790.48	2.91346	2790.48	2.91346	101.211
13MO2-101	31.0519	68384.8	0.92079	5.07166	0.623306	15.2127	1.40474	0.559572	1.25888	0.896167	2864.86	29.1177	2828.65	13.3845	2802.94	10.196	2802.94	10.196	102.209
13MO2-44	34.5299	10969.8	1.25668	4.76504	0.847734	16.385	1.1018	0.566253	0.703776	0.638754	2892.42	16.4022	2899.53	10.5443	2904.46	13.7425	2904.46	13.7425	99.5852
13MO2-13	74.3219	131504	2.31742	4.56867	0.0983579	17.7173	0.665987	0.587064	0.658684	0.989034	2977.51	15.7068	2974.51	6.40112	2972.48	1.58502	2972.48	1.58502	100.169
13MO2-8	51.0141	111268	0.562687	4.19059	0.580122	20.4451	1.15964	0.621388	1.0041	0.865875	3115.44	24.807	3112.65	11.2262	3110.84	9.24136	3110.84	9.24136	100.148
Sample 13OK1 - Upper Ordovician Oil Creek Sandstone
							Isotope ratios						Apparent ages (Ma)
Analysis	U	206Pb	U/Th	206Pb*	±	207Pb*	±	206Pb*	±	error	206Pb*	±	207Pb*	±	206Pb*	±	Best age	±	Conc
	(ppm)	204Pb		207Pb*	(%)	235U*	(%)	238U	(%)	corr.	238U*	(Ma)	235U	(Ma)	207Pb*	(Ma)	(Ma)	(Ma)	(%)
13OK1-1	24.4635	23573	2.66534	11.0695	2.63188	3.07839	2.76644	0.247145	0.852282	0.308079	1423.73	10.8877	1427.33	21.2055	1432.67	50.2237	1432.67	50.2237	99.3763
13OK1-2	139.131	282646	1.18304	5.32878	0.166014	13.6789	0.8488	0.52866	0.832407	0.980686	2735.8	18.5576	2727.73	8.0316	2721.75	2.73584	2721.75	2.73584	100.516
13OK1-3	14.0878	24062.7	1.19294	5.44095	1.41331	13.0045	1.91588	0.513176	1.29351	0.675152	2670.18	28.2793	2679.98	18.0664	2687.37	23.364	2687.37	23.364	99.36
13OK1-4	36.2213	72332.6	1.49502	5.30906	0.324405	13.718	0.818348	0.528209	0.751302	0.918071	2733.9	16.7401	2730.44	7.74495	2727.86	5.34302	2727.86	5.34302	100.221
13OK1-5	57.5042	95056	0.62624	5.70432	0.257984	11.9633	1.06654	0.494942	1.03487	0.970304	2592.02	22.0869	2601.54	9.99437	2608.94	4.2972	2608.94	4.2972	99.3516
13OK1-6	50.6274	59631.8	0.578047	5.40027	0.51407	13.3286	0.867722	0.522033	0.699052	0.805617	2707.8	15.4562	2703.21	8.19598	2699.77	8.48939	2699.77	8.48939	100.297
13OK1-9	44.8286	44834.2	0.958397	5.25303	0.652426	13.9526	1.60338	0.531575	1.46464	0.91347	2748.09	32.7703	2746.5	15.1928	2745.31	10.7254	2745.31	10.7254	100.101
13OK1-10	76.7108	109115	1.34042	5.32825	0.212642	13.3029	0.531032	0.514077	0.486598	0.916326	2674.01	10.6505	2701.39	5.01506	2721.92	3.50421	2721.92	3.50421	98.2401
13OK1-14	44.3068	80809.6	1.01012	5.3992	0.475876	13.4969	0.936686	0.52852	0.806798	0.861333	2735.21	17.9835	2715.07	8.85511	2700.1	7.85839	2700.1	7.85839	101.301
13OK1-15	112.051	128357	0.901738	5.48955	0.115597	13.0224	1.35346	0.518473	1.34851	0.996346	2692.7	29.6822	2681.28	12.7634	2672.66	1.91378	2672.66	1.91378	100.75
13OK1-16	40.8077	63394.4	1.48564	5.30494	0.555097	13.0909	3.93592	0.503674	3.89658	0.990005	2629.57	84.1438	2686.23	37.145	2729.14	9.13819	2729.14	9.13819	96.3515
13OK1-19	93.8463	101588	1.70395	8.86236	0.736055	5.17959	0.934695	0.332923	0.576088	0.616338	1852.53	9.27569	1849.27	7.95508	1845.58	13.3165	1845.58	13.3165	100.377
13OK1-20	27.6271	49409.1	0.97867	5.43602	0.673206	13.2544	1.12487	0.522566	0.901179	0.801141	2710.05	19.9386	2697.94	10.6208	2688.87	11.1253	2688.87	11.1253	100.788
13OK1-21	56.3086	155933	0.590278	5.28281	0.262795	13.9454	1.00945	0.534313	0.974641	0.965518	2759.6	21.8799	2746.01	9.56424	2736.02	4.32171	2736.02	4.32171	100.862
13OK1-22	46.1561	76581.3	0.805239	5.39512	0.377911	13.3954	1.0253	0.524149	0.953112	0.929594	2716.75	21.1296	2707.93	9.68781	2701.34	6.23989	2701.34	6.23989	100.57
13OK1-23	152.024	9881.04	1.46623	5.26358	0.249843	12.201	1.92881	0.465774	1.91256	0.991575	2465	39.1785	2619.99	18.1032	2742.01	4.10978	2742.01	4.10978	89.8976
13OK1-24	250.405	343901	1.99196	8.74195	0.289928	5.38802	0.847528	0.341614	0.796396	0.939669	1894.43	13.0724	1882.95	7.25863	1870.29	5.23037	1870.29	5.23037	101.29
13OK1-25	116.439	189719	1.95961	9.17273	0.370087	4.86856	1.56742	0.32389	1.5231	0.971726	1808.7	24.0212	1796.83	13.2041	1783.07	6.74602	1783.07	6.74602	101.438
13OK1-26	110.184	267704	0.91234	5.34285	0.211483	13.7709	0.818239	0.533624	0.790437	0.966022	2756.7	17.7297	2734.08	7.74594	2717.41	3.48659	2717.41	3.48659	101.446
13OK1-28	100.051	133789	3.4171	11.53	1.52099	2.68614	2.00959	0.224625	1.31341	0.653571	1306.27	15.5301	1324.65	14.8705	1354.48	29.3359	1354.48	29.3359	96.4402
13OK1-29	93.3162	118034	11.373	5.3738	0.232681	13.4711	0.971839	0.52503	0.943574	0.970915	2720.48	20.9412	2713.26	9.18624	2707.88	3.83953	2707.88	3.83953	100.465
13OK1-30	62.9675	66839.1	0.630676	11.02	1.67379	3.14766	1.87844	0.251575	0.852612	0.453894	1446.59	11.0479	1444.43	14.4757	1441.22	31.9005	1441.22	31.9005	100.373
13OK1-31	101.595	144639	2.09765	8.81333	0.441358	5.27094	1.30332	0.33692	1.22631	0.940916	1871.84	19.9225	1864.17	11.1238	1855.61	7.97445	1855.61	7.97445	100.874
13OK1-33	64.9788	160390	0.550908	5.42231	0.43233	13.3776	0.629467	0.526093	0.457515	0.726829	2724.97	10.1673	2706.68	5.94703	2693.04	7.14069	2693.04	7.14069	101.186
13OK1-34	40.0949	34673.3	1.30594	5.79712	0.719061	11.7233	0.912635	0.492902	0.562009	0.61581	2583.22	11.9617	2582.56	8.53861	2582.03	12.0084	2582.03	12.0084	100.046
13OK1-35	99.6321	121326	3.21311	8.7584	0.538885	5.28795	0.940674	0.3359	0.771019	0.819645	1866.92	12.4974	1866.92	8.0326	1866.9	9.72567	1866.9	9.72567	100.001
13OK1-36	22.4391	36667.1	2.76231	5.27078	1.04149	14.0454	1.29152	0.536918	0.763751	0.591359	2770.53	17.2	2752.78	12.2428	2739.77	17.1322	2739.77	17.1322	101.123
13OK1-37	72.3331	168605	2.02775	8.59258	0.775057	5.1003	1.36747	0.317847	1.12661	0.823867	1779.2	17.5164	1836.16	11.6094	1901.32	13.9286	1901.32	13.9286	93.5771
13OK1-38	28.7238	56149.8	1.62049	5.28676	0.684996	13.8579	1.4374	0.531356	1.26368	0.879146	2747.16	28.2662	2740.04	13.6136	2734.79	11.2717	2734.79	11.2717	100.452
13OK1-39	34.6802	117946	1.15822	5.25551	0.618705	13.9783	0.978053	0.532805	0.75749	0.774488	2753.26	16.9737	2748.24	9.26822	2744.54	10.1716	2744.54	10.1716	100.318
13OK1-40	25.0262	39951.1	0.727086	5.82051	0.422866	11.7836	1.22825	0.497437	1.15316	0.938866	2602.77	24.6945	2587.36	11.4964	2575.31	7.06651	2575.31	7.06651	101.066
13OK1-41	50.0945	86422.3	1.44365	5.29385	0.481058	14.0507	1.28404	0.539473	1.19052	0.927169	2781.24	26.8941	2753.14	12.1723	2732.58	7.91639	2732.58	7.91639	101.781
13OK1-42	113.341	167250	2.18396	5.33994	0.323948	13.7219	1.19752	0.531436	1.15287	0.962716	2747.5	25.7902	2730.71	11.334	2718.3	5.34029	2718.3	5.34029	101.074
13OK1-43	136.673	262875	0.861931	5.36253	0.171426	13.4178	0.988098	0.521855	0.973114	0.984835	2707.04	21.511	2709.51	9.33737	2711.34	2.82782	2711.34	2.82782	99.8414
13OK1-45	102.243	146603	1.37155	5.50692	0.169484	13.111	0.751616	0.523651	0.732258	0.974245	2714.65	16.2233	2687.67	7.09106	2667.43	2.80732	2667.43	2.80732	101.77
13OK1-46	24.8712	36234.9	0.707385	5.40156	0.694386	13.5765	0.99419	0.531869	0.711507	0.715665	2749.32	15.9251	2720.63	9.40257	2699.37	11.4643	2699.37	11.4643	101.85
13OK1-47	127.372	9787.48	0.444474	5.37592	0.349297	12.7177	2.20071	0.495862	2.17281	0.987324	2595.99	46.432	2658.97	20.7196	2707.23	5.76421	2707.23	5.76421	95.891
13OK1-49	58.367	105944	1.52577	5.28438	0.371548	13.9917	0.973018	0.536245	0.899287	0.924224	2767.71	20.2358	2749.15	9.22109	2735.52	6.11185	2735.52	6.11185	101.177
13OK1-50	149.585	229929	0.875876	5.36225	0.225919	13.6043	1.05982	0.529083	1.03546	0.977016	2737.59	23.0965	2722.57	10.0247	2711.43	3.7267	2711.43	3.7267	100.965
13OK1-51	83.0979	110894	0.579708	5.37012	0.311803	13.1679	0.715835	0.51286	0.644359	0.90015	2668.83	14.0814	2691.76	6.75554	2709.01	5.1446	2709.01	5.1446	98.5168
13OK1-52	97.3013	159963	0.617973	5.30184	0.166607	13.8751	0.847202	0.533534	0.830658	0.980473	2756.32	18.6299	2741.22	8.02421	2730.1	2.74347	2730.1	2.74347	100.961
13OK1-53	68.85	144651	5.16656	4.90466	0.201461	15.9372	0.884916	0.566916	0.861678	0.97374	2895.14	20.0973	2873.04	8.45497	2857.56	3.27932	2857.56	3.27932	101.315
13OK1-54	68.657	148616	2.18237	4.70505	0.17276	16.8813	0.696265	0.576061	0.674491	0.968728	2932.66	15.8925	2928.12	6.67448	2924.99	2.79542	2924.99	2.79542	100.262
13OK1-55	22.2567	33942.3	0.632899	5.59812	0.525255	12.6528	1.3673	0.513723	1.26239	0.923269	2672.5	27.6182	2654.16	12.8672	2640.2	8.71966	2640.2	8.71966	101.224
13OK1-56	51.1357	113073	195.971	5.33397	0.569286	13.5247	0.987689	0.52321	0.80712	0.81718	2712.78	17.872	2717.01	9.33862	2720.15	9.38312	2720.15	9.38312	99.7292
13OK1-57	28.6549	73655.5	1.03559	5.39385	0.999408	13.6281	3.04201	0.533132	2.87316	0.944492	2754.63	64.4091	2724.22	28.7842	2701.73	16.4981	2701.73	16.4981	101.958
13OK1-58	106.779	73397.4	1.0342	13.2667	1.12395	1.8944	1.4135	0.182277	0.857165	0.606412	1079.4	8.51912	1079.13	9.39403	1078.55	22.5381	1078.55	22.5381	100.079
13OK1-60	40.6804	68043.2	0.846402	5.79721	0.785351	11.8811	1.58977	0.499546	1.38225	0.869461	2611.85	29.684	2595.08	14.8902	2582	13.1155	2582	13.1155	101.156
13OK1-61	79.0186	176619	1.37652	5.33118	0.348572	13.601	2.02297	0.525888	1.99272	0.985043	2724.1	44.2733	2722.33	19.1364	2721.01	5.74475	2721.01	5.74475	100.114
13OK1-62	26.2327	27608.3	0.585485	5.38358	0.994437	13.3277	1.30734	0.520386	0.848671	0.649157	2700.82	18.7254	2703.15	12.3487	2704.88	16.4146	2704.88	16.4146	99.8498
13OK1-63	42.3314	93856.9	1.43665	5.27524	0.773056	13.6948	1.1545	0.52396	0.857467	0.742719	2715.95	19.0047	2728.84	10.9253	2738.37	12.7171	2738.37	12.7171	99.1812
13OK1-64	32.1761	34897.6	0.565984	5.31626	0.946954	13.9109	4.31125	0.536367	4.20597	0.975579	2768.22	94.6634	2743.66	40.8619	2725.63	15.5969	2725.63	15.5969	101.563
13OK1-65	46.4739	29968.3	1.27142	9.20159	1.66482	4.79925	1.84418	0.320284	0.793334	0.430182	1791.12	12.4063	1784.77	15.4978	1777.34	30.3765	1777.34	30.3765	100.775
13OK1-66	30.3843	36269.5	0.619186	5.43347	0.64171	13.2849	1.5208	0.523522	1.37878	0.906617	2714.1	30.5425	2700.11	14.3619	2689.64	10.6039	2689.64	10.6039	100.909
13OK1-67	96.4368	98498.5	0.8042	10.7415	0.676797	3.25762	1.11868	0.253783	0.890727	0.796229	1457.96	11.6226	1471	8.69122	1489.85	12.8142	1489.85	12.8142	97.8592
13OK1-68	60.6824	143330	0.754699	5.40968	0.563876	13.4206	1.10278	0.526552	0.947716	0.859389	2726.91	21.0731	2709.71	10.4213	2696.89	9.31113	2696.89	9.31113	101.113
13OK1-69	101.349	284336	1.72365	4.69009	0.20981	17.0714	0.803958	0.580697	0.776098	0.965346	2951.59	18.3796	2938.86	7.71168	2930.14	3.39338	2930.14	3.39338	100.732
13OK1-70	66.518	125382	1.24104	5.40761	0.256448	13.6623	0.665492	0.535833	0.614096	0.92277	2765.98	13.8115	2726.59	6.29651	2697.52	4.23589	2697.52	4.23589	102.538
13OK1-71	192.386	189524	0.974994	8.8525	0.319694	5.23857	0.679843	0.336339	0.599985	0.882535	1869.03	9.73464	1858.91	5.79657	1847.6	5.78315	1847.6	5.78315	101.16
13OK1-72	91.3565	87762.7	0.667297	5.30242	0.184488	13.7014	0.762462	0.526913	0.739806	0.970285	2728.43	16.4574	2729.29	7.21542	2729.92	3.03796	2729.92	3.03796	99.9454
13OK1-73	68.8591	68273.5	2.25287	8.75225	0.581118	5.35912	0.970773	0.340183	0.777626	0.801038	1887.55	12.7244	1878.35	8.30718	1868.17	10.4863	1868.17	10.4863	101.037
13OK1-74	27.139	90333.1	0.379057	5.32562	0.605913	13.7492	1.05258	0.531063	0.860694	0.817699	2745.93	19.2451	2732.59	9.96341	2722.73	9.98439	2722.73	9.98439	100.852
13OK1-75	31.2068	42096.4	1.59863	4.83575	0.690238	15.3271	2.34107	0.537555	2.237	0.955547	2773.2	50.418	2835.79	22.3185	2880.57	11.2089	2880.57	11.2089	96.2727
13OK1-76	103.292	65658.9	3.00356	11.8507	0.898622	2.57956	1.31704	0.221711	0.962841	0.731067	1290.91	11.264	1294.86	9.63733	1301.39	17.4605	1301.39	17.4605	99.1947
13OK1-77	96.7041	131323	1.2479	5.3191	0.194429	13.658	0.644693	0.526895	0.614676	0.95344	2728.36	13.6735	2726.29	6.09959	2724.75	3.20322	2724.75	3.20322	100.132
13OK1-78	62.761	190588	0.959342	5.39205	0.329138	13.3125	1.85045	0.520608	1.82094	0.984054	2701.76	40.1897	2702.07	17.4781	2702.28	5.43408	2702.28	5.43408	99.9806
13OK1-79	104.464	342187	2.42902	8.78686	0.592913	5.25985	1.02932	0.335201	0.841403	0.817434	1863.54	13.617	1862.37	8.78216	1861.05	10.7064	1861.05	10.7064	100.134
13OK1-81	68.4595	109144	1.35287	5.37887	0.34021	13.6096	2.26059	0.530928	2.23485	0.988611	2745.36	49.9638	2722.93	21.3857	2706.32	5.61473	2706.32	5.61473	101.443
13OK1-82	205.805	77110.7	0.786437	17.6691	2.22787	0.590726	2.77073	0.0757007	1.64729	0.594531	470.409	7.47301	471.331	10.4479	475.83	49.2704	470.409	7.47301	98.8608
13OK1-85	224.488	440080	1.05066	4.99034	0.4656	14.8045	0.9232	0.535823	0.797191	0.863509	2765.94	17.9292	2802.75	8.78111	2829.34	7.5943	2829.34	7.5943	97.759
13OK1-86	45.2158	71114.8	2.54368	5.33235	0.704014	13.9593	3.21875	0.539859	3.14082	0.975787	2782.86	70.9869	2746.95	30.5071	2720.65	11.6032	2720.65	11.6032	102.287
13OK1-87	53.7951	114342	1.36095	5.29361	0.527008	13.5395	2.39348	0.519819	2.33474	0.975458	2698.41	51.4786	2718.04	22.6352	2732.66	8.67284	2732.66	8.67284	98.7467
13OK1-88	60.8657	84634.6	2.51786	5.29243	0.368837	14.0943	1.56072	0.541001	1.51651	0.971674	2787.64	34.3213	2756.07	14.7985	2733.03	6.06858	2733.03	6.06858	101.998
13OK1-89	107.269	101888	0.82798	5.38304	0.2229	13.3365	1.10357	0.520677	1.08083	0.979389	2702.05	23.8565	2703.77	10.4242	2705.04	3.67912	2705.04	3.67912	99.8893
13OK1-90	34.044	145981	0.995339	5.31219	0.671096	13.9529	1.30743	0.537573	1.12205	0.858213	2773.28	25.2892	2746.52	12.3882	2726.89	11.0509	2726.89	11.0509	101.701
13OK1-91	78.3549	29158.3	1.29025	5.22039	0.356579	13.4162	3.45587	0.507962	3.43742	0.994663	2647.92	74.6468	2709.4	32.6675	2755.56	5.85809	2755.56	5.85809	96.0938
13OK1-92	62.7347	81770.8	0.996616	5.38284	0.411678	13.5791	2.28614	0.530129	2.24876	0.983653	2742	50.2255	2720.81	21.6241	2705.11	6.79501	2705.11	6.79501	101.364
13OK1-93	36.643	62399.9	1.93583	4.70562	0.457438	17.08	1.19522	0.582914	1.10422	0.923864	2960.63	26.2135	2939.34	11.4654	2924.79	7.40194	2924.79	7.40194	101.225
13OK1-94	105.676	110796	2.00931	8.73334	0.45852	5.38338	0.754921	0.340984	0.599721	0.794416	1891.4	9.83057	1882.21	6.4646	1872.07	8.27006	1872.07	8.27006	101.033
13OK1-95	152.492	70979.7	1.14634	5.36543	0.178681	13.5312	0.720666	0.526549	0.698164	0.968776	2726.9	15.524	2717.47	6.81405	2710.45	2.94774	2710.45	2.94774	100.607
13OK1-96	56.9316	16535.1	0.0695435	13.2739	2.53195	1.94603	2.81493	0.187347	1.23008	0.436984	1106.98	12.5118	1097.08	18.8826	1077.49	50.8421	1077.49	50.8421	102.738
13OK1-97	29.2635	42961.7	1.06508	5.29845	0.756084	13.7756	0.903911	0.529369	0.495371	0.548031	2738.79	11.0534	2734.41	8.55719	2731.15	12.446	2731.15	12.446	100.28
13OK1-98	94.5126	233849	0.526044	5.41022	0.187972	13.3649	0.629061	0.524422	0.60032	0.954312	2717.91	13.313	2705.78	5.94279	2696.73	3.10506	2696.73	3.10506	100.785
13OK1-99	119.542	194737	1.24756	5.36149	0.226124	13.6374	0.717296	0.530292	0.680721	0.94901	2742.68	15.2065	2724.86	6.78582	2711.66	3.72999	2711.66	3.72999	101.144
13OK1-100	64.754	72711.1	0.795444	8.97842	0.830783	5.15803	1.23828	0.335879	0.918229	0.741534	1866.81	14.8828	1845.72	10.5319	1822.01	15.0739	1822.01	15.0739	102.459
13OK1-101	101.163	81229.4	0.772854	5.38688	0.268947	13.3761	1.95679	0.522596	1.93821	0.99051	2710.18	42.8852	2706.57	18.4888	2703.87	4.43966	2703.87	4.43966	100.234
13OK1-102	124.703	268731	1.5695	8.57353	0.460692	5.59103	0.890957	0.347656	0.762605	0.85594	1923.4	12.682	1914.72	7.6742	1905.31	8.27626	1905.31	8.27626	100.949
13OK1-103	100.03	272296	1.00814	5.39869	0.241542	13.2604	0.812694	0.51921	0.77597	0.954812	2695.83	17.0958	2698.36	7.67344	2700.25	3.98864	2700.25	3.98864	99.8363
13OK1-105	84.888	179394	1.48104	5.28103	0.22384	13.976	0.856641	0.535303	0.826879	0.965258	2763.75	18.5852	2748.08	8.11755	2736.57	3.68041	2736.57	3.68041	100.993
Sample GIBBONS-HESS - Upper Ordovician Simpson Sandstone
							Isotope ratios						Apparent ages (Ma)
Analysis	U	206Pb	U/Th	206Pb*	±	207Pb*	±	206Pb*	±	error	206Pb*	±	207Pb*	±	206Pb*	±	Best age	±	Conc
	(ppm)	204Pb		207Pb*	(%)	235U*	(%)	238U	(%)	corr.	238U*	(Ma)	235U	(Ma)	207Pb*	(Ma)	(Ma)	(Ma)	(%)
ACHAPMAN_GIBBONS-1 <>	120.895	548345	1.20704	5.31883	0.793057	13.7479	0.962914	0.530338	0.546136	0.56717	2742.88	12.2007	2732.5	9.11456	2724.83	13.0624	2724.83	13.0624	100.662
ACHAPMAN_GIBBONS-2 <>	97.3599	122540	0.708773	5.36673	1.32594	12.7506	4.44338	0.496295	4.24094	0.954438	2597.85	90.6842	2661.4	41.86	2710.05	21.8763	2710.05	21.8763	95.86
ACHAPMAN_GIBBONS-3 <>	100.005	85480.7	0.626824	5.40237	1.00191	13.6803	1.74459	0.536015	1.4282	0.818648	2766.75	32.1287	2727.83	16.509	2699.13	16.5435	2699.13	16.5435	102.505
ACHAPMAN_GIBBONS-4 <>	50.9195	108234	1.218	5.37241	2.08585	13.6962	2.22603	0.533662	0.777445	0.349252	2756.86	17.4391	2728.93	21.0677	2708.31	34.4149	2708.31	34.4149	101.793
ACHAPMAN_GIBBONS-5 <>	57.7373	127551	1.48809	5.30113	2.8372	14.2071	3.08296	0.546224	1.20621	0.391252	2809.45	27.4691	2763.63	29.2535	2730.32	46.7233	2730.32	46.7233	102.898
ACHAPMAN_GIBBONS-6 <>	153.854	62100	1.0039	13.0441	3.2926	2.01274	3.38996	0.190415	0.806637	0.237949	1123.62	8.31761	1119.82	22.9999	1112.42	65.7635	1112.42	65.7635	101.007
ACHAPMAN_GIBBONS-7 <>	36.9599	102477	1.10913	5.2164	2.05032	14.2917	2.55439	0.540698	1.52352	0.596432	2786.37	34.4674	2769.27	24.2453	2756.82	33.6766	2756.82	33.6766	101.072
ACHAPMAN_GIBBONS-8 <>	54.2616	9701.21	1.0721	5.41641	3.25236	13.2625	3.97925	0.520996	2.29272	0.576169	2703.4	50.6273	2698.51	37.5889	2694.84	53.7392	2694.84	53.7392	100.318
ACHAPMAN_GIBBONS-9 <>	34.387	61075.9	1.06824	5.3207	2.6163	13.5009	2.82904	0.520991	1.07631	0.380452	2703.38	23.7663	2715.35	26.7508	2724.25	43.1078	2724.25	43.1078	99.2339
ACHAPMAN_GIBBONS-10 <>	111.283	157794	1.54892	5.25945	1.37666	11.5139	4.74672	0.4392	4.5427	0.957019	2347.06	89.372	2565.71	44.3741	2743.3	22.6398	2743.3	22.6398	85.5559
ACHAPMAN_GIBBONS-11 <>	45.9688	50499.6	1.49396	5.07651	3.36978	15.1756	3.7032	0.55874	1.53567	0.414687	2861.42	35.4859	2826.32	35.2913	2801.37	55.1398	2801.37	55.1398	102.144
ACHAPMAN_GIBBONS-12 <>	162.184	50292.3	1.75257	13.0636	5.05677	1.95884	5.10893	0.185593	0.728206	0.142536	1097.46	7.34849	1101.48	34.356	1109.43	101.098	1109.43	101.098	98.9208
ACHAPMAN_GIBBONS-13 <>	82.8054	108016	0.882379	5.34712	1.38692	13.6532	1.65128	0.529483	0.896218	0.54274	2739.27	20.0005	2725.96	15.6238	2716.09	22.866	2716.09	22.866	100.854
ACHAPMAN_GIBBONS-14 <>	77.7241	105093	2.19298	5.30208	1.98731	13.6319	2.16303	0.524205	0.853988	0.394812	2716.99	18.9334	2724.48	20.4647	2730.03	32.7257	2730.03	32.7257	99.5224
ACHAPMAN_GIBBONS-15 <>	86.9374	104521	0.934868	5.36011	1.32422	13.621	1.47469	0.52952	0.64896	0.440066	2739.43	14.4832	2723.72	13.9505	2712.09	21.8436	2712.09	21.8436	101.008
ACHAPMAN_GIBBONS-16 <>	295.934	552669	8.96458	5.39748	0.571167	13.2262	0.888257	0.517757	0.680271	0.76585	2689.66	14.9598	2695.93	8.38542	2700.62	9.43155	2700.62	9.43155	99.5942
ACHAPMAN_GIBBONS-18 <>	49.5792	124091	1.86853	5.20107	1.30799	15.0514	2.15931	0.567764	1.71808	0.79566	2898.63	40.1101	2818.5	20.5622	2761.65	21.4772	2761.65	21.4772	104.96
ACHAPMAN_GIBBONS-19 <>	49.8433	78288.1	0.924097	5.45513	2.55368	13.1883	2.61284	0.521788	0.55284	0.211586	2706.76	12.2196	2693.22	24.6653	2683.07	42.2379	2683.07	42.2379	100.883
ACHAPMAN_GIBBONS-20 <>	199.089	95709.6	1.37172	12.716	3.73181	2.13451	4.6319	0.196855	2.74373	0.592356	1158.4	29.0916	1160.05	32.0377	1163.1	73.9873	1163.1	73.9873	99.5959
ACHAPMAN_GIBBONS-21 <>	109.398	134621	0.642103	5.35763	1.01448	13.426	1.3678	0.521695	0.917449	0.670748	2706.36	20.2764	2710.09	12.9264	2712.85	16.7327	2712.85	16.7327	99.7608
ACHAPMAN_GIBBONS-22 <>	120.769	514413	0.796879	5.37245	0.919756	13.2944	1.19108	0.518014	0.756778	0.635373	2690.75	16.6477	2700.79	11.2484	2708.29	15.1769	2708.29	15.1769	99.3522
ACHAPMAN_GIBBONS-23 <>	37.3277	28401.1	1.06186	9.64658	6.19584	4.30756	6.28568	0.301372	1.05895	0.16847	1698.11	15.8087	1694.81	51.8437	1690.71	114.384	1690.71	114.384	100.438
ACHAPMAN_GIBBONS-24 <>	91.2235	133937	1.75002	5.3519	1.0969	13.8852	1.36348	0.538962	0.809871	0.593973	2779.1	18.2838	2741.91	12.9152	2714.62	18.0893	2714.62	18.0893	102.376
ACHAPMAN_GIBBONS-25 <>	39.5956	52333.3	1.71847	4.93537	1.85316	15.6387	2.00433	0.559783	0.763621	0.380986	2865.73	17.6666	2854.99	19.1307	2847.4	30.1916	2847.4	30.1916	100.644
ACHAPMAN_GIBBONS-26 <>	84.3287	120124	0.883094	5.43355	1.32777	12.8273	1.57212	0.505497	0.841784	0.535443	2637.38	18.2204	2667.05	14.8097	2689.62	21.945	2689.62	21.945	98.0577
ACHAPMAN_GIBBONS-27 <>	81.8527	126621	0.788557	5.30999	0.607134	12.2583	1.3644	0.472089	1.22187	0.895539	2492.72	25.2602	2624.39	12.8096	2727.57	9.99661	2727.57	9.99661	91.3896
ACHAPMAN_GIBBONS-28 <>	116.385	192611	1.42447	5.36538	0.943378	13.8715	1.30238	0.539787	0.89791	0.689436	2782.55	20.2915	2740.97	12.3356	2710.47	15.5635	2710.47	15.5635	102.66
ACHAPMAN_GIBBONS-29 <>	64.1901	89745.6	0.898413	5.337	1.17686	13.8501	1.34367	0.536105	0.648428	0.482578	2767.12	14.5885	2739.51	12.7254	2719.21	19.3963	2719.21	19.3963	101.762
ACHAPMAN_GIBBONS-30 <>	272.974	368708	1.84051	5.44723	0.396292	13.5465	0.956337	0.535181	0.870364	0.910102	2763.24	19.5597	2718.53	9.04318	2685.47	6.54967	2685.47	6.54967	102.896
ACHAPMAN_GIBBONS-31 <>	51.0651	133155	5.01807	5.40114	2.35645	13.6685	2.51296	0.535434	0.872982	0.347392	2764.31	19.6246	2727.02	23.781	2699.5	38.9138	2699.5	38.9138	102.401
ACHAPMAN_GIBBONS-32 <>	28.244	42749.1	2.14389	5.30959	2.83526	14.5155	3.09712	0.558975	1.24636	0.402426	2862.39	28.8084	2784.02	29.429	2727.7	46.7027	2727.7	46.7027	104.938
ACHAPMAN_GIBBONS-33 <>	62.5473	66029.7	1.09396	5.27626	1.82767	14.061	2.0575	0.538074	0.944945	0.459269	2775.38	21.3104	2753.83	19.5068	2738.06	30.0736	2738.06	30.0736	101.363
ACHAPMAN_GIBBONS-34 <>	120.103	180165	1.46516	5.44052	1.07119	12.8719	1.20965	0.507904	0.561976	0.464576	2647.67	12.2024	2670.32	11.3977	2687.51	17.7069	2687.51	17.7069	98.5179
ACHAPMAN_GIBBONS-35 <>	35.2529	46724.5	1.17921	5.26153	2.86994	14.1133	3.95413	0.538568	2.72003	0.687897	2777.45	61.3803	2757.35	37.51	2742.66	47.2086	2742.66	47.2086	101.269
ACHAPMAN_GIBBONS-36 <>	41.0259	58913.6	0.882247	5.40637	4.02596	13.3844	4.22314	0.524812	1.27538	0.301999	2719.56	28.2976	2707.16	39.9206	2697.9	66.515	2697.9	66.515	100.803
ACHAPMAN_GIBBONS-37 <>	83.3054	189363	0.829994	5.3422	2.07975	13.8752	2.1653	0.537596	0.60264	0.278317	2773.38	13.5828	2741.22	20.5108	2717.61	34.2847	2717.61	34.2847	102.052
ACHAPMAN_GIBBONS-39 <>	24.6696	29005.3	1.01502	5.35933	5.00241	14.1784	5.36972	0.551109	1.95188	0.363497	2829.78	44.7067	2761.72	50.9739	2712.33	82.5553	2712.33	82.5553	104.331
ACHAPMAN_GIBBONS-40 <>	157.804	321705	2.56145	5.26654	1.44105	14.2186	1.5335	0.543103	0.5244	0.341963	2796.42	11.8979	2764.4	14.5488	2741.09	23.7038	2741.09	23.7038	102.019
ACHAPMAN_GIBBONS-42 <>	48.3747	61982.9	2.10776	8.90821	8.05151	5.01945	8.12526	0.324298	1.09229	0.134431	1810.69	17.2431	1822.61	68.9021	1836.24	146.081	1836.24	146.081	98.6083
ACHAPMAN_GIBBONS-43 <>	77.607	135481	0.619142	5.4105	1.67286	13.3351	1.78345	0.523276	0.618245	0.346656	2713.06	13.6909	2703.67	16.8471	2696.64	27.632	2696.64	27.632	100.609
ACHAPMAN_GIBBONS-44 <>	67.9212	108626	0.915172	5.30843	1.76462	13.866	1.88288	0.533847	0.656775	0.348814	2757.64	14.7357	2740.6	17.8343	2728.05	29.0629	2728.05	29.0629	101.085
ACHAPMAN_GIBBONS-45 <>	28.6192	41019.1	1.01499	5.29417	3.83326	14.0136	4.1109	0.538082	1.48514	0.361269	2775.41	33.4934	2750.63	38.9803	2732.48	63.1243	2732.48	63.1243	101.571
ACHAPMAN_GIBBONS-46 <>	42.5783	56686.4	1.19889	5.29888	3.49631	12.6762	3.5879	0.487159	0.80553	0.224513	2558.37	17.0104	2655.89	33.7796	2731.02	57.5784	2731.02	57.5784	93.6782
ACHAPMAN_GIBBONS-47 <>	44.518	48996.5	1.24068	4.4663	3.38561	18.5378	3.49041	0.600487	0.848882	0.243204	3031.8	20.5314	3018.07	33.6394	3008.93	54.3996	3008.93	54.3996	100.76
ACHAPMAN_GIBBONS-49 <>	72.0377	124959	2.87369	5.0318	2.40623	14.9697	2.71897	0.546304	1.26603	0.46563	2809.78	28.8341	2813.31	25.8848	2815.83	39.3137	2815.83	39.3137	99.7851
ACHAPMAN_GIBBONS-50 <>	57.6169	140474	2.44049	5.33893	1.95473	13.7021	2.107	0.530565	0.786432	0.373248	2743.83	17.5739	2729.34	19.9415	2718.62	32.2199	2718.62	32.2199	100.928
ACHAPMAN_GIBBONS_51 <>	35.7592	53925	1.76534	5.1361	1.89477	14.9632	2.06839	0.557387	0.829518	0.401045	2855.82	19.1384	2812.9	19.6889	2782.27	31.0518	2782.27	31.0518	102.644
ACHAPMAN_GIBBONS_52 <>	19.179	19388.6	1.07597	5.76846	6.8402	11.6075	7.04111	0.48562	1.67	0.237179	2551.7	35.1907	2573.28	65.9159	2590.31	114.272	2590.31	114.272	98.5096
ACHAPMAN_GIBBONS_53 <>	36.2739	49646.2	0.679072	5.36936	4.42323	13.5465	4.59225	0.52753	1.23442	0.268804	2731.04	27.4815	2718.53	43.4499	2709.24	73.0053	2709.24	73.0053	100.805
ACHAPMAN_GIBBONS_54 <>	79.1595	299697	1.01232	5.32214	1.67904	13.9275	1.78849	0.537599	0.616058	0.344457	2773.39	13.8853	2744.79	16.945	2723.81	27.6639	2723.81	27.6639	101.82
ACHAPMAN_GIBBONS_56 <>	90.2828	369202	1.62329	5.36558	2.04479	13.6736	2.21639	0.532105	0.85511	0.385812	2750.32	19.1448	2727.37	20.9741	2710.4	33.7306	2710.4	33.7306	101.473
ACHAPMAN_GIBBONS_57 <>	46.6125	85157	0.870066	5.37152	2.10108	13.6135	2.26657	0.530352	0.850187	0.375098	2742.94	18.9936	2723.2	21.4427	2708.58	34.6654	2708.58	34.6654	101.268
ACHAPMAN_GIBBONS_59 <>	42.2564	124755	0.414103	5.39631	3.14176	10.481	3.9968	0.410204	2.47058	0.618139	2215.85	46.3279	2478.24	37.0645	2700.98	51.8837	2700.98	51.8837	82.0389
ACHAPMAN_GIBBONS_60 <>	68.3647	90601.2	1.09242	5.37495	1.03494	13.5024	1.28697	0.526361	0.76497	0.594397	2726.1	17.0055	2715.45	12.1672	2707.53	17.0789	2707.53	17.0789	100.686
ACHAPMAN_GIBBONS_61 <>	24.3954	35327.8	0.893437	5.32925	5.03748	13.8851	5.25618	0.536678	1.50038	0.285451	2769.53	33.7796	2741.9	49.8248	2721.61	83.0636	2721.61	83.0636	101.761
ACHAPMAN_GIBBONS_62 <>	65.0964	85309.8	0.760042	5.37485	1.84132	13.6574	2.17506	0.532394	1.15777	0.532294	2751.53	25.9302	2726.25	20.5813	2707.56	30.3808	2707.56	30.3808	101.624
ACHAPMAN_GIBBONS_63 <>	26.2623	47661.7	1.2836	5.30429	6.16592	13.9082	6.6076	0.535052	2.37523	0.35947	2762.7	53.3712	2743.47	62.6715	2729.34	101.632	2729.34	101.632	101.222
ACHAPMAN_GIBBONS_64 <>	30.7019	40169.9	32.6001	5.24366	3.2341	13.7799	3.41325	0.524056	1.09127	0.319715	2716.36	24.1896	2734.7	32.3235	2748.25	53.1757	2748.25	53.1757	98.8397
ACHAPMAN_GIBBONS_65 <>	63.7582	117226	1.46945	9.69239	8.36877	4.41825	8.45396	0.310584	1.19713	0.141606	1743.58	18.2884	1715.77	70.1085	1681.97	154.796	1681.97	154.796	103.663
ACHAPMAN_GIBBONS_66 <>	46.4397	61537.1	1.20447	5.1823	1.85076	14.3892	1.96294	0.540827	0.654059	0.333204	2786.91	14.7993	2775.72	18.6383	2767.58	30.3713	2767.58	30.3713	100.698
ACHAPMAN_GIBBONS_67 <>	65.619	144768	1.54835	5.25034	1.90529	14.0795	2.14096	0.536134	0.976508	0.456108	2767.25	21.9705	2755.08	20.3	2746.16	31.3277	2746.16	31.3277	100.768
ACHAPMAN_GIBBONS_68 <>	31.295	72704	0.702951	5.312	3.5404	14.4499	7.26815	0.5567	6.34756	0.87334	2852.98	146.358	2779.72	69.1295	2726.95	58.3271	2726.95	58.3271	104.622
ACHAPMAN_GIBBONS_69 <>	159.437	37569.3	1.69929	13.2802	4.59741	1.91376	5.35706	0.184328	2.74989	0.51332	1090.58	27.5903	1085.9	35.7413	1076.54	92.3376	1076.54	92.3376	101.304
ACHAPMAN_GIBBONS_70 <>	151.36	294305	0.989833	5.37819	0.941376	13.7013	2.35798	0.534439	2.16191	0.916851	2760.13	48.5414	2729.29	22.3175	2706.53	15.5362	2706.53	15.5362	101.98
ACHAPMAN_GIBBONS_71 <>	30.3591	63773.5	0.521582	5.41926	4.13667	13.2296	4.2508	0.51998	0.978409	0.23017	2699.1	21.5769	2696.17	40.1496	2693.97	68.3712	2693.97	68.3712	100.19
ACHAPMAN_GIBBONS_73 <>	161.507	420312	1.25505	4.67456	0.907165	17.4379	1.13059	0.591198	0.674743	0.596808	2994.28	16.1609	2959.24	10.8576	2935.49	14.6622	2935.49	14.6622	102.003
ACHAPMAN_GIBBONS_74 <>	75.7318	144620	1.0483	5.34229	1.67063	14.0412	1.80753	0.544041	0.690051	0.381764	2800.34	15.6737	2752.49	17.1348	2717.58	27.5413	2717.58	27.5413	103.045
ACHAPMAN_GIBBONS_75 <>	92.4838	349022	1.26878	5.33924	1.16228	13.5279	1.36227	0.523853	0.710561	0.5216	2715.5	15.7466	2717.24	12.8808	2718.52	19.1571	2718.52	19.1571	99.8888
ACHAPMAN_GIBBONS_76-1 <>	22.0721	58965.7	0.503011	5.40658	3.56452	13.5083	3.73852	0.529691	1.12727	0.301529	2740.15	25.1633	2715.87	35.3581	2697.84	58.8849	2697.84	58.8849	101.568
ACHAPMAN_GIBBONS_77 <>	43.4764	82938.6	1.27262	5.25731	1.43268	14.2607	1.76171	0.543755	1.02522	0.581944	2799.15	23.2789	2767.2	16.7175	2743.98	23.5597	2743.98	23.5597	102.011
ACHAPMAN_GIBBONS_78 <>	60.2581	138647	1.56734	5.26391	0.890023	13.8646	1.32602	0.529315	0.982953	0.741279	2738.56	21.9316	2740.5	12.5591	2741.91	14.6371	2741.91	14.6371	99.8779
ACHAPMAN_GIBBONS_79 <>	241.16	1.06024e+06	1.30748	5.34013	0.152275	13.8274	0.570202	0.535538	0.549493	0.963681	2764.74	12.3541	2737.96	5.39931	2718.24	2.51026	2718.24	2.51026	101.711
ACHAPMAN_GIBBONS_80 <>	35.5695	45414.9	2.0547	5.29199	1.4725	14.1487	1.86505	0.543042	1.14462	0.613722	2796.17	25.9681	2759.72	17.6891	2733.16	24.239	2733.16	24.239	102.305
ACHAPMAN_GIBBONS_81 <>	126.59	172107	0.858111	5.33017	0.365353	13.6675	0.787651	0.528357	0.697791	0.885913	2734.53	15.5506	2726.95	7.45255	2721.32	6.02114	2721.32	6.02114	100.485
ACHAPMAN_GIBBONS_82 <>	197.045	269491	2.3776	5.40807	0.279617	13.4314	0.844811	0.52682	0.797195	0.943637	2728.04	17.732	2710.47	7.98383	2697.38	4.61864	2697.38	4.61864	101.137
ACHAPMAN_GIBBONS_83 <>	71.9814	80987.6	1.84835	5.31143	1.52397	12.7977	2.89373	0.492995	2.45991	0.850084	2583.62	52.3639	2664.88	27.2595	2727.13	25.1006	2727.13	25.1006	94.7379
ACHAPMAN_GIBBONS_84 <>	98.5425	133268	0.678905	5.36084	1.02038	13.6035	1.13546	0.528912	0.498088	0.438665	2736.87	11.1077	2722.51	10.7402	2711.86	16.8317	2711.86	16.8317	100.922
ACHAPMAN_GIBBONS_85-1 <>	191.187	184494	1.10565	5.37421	0.418579	13.9933	0.739771	0.545423	0.609961	0.824527	2806.11	13.8774	2749.25	7.01063	2707.75	6.90719	2707.75	6.90719	103.632
ACHAPMAN_GIBBONS_86 <>	20.9936	54232.9	1.63725	5.13827	3.82459	14.189	4.53611	0.528771	2.43902	0.537689	2736.27	54.3837	2762.42	43.0523	2781.57	62.6978	2781.57	62.6978	98.3714
ACHAPMAN_GIBBONS_87 <>	12.2156	29180	1.42601	5.14039	3.5977	15.1854	4.77743	0.566136	3.14331	0.65795	2891.94	73.2513	2826.94	45.5427	2780.9	58.9785	2780.9	58.9785	103.993
ACHAPMAN_GIBBONS_88 <>	22.4654	17047.9	0.849254	5.40622	3.34441	13.2965	3.44277	0.521352	0.817064	0.237327	2704.91	18.05	2700.94	32.5233	2697.95	55.2485	2697.95	55.2485	100.258
ACHAPMAN_GIBBONS_89 <>	91.8177	115958	3.31955	8.75899	3.2413	5.51006	3.55345	0.350034	1.45635	0.409843	1934.76	24.3418	1902.17	30.548	1866.78	58.5086	1866.78	58.5086	103.641
ACHAPMAN_GIBBONS_90 <>	139.528	98061.2	2.01649	11.8233	2.85599	2.72484	3.10417	0.233657	1.21622	0.391802	1353.64	14.8496	1335.25	23.0613	1305.88	55.4491	1305.88	55.4491	103.657
ACHAPMAN_GIBBONS_91 <>	195.348	271265	1.70329	5.38844	0.276388	13.6009	0.575803	0.531533	0.505133	0.877266	2747.91	11.3013	2722.33	5.44623	2703.39	4.5627	2703.39	4.5627	101.647
ACHAPMAN_GIBBONS_92 <>	51.5555	66785	0.717123	5.29315	1.62704	13.9503	1.94684	0.535544	1.06907	0.549131	2764.77	24.0358	2746.34	18.4477	2732.8	26.7846	2732.8	26.7846	101.17
ACHAPMAN_GIBBONS_93 <>	57.4967	89727.3	0.723225	5.42853	0.774424	13.4226	2.15918	0.528468	2.01552	0.933466	2734.99	44.9237	2709.85	20.4066	2691.14	12.7959	2691.14	12.7959	101.629
ACHAPMAN_GIBBONS_94 <>	38.2537	84367.4	1.90245	5.25744	0.968118	14.6546	1.50237	0.558789	1.14886	0.764695	2861.62	26.549	2793.08	14.2813	2743.93	15.9188	2743.93	15.9188	104.289
ACHAPMAN_GIBBONS_95 <>	74.5982	137616	1.66928	5.36615	0.681766	13.3648	1.86549	0.520143	1.73645	0.930826	2699.79	38.3022	2705.77	17.625	2710.23	11.2476	2710.23	11.2476	99.6147
ACHAPMAN_GIBBONS_96 <>	58.4034	91017.5	0.738873	5.35805	1.08769	13.5915	1.2493	0.52817	0.614553	0.491917	2733.74	13.6924	2721.67	11.8164	2712.72	17.9407	2712.72	17.9407	100.775
ACHAPMAN_GIBBONS_97 <>	36.3084	43111.7	1.40604	5.34482	2.46563	12.251	4.06118	0.474902	3.22706	0.79461	2505.02	66.9856	2623.82	38.1425	2716.8	40.6521	2716.8	40.6521	92.2049
ACHAPMAN_GIBBONS_99 <>	121.818	105689	1.72044	5.38849	0.521824	13.7151	1.00663	0.536001	0.860819	0.855147	2766.69	19.3645	2730.24	9.52685	2703.37	8.61449	2703.37	8.61449	102.342
ACHAPMAN-GIBBONS2-1 <>	49.7237	52805.9	2.78605	5.44333	0.520636	12.9268	1.08432	0.510334	0.951151	0.877187	2658.06	20.7182	2674.33	10.2198	2686.65	8.60492	2686.65	8.60492	98.9358
ACHAPMAN-GIBBONS2-2 <>	102.97	50065.1	1.69075	11.6351	3.71088	2.79787	3.87854	0.2361	1.12801	0.290833	1366.39	13.889	1354.97	29.0204	1336.97	71.7669	1336.97	71.7669	102.2
ACHAPMAN-GIBBONS2-3 <>	39.2512	53807	1.41321	5.33993	0.927796	13.4273	1.08789	0.520024	0.56807	0.522175	2699.28	12.5283	2710.18	10.281	2718.31	15.2951	2718.31	15.2951	99.3001
ACHAPMAN-GIBBONS2-4 <>	47.2108	135945	1.9474	5.26394	0.693822	14.1882	0.909153	0.541672	0.587511	0.646219	2790.44	13.307	2762.37	8.62379	2741.9	11.4096	2741.9	11.4096	101.77
ACHAPMAN-GIBBONS2-5 <>	33.1867	59398.2	1.21015	4.80143	0.922339	16.3754	1.22311	0.570243	0.8033	0.656768	2908.82	18.8057	2898.97	11.705	2892.13	14.9644	2892.13	14.9644	100.577
ACHAPMAN-GIBBONS2-6 <>	95.7579	154452	0.912787	5.4002	0.540975	13.7557	1.16179	0.538753	1.02816	0.884975	2778.23	23.206	2733.03	10.9976	2699.79	8.9337	2699.79	8.9337	102.905
ACHAPMAN-GIBBONS2-7 <>	124.471	163603	6.11991	8.88335	0.544197	5.2518	0.949738	0.338363	0.778365	0.819558	1878.79	12.6856	1861.06	8.10114	1841.3	9.85193	1841.3	9.85193	102.036
ACHAPMAN-GIBBONS2-8 <>	40.5946	77313.3	1.32211	5.41206	0.606531	13.4714	0.741035	0.52878	0.425739	0.57452	2736.31	9.49276	2713.28	7.00451	2696.17	10.0164	2696.17	10.0164	101.489
ACHAPMAN-GIBBONS2-9 <>	52.8717	69341.7	2.56196	5.0759	0.759617	14.9922	6.62555	0.55192	6.58186	0.993406	2833.15	150.922	2814.74	63.1492	2801.57	12.4274	2801.57	12.4274	101.128
ACHAPMAN-GIBBONS2-10 <>	40.08	72467.6	0.7793	5.43167	0.65212	13.8596	1.11227	0.545989	0.901044	0.810096	2808.47	20.5136	2740.16	10.5341	2690.19	10.7754	2690.19	10.7754	104.397
Sample 13MO1 - Lower Ordovician Roubidoux Sandstone
							Isotope ratios						Apparent ages (Ma)
Analysis	U	206Pb	U/Th	206Pb*	±	207Pb*	±	206Pb*	±	error	206Pb*	±	207Pb*	±	206Pb*	±	Best age	±	Conc
	(ppm)	204Pb		207Pb*	(%)	235U*	(%)	238U	(%)	corr.	238U*	(Ma)	235U	(Ma)	207Pb*	(Ma)	(Ma)	(Ma)	(%)
13MO1-1	35.5348	77078.7	0.437698	5.5163	0.869594	12.8648	2.56627	0.514695	2.41444	0.940838	2676.64	52.8895	2669.8	24.1826	2664.61	14.4081	2664.61	14.4081	100.451
13MO1-2	71.2052	103076	0.867095	5.85073	0.282413	11.6212	0.722361	0.493126	0.664867	0.920408	2584.19	14.1552	2574.38	6.75368	2566.65	4.72342	2566.65	4.72342	100.683
13MO1-3	58.1437	60063	1.12798	5.66663	0.405912	12.3793	0.660754	0.508769	0.521375	0.78906	2651.37	11.3336	2633.61	6.2078	2619.98	6.75397	2619.98	6.75397	101.198
13MO1-4	226.259	29526.7	1.02982	5.5029	0.260385	13.0863	1.13443	0.522286	1.10414	0.973302	2708.87	24.4206	2685.9	10.7015	2668.64	4.3125	2668.64	4.3125	101.507
13MO1-5	67.3104	238242	0.826903	5.3974	0.266057	13.4561	0.765932	0.526746	0.718237	0.93773	2727.73	15.9743	2712.2	7.23928	2700.65	4.3933	2700.65	4.3933	101.003
13MO1-6	66.3342	79388.5	15.246	5.48332	0.505491	13.1429	1.54421	0.522677	1.45913	0.944905	2710.52	32.2881	2689.96	14.572	2674.54	8.36726	2674.54	8.36726	101.345
13MO1-8	104.403	94896.5	0.525523	5.45398	0.300968	13.2555	0.774217	0.524334	0.713323	0.921348	2717.53	15.8173	2698.02	7.30994	2683.42	4.97429	2683.42	4.97429	101.271
13MO1-9	138.663	325150	1.73639	5.48489	0.154371	13.1632	0.558241	0.523636	0.536472	0.961005	2714.58	11.8854	2691.42	5.26812	2674.07	2.55536	2674.07	2.55536	101.515
13MO1-11	85.2286	46924	1.59569	5.01894	0.298795	15.0788	1.09387	0.548879	1.05227	0.96197	2820.51	24.0384	2820.23	10.4165	2820.01	4.87997	2820.01	4.87997	100.018
13MO1-12	93.4753	41073.2	0.931942	12.852	1.4789	2.1015	1.69616	0.195885	0.830541	0.48966	1153.17	8.76982	1149.3	11.6701	1141.99	29.4217	1141.99	29.4217	100.979
13MO1-13	46.1534	55894.2	0.455011	5.50371	0.639449	12.9693	1.68507	0.517693	1.55903	0.925201	2689.39	34.2819	2677.43	15.8864	2668.4	10.5909	2668.4	10.5909	100.787
13MO1-14	205.808	324611	3.42164	5.5874	0.189987	12.7525	0.77734	0.516779	0.753766	0.969673	2685.5	16.5553	2661.54	7.31918	2643.37	3.15096	2643.37	3.15096	101.594
13MO1-15	59.1321	118166	1.18857	5.49032	0.324173	12.9392	0.764257	0.515232	0.692098	0.905584	2678.93	15.1709	2675.23	7.20354	2672.43	5.36701	2672.43	5.36701	100.243
13MO1-16	67.9817	105170	1.75798	10.9324	0.948793	3.22806	1.25425	0.25595	0.820323	0.654036	1469.09	10.7767	1463.92	9.7236	1456.42	18.045	1456.42	18.045	100.87
13MO1-17	63.5352	177055	0.375628	5.50113	0.755551	12.8957	1.13584	0.514511	0.848105	0.746675	2675.86	18.5734	2672.06	10.7036	2669.17	12.513	2669.17	12.513	100.25
13MO1-18	163.319	129059	1.43003	5.38735	0.146968	13.4644	0.66951	0.52609	0.65318	0.975609	2724.96	14.5155	2712.79	6.32819	2703.72	2.42611	2703.72	2.42611	100.785
13MO1-19	85.4584	58330.6	1.59633	12.2879	1.24154	2.3827	1.4665	0.212346	0.78052	0.532232	1241.31	8.81293	1237.42	10.489	1230.68	24.3492	1230.68	24.3492	100.864
13MO1-20	71.4044	98834.5	1.38893	5.41566	0.277051	13.5116	2.04067	0.530709	2.02178	0.990741	2744.44	45.188	2716.1	19.2951	2695.07	4.57726	2695.07	4.57726	101.832
13MO1-21	84.2986	27144.2	0.594262	5.40911	0.212304	13.3255	0.987643	0.522768	0.964554	0.976623	2710.91	21.3463	2702.99	9.32858	2697.07	3.50688	2697.07	3.50688	100.513
13MO1-23	89.4061	42027.5	1.35207	5.36765	0.323292	13.3683	0.975113	0.520426	0.91996	0.94344	2700.99	20.2994	2706.02	9.21229	2709.77	5.33378	2709.77	5.33378	99.6759
13MO1-25	23.0663	35769.6	0.653432	5.5898	0.837002	12.5032	1.19567	0.506892	0.853842	0.714114	2643.35	18.5153	2642.97	11.242	2642.66	13.8938	2642.66	13.8938	100.026
13MO1-26	166.065	288352	2.07235	5.41089	0.303717	13.3789	0.690649	0.525034	0.620284	0.898117	2720.49	13.7663	2706.77	6.52512	2696.52	5.01714	2696.52	5.01714	100.889
13MO1-28	51.4222	28866.7	0.511896	5.47431	0.762081	12.7311	1.42886	0.505467	1.20867	0.845896	2637.25	26.1607	2659.96	13.4526	2677.26	12.6081	2677.26	12.6081	98.5054
13MO1-29	90.973	362035	2.23384	4.05516	0.338796	22.1426	1.2115	0.651232	1.16317	0.960102	3233.02	29.5727	3190.01	11.7704	3163.05	5.37424	3163.05	5.37424	102.212
13MO1-30	68.0031	113098	1.96673	5.38338	0.384575	13.6563	1.06979	0.533197	0.998275	0.93315	2754.91	22.38	2726.17	10.1217	2704.94	6.34776	2704.94	6.34776	101.847
13MO1-31	51.4827	44584.4	2.3056	10.6254	0.871682	3.34987	1.36221	0.25815	1.0468	0.768458	1480.37	13.846	1492.76	10.6523	1510.39	16.4575	1510.39	16.4575	98.0125
13MO1-32	37.2455	56817.1	0.967767	5.0999	0.414131	14.7371	1.13118	0.545095	1.05265	0.930573	2804.74	23.9398	2798.42	10.7564	2793.85	6.77998	2793.85	6.77998	100.39
13MO1-33	35.9685	20168.1	0.937638	5.484	0.768422	13.2372	1.83152	0.526492	1.66253	0.90773	2726.65	36.9648	2696.71	17.2924	2674.34	12.7198	2674.34	12.7198	101.956
13MO1-34	47.1756	30625.5	1.81323	12.2994	1.88898	2.40064	2.21538	0.214146	1.15743	0.522455	1250.87	13.16	1242.79	15.881	1228.8	37.0756	1228.8	37.0756	101.796
13MO1-35	69.4282	98535.2	1.84059	12.977	2.63548	1.99188	2.81022	0.187473	0.975473	0.347117	1107.67	9.92769	1112.76	18.9994	1122.7	52.5532	1122.7	52.5532	98.661
13MO1-36	90.7349	190845	1.05196	5.42672	0.287845	13.396	1.2918	0.527242	1.25933	0.974859	2729.82	28.026	2707.97	12.2062	2691.7	4.75377	2691.7	4.75377	101.416
13MO1-37	45.6502	76956.8	0.868546	5.14216	0.397712	14.9284	0.90712	0.556748	0.815286	0.898763	2853.18	18.7962	2810.69	8.63269	2780.34	6.51541	2780.34	6.51541	102.62
13MO1-38	41.4754	61661.8	0.914689	5.44154	0.823825	13.2614	1.35988	0.523372	1.08194	0.795612	2713.47	23.9623	2698.44	12.8405	2687.19	13.6174	2687.19	13.6174	100.978
13MO1-39	104.554	114399	1.34037	5.48036	0.26535	12.8607	1.10371	0.511176	1.07133	0.97067	2661.65	23.3615	2669.5	10.3987	2675.44	4.39186	2675.44	4.39186	99.4847
13MO1-41	92.2337	166146	1.13894	5.38261	0.378058	13.5656	0.868214	0.529579	0.78158	0.900216	2739.68	17.4442	2719.87	8.21063	2705.18	6.24005	2705.18	6.24005	101.275
13MO1-43	67.1529	62273.2	1.07238	5.39845	0.429981	13.4343	0.927257	0.525995	0.821537	0.885986	2724.56	18.2547	2710.67	8.76315	2700.33	7.10035	2700.33	7.10035	100.897
13MO1-44	140.648	91939.4	1.57791	13.254	0.599687	1.91027	1.5123	0.183629	1.38832	0.918018	1086.77	13.8846	1084.68	10.0796	1080.5	12.0138	1080.5	12.0138	100.58
13MO1-45	35.9236	105682	2.00764	5.4159	0.811599	13.4527	1.88252	0.52842	1.69859	0.902293	2734.79	37.8571	2711.97	17.794	2694.99	13.4055	2694.99	13.4055	101.477
13MO1-46	102.805	199673	0.852089	5.40033	0.238872	13.3483	0.809615	0.52281	0.773574	0.955484	2711.09	17.1206	2704.6	7.64789	2699.75	3.94473	2699.75	3.94473	100.42
13MO1-47	40.1963	54300.5	0.768408	5.74617	0.794075	11.9246	1.38713	0.49696	1.13736	0.819934	2600.72	24.3405	2598.5	12.9957	2596.76	13.2393	2596.76	13.2393	100.152
13MO1-48	71.7297	118026	0.898596	5.36718	0.32621	13.7931	0.876857	0.536916	0.81392	0.928224	2770.53	18.3298	2735.61	8.30178	2709.91	5.38185	2709.91	5.38185	102.237
13MO1-49	27.5551	47925.1	1.13115	5.23422	0.964624	14.516	1.65043	0.551058	1.33919	0.811417	2829.57	30.6714	2784.05	15.6794	2751.21	15.8542	2751.21	15.8542	102.848
13MO1-50	131.47	196002	1.94516	5.33141	0.256062	13.767	1.18657	0.532329	1.15861	0.976437	2751.26	25.9469	2733.81	11.2328	2720.94	4.22013	2720.94	4.22013	101.114
13MO1-51	103.804	131658	1.83494	5.40094	0.217232	13.3479	0.658911	0.522855	0.622072	0.944092	2711.28	13.7684	2704.58	6.22424	2699.56	3.58744	2699.56	3.58744	100.434
13MO1-52	135.056	6766.02	2.42833	12.2058	4.75539	2.28338	5.5346	0.202137	2.83161	0.511619	1186.79	30.6935	1207.16	39.101	1243.8	93.2076	1243.8	93.2076	95.4162
13MO1-53	37.0589	97423.1	0.58099	5.47115	0.840954	12.7772	1.25483	0.507004	0.931342	0.742205	2643.83	20.1988	2663.36	11.8171	2678.22	13.9122	2678.22	13.9122	98.7159
13MO1-54	52.5043	105706	0.785556	5.53989	0.451395	12.7125	1.13099	0.510777	1.03701	0.916901	2659.94	22.6013	2658.59	10.6468	2657.54	7.48401	2657.54	7.48401	100.091
13MO1-55	20.8166	55164.6	1.90265	5.21324	1.40903	14.0646	1.81682	0.531782	1.14694	0.63129	2748.96	25.6684	2754.07	17.2248	2757.81	23.1413	2757.81	23.1413	99.6789
13MO1-56	58.8398	109140	0.855627	5.41818	0.367119	13.3855	1.02051	0.525999	0.952194	0.933053	2724.57	21.1581	2707.23	9.6421	2694.3	6.06577	2694.3	6.06577	101.124
13MO1-57	33.7688	19810.6	1.01326	12.4549	2.87905	2.3601	3.50112	0.213192	1.99222	0.569023	1245.8	22.5683	1230.61	24.9749	1204.09	56.7367	1204.09	56.7367	103.465
13MO1-58	54.1835	95221.8	0.875154	5.32474	2.29334	13.3055	4.2416	0.513839	3.56815	0.841229	2673	78.0783	2701.57	40.0786	2723	37.7885	2723	37.7885	98.1636
13MO1-59	82.7919	149531	0.783307	5.47594	0.166058	12.7813	0.600622	0.507614	0.57721	0.961021	2646.44	12.5284	2663.67	5.65614	2676.77	2.74811	2676.77	2.74811	98.8667
13MO1-60	114.725	88722	2.79126	13.1232	1.35877	1.9687	1.46568	0.187377	0.549498	0.37491	1107.15	5.59001	1104.86	9.86951	1100.34	27.1624	1100.34	27.1624	100.619
13MO1-61	97.0139	161890	1.7229	5.02707	0.130572	15.2763	0.793843	0.55697	0.783031	0.98638	2854.1	18.0572	2832.62	7.56545	2817.37	2.13304	2817.37	2.13304	101.304
13MO1-62	91.9744	66330.9	1.44705	12.6694	1.78932	2.19717	1.90817	0.201892	0.66293	0.347416	1185.48	7.17861	1180.15	13.3159	1170.37	35.4293	1170.37	35.4293	101.291
13MO1-63	117.038	152130	0.734607	5.56706	0.280376	12.8383	1.43674	0.518359	1.40911	0.980774	2692.22	31.0115	2667.85	13.535	2649.42	4.65218	2649.42	4.65218	101.615
13MO1-64	52.7537	13925.3	1.03376	5.40059	0.559653	12.5694	2.58181	0.492327	2.52042	0.976223	2580.73	53.6032	2647.93	24.2879	2699.67	9.24225	2699.67	9.24225	95.5945
13MO1-65	64.3333	85352.8	0.988728	5.75659	0.473054	11.9564	1.03341	0.49919	0.91878	0.889076	2610.31	19.7215	2601	9.68349	2593.74	7.88794	2593.74	7.88794	100.639
13MO1-67	125.872	155056	1.15396	5.37482	0.221508	13.5464	0.866168	0.528062	0.837365	0.966747	2733.28	18.6543	2718.53	8.19048	2707.57	3.65528	2707.57	3.65528	100.95
13MO1-68	30.7608	88109.9	0.422726	5.52422	0.802965	12.8995	1.49919	0.516826	1.26602	0.844472	2685.71	27.808	2672.34	14.1282	2662.23	13.3071	2662.23	13.3071	100.882
13MO1-69	32.9628	73305.8	1.08049	5.52204	0.63441	12.7382	2.02354	0.510161	1.92152	0.949583	2657.32	41.846	2660.49	19.0534	2662.89	10.513	2662.89	10.513	99.7908
13MO1-70	44.891	63664.3	1.75938	5.33913	0.704252	13.6981	3.95633	0.530431	3.89314	0.984029	2743.27	86.9881	2729.06	37.4557	2718.55	11.6095	2718.55	11.6095	100.909
13MO1-71	47.8739	55045.9	1.33958	5.45296	0.821532	13.1929	6.4412	0.521761	6.38859	0.991833	2706.64	141.227	2693.55	60.8675	2683.73	13.5838	2683.73	13.5838	100.854
13MO1-72	97.6931	219646	0.621904	5.54944	0.528427	12.7857	1.06297	0.514602	0.922317	0.86768	2676.24	20.201	2663.99	10.0106	2654.68	8.7636	2654.68	8.7636	100.812
13MO1-73	193.191	163073	0.658202	5.50676	0.19753	13.0396	0.728246	0.520785	0.700945	0.962511	2702.51	15.4737	2682.52	6.8679	2667.48	3.27186	2667.48	3.27186	101.313
13MO1-74	101.872	206942	0.954299	5.38082	0.324231	13.629	0.692711	0.531879	0.612146	0.883696	2749.36	13.7013	2724.28	6.55296	2705.72	5.35132	2705.72	5.35132	101.613
13MO1-75	87.0432	122147	0.945691	5.46612	0.333475	13.2298	1.29336	0.524481	1.24963	0.966188	2718.16	27.7146	2696.18	12.2102	2679.74	5.51716	2679.74	5.51716	101.434
13MO1-76	72.8715	90978.9	0.922645	5.41179	0.394013	13.2228	0.552631	0.518994	0.387498	0.701188	2694.91	8.53482	2695.68	5.21684	2696.25	6.50892	2696.25	6.50892	99.9504
13MO1-78	62.0542	69135.5	0.926074	5.45273	0.439317	13.5616	1.2612	0.536318	1.18221	0.937371	2768.02	26.6046	2719.59	11.9271	2683.8	7.26224	2683.8	7.26224	103.138
13MO1-79	100.953	212711	0.920849	5.46742	0.231735	13.1923	1.11781	0.523118	1.09353	0.978275	2712.39	24.2112	2693.5	10.5507	2679.35	3.83407	2679.35	3.83407	101.233
13MO1-80	152.758	423102	0.684991	5.44291	0.22834	13.2217	1.15301	0.521936	1.13018	0.980194	2707.38	24.9855	2695.61	10.8847	2686.78	3.77199	2686.78	3.77199	100.767
13MO1-81	173.253	227720	1.44628	5.59413	0.288664	12.7022	0.881271	0.515359	0.832653	0.944832	2679.47	18.2548	2657.82	8.29541	2641.38	4.79005	2641.38	4.79005	101.442
13MO1-82	116.827	81975.3	1.54062	13.3204	1.76272	1.92455	1.88329	0.185927	0.663027	0.352058	1099.27	6.70092	1089.65	12.5846	1070.47	35.4216	1070.47	35.4216	102.69
13MO1-83	131.223	607552	0.528258	5.42529	0.233697	13.5217	0.641262	0.532049	0.597162	0.931229	2750.08	13.3687	2716.8	6.06295	2692.13	3.86208	2692.13	3.86208	102.153
13MO1-84	54.2011	105240	1.04689	5.35508	0.301005	13.8576	0.835794	0.53821	0.77971	0.932897	2775.95	17.5869	2740.02	7.91548	2713.64	4.96427	2713.64	4.96427	102.296
13MO1-85	75.4995	11580.5	0.9893	5.40219	0.620978	11.5564	3.03567	0.452784	2.97148	0.978854	2407.62	59.7026	2569.15	28.3763	2699.18	10.2555	2699.18	10.2555	89.1981
13MO1-86	159.976	167237	2.75376	5.58204	0.139806	12.8694	0.424988	0.521014	0.401335	0.944342	2703.48	8.86219	2670.14	4.00415	2644.96	2.32075	2644.96	2.32075	102.212
13MO1-87	78.1528	190934	1.25485	4.56155	0.270402	18.3533	1.12914	0.607193	1.09628	0.970902	3058.75	26.6994	3008.44	10.8731	2974.99	4.35652	2974.99	4.35652	102.816
13MO1-88	31.0567	21103.3	1.43205	11.8602	3.55089	2.70828	3.75663	0.232961	1.22617	0.3264	1350	14.9349	1330.73	27.865	1299.83	69.0122	1299.83	69.0122	103.859
13MO1-89	117.838	90133.5	1.60187	13.2614	1.37635	1.93717	1.75276	0.186318	1.08528	0.619184	1101.4	10.9879	1094.02	11.7384	1079.35	27.6073	1079.35	27.6073	102.043
13MO1-90	82.2321	228357	1.04329	5.41742	0.232623	13.5918	0.578247	0.534033	0.529392	0.915513	2758.42	11.8804	2721.69	5.4691	2694.53	3.84344	2694.53	3.84344	102.371
13MO1-91	35.2967	40999.4	1.51841	5.39907	0.759536	13.7968	1.23106	0.54025	0.968827	0.786983	2784.5	21.9063	2735.86	11.6558	2700.14	12.5394	2700.14	12.5394	103.124
13MO1-92	31.8836	32497.3	1.09682	5.27883	0.516071	14.0615	2.25869	0.538353	2.19894	0.973548	2776.55	49.6081	2753.86	21.4148	2737.26	8.48927	2737.26	8.48927	101.436
13MO1-93	213.2	26106.4	0.829729	13.0062	0.929531	1.9992	1.06055	0.188584	0.510635	0.481479	1113.7	5.2228	1115.24	7.17829	1118.27	18.5475	1118.27	18.5475	99.5916
13MO1-94	103.006	67312.5	1.95011	9.68596	0.677817	4.34224	0.872523	0.305039	0.549419	0.62969	1716.25	8.27856	1701.42	7.2012	1683.19	12.5142	1683.19	12.5142	101.964
13MO1-95	15.1439	17827.8	1.70065	5.35742	2.06126	13.7888	2.43362	0.535772	1.29373	0.531606	2765.73	29.0949	2735.31	23.0436	2712.91	33.9945	2712.91	33.9945	101.947
13MO1-96	98.2151	185349	1.6072	5.54797	0.332004	12.9137	2.08637	0.519615	2.05978	0.987258	2697.55	45.4041	2673.37	19.6645	2655.12	5.5058	2655.12	5.5058	101.598
13MO1-97	44.7064	121609	0.885292	5.63816	0.467049	12.5339	1.75557	0.512533	1.6923	0.963962	2667.43	36.9673	2645.27	16.5101	2628.35	7.76492	2628.35	7.76492	101.487
13MO1-99	67.8783	155233	1.22047	5.4046	0.473176	13.7151	0.886774	0.537601	0.749982	0.845742	2773.4	16.9039	2730.24	8.39245	2698.45	7.81504	2698.45	7.81504	102.778
13MO1-100	63.8825	127049	0.669809	5.30137	0.477411	13.9111	1.06141	0.534872	0.947987	0.893136	2761.95	21.2961	2743.68	10.055	2730.25	7.85799	2730.25	7.85799	101.161
13MO1-101	169.304	205798	2.85052	12.8976	0.656122	2.08915	0.840245	0.195423	0.524896	0.624694	1150.68	5.53152	1145.24	5.76993	1134.94	13.0478	1134.94	13.0478	101.387
13MO1-102	246.394	200787	1.55938	13.1287	1.02309	1.98134	1.33723	0.18866	0.861082	0.64393	1114.11	8.81017	1109.18	9.02391	1099.51	20.4773	1099.51	20.4773	101.328
13MO1-103	135.323	103512	1.29207	13.5206	1.99996	1.83527	2.12581	0.179968	0.720572	0.338963	1066.8	7.08469	1058.17	13.9729	1040.39	40.3813	1040.39	40.3813	102.539
13MO1-104	51.9882	61309.6	0.572823	5.67495	0.362638	12.2843	1.62401	0.505607	1.583	0.97475	2637.85	34.2693	2626.38	15.2498	2617.53	6.03536	2617.53	6.03536	100.776
13MO1-105	44.7078	133662	0.79764	5.44448	0.415423	13.2158	1.13079	0.521855	1.05171	0.930073	2707.04	23.2485	2695.19	10.6745	2686.3	6.86551	2686.3	6.86551	100.772
Sample 14MO8 - Lower Ordovician Gunter Sandstone
							Isotope ratios						Apparent ages (Ma)
Analysis	U	206Pb	U/Th	206Pb*	±	207Pb*	±	206Pb*	±	error	206Pb*	±	207Pb*	±	206Pb*	±	Best age	±	Conc
	(ppm)	204Pb		207Pb*	(%)	235U*	(%)	238U	(%)	corr.	238U*	(Ma)	235U	(Ma)	207Pb*	(Ma)	(Ma)	(Ma)	(%)
-Spot 1	103.927	29925.7	3.02598	13.5001	2.14859	1.87226	2.98756	0.183316	2.07583	0.694824	1085.07	20.7306	1071.33	19.7762	1043.45	43.3708	1043.45	43.3708	103.988
-Spot 2	265.809	183005	1.60675	5.50319	1.33029	12.8445	2.70023	0.512661	2.3498	0.870222	2667.98	51.3388	2668.31	25.4426	2668.55	22.0303	2668.55	22.0303	99.9785
-Spot 3	47.5562	123373	0.863758	5.58159	1.46045	12.131	2.29229	0.49108	1.76682	0.770768	2575.35	37.5118	2614.59	21.5062	2645.1	24.2404	2645.1	24.2404	97.363
-Spot 4	196.026	113348	1.37626	5.42677	1.45926	12.8789	4.39635	0.506897	4.1471	0.943306	2643.37	89.9348	2670.84	41.4464	2691.68	24.114	2691.68	24.114	98.2052
-Spot 6	105.644	38742.4	2.87214	13.4721	1.8816	1.78958	3.32899	0.174858	2.74622	0.824942	1038.82	26.3486	1041.67	21.6881	1047.67	37.9495	1047.67	37.9495	99.1553
-Spot 7	325.773	506410	1.91005	5.71799	1.46591	12.1417	2.61856	0.503525	2.16979	0.828618	2628.93	46.8439	2615.41	24.57	2604.95	24.4248	2604.95	24.4248	100.92
-Spot 8	193.524	160508	2.67275	13.682	1.62114	1.85292	3.10413	0.183867	2.64718	0.852792	1088.07	26.5036	1064.47	20.4737	1016.4	32.847	1016.4	32.847	107.051
-Spot 9	137.214	49593.8	3.41365	13.497	1.77183	1.85807	2.87044	0.181885	2.25833	0.786753	1077.26	22.4042	1066.3	18.9504	1043.92	35.7473	1043.92	35.7473	103.194
-Spot 10	164.784	32188.9	1.87798	13.4064	1.71238	1.79761	3.38295	0.174786	2.91755	0.862429	1038.43	27.9825	1044.59	22.0751	1057.53	34.4756	1057.53	34.4756	98.1937
-Spot 11	109.674	244998	4.45008	12.2933	2.31371	2.35486	2.71885	0.209959	1.4279	0.525185	1228.6	15.9728	1229.03	19.3802	1229.81	45.4027	1229.81	45.4027	99.9018
-Spot 12	88.1694	72605.6	1.4706	5.52618	1.72961	12.6621	3.57193	0.507492	3.12524	0.874945	2645.92	67.8254	2654.85	33.6264	2661.65	28.6606	2661.65	28.6606	99.4089
-Spot 13	119.32	168575	2.37189	12.996	1.83206	1.88229	4.70368	0.177416	4.33222	0.921029	1052.84	42.0822	1074.87	31.1999	1119.83	36.5458	1119.83	36.5458	94.0178
-Spot 14	122.868	44282.1	1.23094	5.4951	2.28058	12.1469	4.72609	0.484104	4.13943	0.875868	2545.12	87.0482	2615.81	44.366	2670.99	37.7618	2670.99	37.7618	95.2875
-Spot 15	312.073	57974.4	1.11103	13.1243	2.053	1.92166	3.55944	0.182917	2.90771	0.816901	1082.89	28.9849	1088.65	23.776	1100.17	41.0539	1100.17	41.0539	98.4291
-Spot 16	161.567	77234.5	2.24917	5.41898	1.57674	13.0955	4.18133	0.51468	3.87266	0.926177	2676.58	84.8337	2686.55	39.4643	2694.05	26.0501	2694.05	26.0501	99.3514
-Spot 17	147.371	37113.6	0.972728	13.1757	2.52353	1.90135	3.55099	0.181691	2.49826	0.70354	1076.21	24.7621	1081.56	23.633	1092.35	50.5616	1092.35	50.5616	98.5226
-Spot 18	62.3509	26693.1	1.29381	5.52737	1.71331	12.9417	3.18835	0.51881	2.68889	0.843349	2694.13	59.2119	2675.42	30.0607	2661.29	28.3914	2661.29	28.3914	101.234
-Spot 20	120.067	67197.1	0.827538	5.49435	1.54738	12.4987	3.3328	0.498058	2.95181	0.885683	2605.45	63.2662	2642.63	31.3437	2671.21	25.6201	2671.21	25.6201	97.5379
-Spot 21	156.71	27591.1	2.85458	13.6749	2.03347	1.81551	2.97441	0.180062	2.17074	0.729805	1067.31	21.3523	1051.07	19.4772	1017.45	41.1971	1017.45	41.1971	104.901
-Spot 22	130.448	111990	2.87045	12.8868	2.36207	2.07539	3.19738	0.193974	2.15496	0.673976	1142.87	22.5688	1140.71	21.9124	1136.63	47.0101	1136.63	47.0101	100.549
-Spot 23	184.117	123469	2.5939	8.83235	2.77942	5.13676	4.2971	0.329052	3.27718	0.76265	1833.78	52.3059	1842.21	36.5379	1851.72	50.2581	1851.72	50.2581	99.0314
-Spot 24	88.4321	70777.5	1.5354	4.33035	2.08805	18.7763	3.16709	0.589701	2.38127	0.751881	2988.21	56.945	3030.39	30.5412	3058.48	33.4052	3058.48	33.4052	97.7025
-Spot 25	43.3146	39061.2	3.79135	5.32849	2.7248	13.3507	4.06233	0.515948	3.01297	0.741685	2681.97	66.1074	2704.77	38.3922	2721.84	44.9065	2721.84	44.9065	98.5352
-Spot 26	105.34	23702.9	1.95109	13.5314	1.74705	1.84996	6.0865	0.181553	5.83038	0.95792	1075.46	57.7534	1063.42	40.1372	1038.77	35.2935	1038.77	35.2935	103.531
-Spot 27	78.7407	79530.6	1.45094	5.61169	1.7668	12.3629	3.0216	0.503167	2.45122	0.811233	2627.39	52.8951	2632.36	28.3922	2636.17	29.3515	2636.17	29.3515	99.6669
-Spot 28	251.982	135734	3.30557	5.24239	1.62672	13.1089	4.91808	0.49842	4.64126	0.943714	2607	99.5293	2687.52	46.4303	2748.65	26.7401	2748.65	26.7401	94.8467
-Spot 29	333.332	87378.6	1.29294	5.64854	1.37209	11.1973	2.29509	0.458721	1.83979	0.801617	2433.91	37.2964	2539.69	21.3966	2625.29	22.8166	2625.29	22.8166	92.71
-Spot 30	185.576	213295	2.09248	13.4084	2.11892	1.79016	3.45217	0.174088	2.72538	0.789467	1034.59	26.0504	1041.88	22.4935	1057.23	42.6836	1057.23	42.6836	97.8587
-Spot 31	71.0088	39496.9	2.17224	13.4503	2.58114	1.84103	3.49637	0.179594	2.35847	0.674546	1064.75	23.1477	1060.23	23.0095	1050.95	52.0238	1050.95	52.0238	101.314
-Spot 32	263.997	59947.6	1.50408	5.4269	1.3816	10.1227	5.44547	0.398424	5.26729	0.967279	2161.78	96.7486	2446.04	50.3625	2691.64	22.8306	2691.64	22.8306	80.3146
-Spot 33	118.358	76483.8	1.38023	5.43182	1.31326	12.8816	2.89002	0.507476	2.5744	0.890792	2645.84	55.8689	2671.03	27.2373	2690.14	21.704	2690.14	21.704	98.3533
-Spot 35	90.3961	50192.6	1.14135	5.60314	2.11791	11.98	5.08236	0.486843	4.62005	0.909036	2557	97.5263	2602.85	47.6647	2638.7	35.178	2638.7	35.178	96.9037
-Spot 36	166.455	113590	1.16597	5.40402	1.57392	13.3257	4.26598	0.522284	3.96502	0.92945	2708.86	87.7003	2703.01	40.3136	2698.62	25.9924	2698.62	25.9924	100.379
-Spot 38	144.388	53793.9	2.09702	5.6836	1.15109	12.1786	3.028	0.502019	2.80067	0.924926	2622.47	60.3446	2618.26	28.4202	2615	19.1597	2615	19.1597	100.286
-Spot 39	248.189	64823	1.98793	13.3832	1.86087	1.76701	3.07813	0.171513	2.45194	0.79657	1020.44	23.1409	1033.42	19.9619	1061.01	37.4594	1061.01	37.4594	96.1761
-Spot 41	242.905	154680	1.88644	13.3746	1.95018	1.9167	2.99171	0.185923	2.26873	0.75834	1099.25	22.9287	1086.92	19.965	1062.31	39.2553	1062.31	39.2553	103.477
-Spot 42	134.672	34228	1.4449	5.43563	1.154	13.0946	3.23822	0.516229	3.02561	0.934345	2683.17	66.4086	2686.49	30.5567	2688.98	19.0735	2688.98	19.0735	99.7837
-Spot 43	332.889	112345	3.97538	5.48509	1.75407	12.0909	2.83033	0.480997	2.22126	0.784807	2531.61	46.5066	2611.48	26.5495	2674.01	29.0356	2674.01	29.0356	94.6747
-Spot 44	63.6675	95210.7	1.32551	5.41125	1.5994	12.7886	4.4701	0.501903	4.17417	0.933799	2621.97	89.928	2664.21	42.121	2696.41	26.4187	2696.41	26.4187	97.2392
-Spot 45	88.8759	51343.8	2.88903	12.5544	2.2228	2.09375	5.0887	0.190643	4.57756	0.899553	1124.86	47.2496	1146.76	34.9823	1188.43	43.9166	1188.43	43.9166	94.6503
-Spot 47	153.409	162896	1.78562	5.42543	1.90215	12.8981	3.14263	0.507526	2.50158	0.796016	2646.06	54.2921	2672.24	29.6221	2692.09	31.4339	2692.09	31.4339	98.2901
-Spot 48	124.214	183596	2.07091	5.66544	1.81263	11.9614	5.0114	0.491489	4.67209	0.932294	2577.12	99.2563	2601.39	46.9925	2620.32	30.1558	2620.32	30.1558	98.3511
-Spot 49	261.465	40664.6	4.26522	12.4962	1.66656	2.29861	2.65757	0.208325	2.07008	0.778939	1219.89	23.0073	1211.86	18.8061	1197.61	32.8861	1197.61	32.8861	101.86
-Spot 50	302.881	340456	2.28008	4.874	1.74939	15.7192	3.19905	0.555667	2.67835	0.837232	2848.7	61.6733	2859.88	30.549	2867.76	28.449	2867.76	28.449	99.3352
-Spot 51	122.196	40006.6	2.81086	13.3223	2.73057	1.82988	3.80519	0.176808	2.65018	0.696465	1049.51	25.668	1056.24	24.989	1070.18	54.8785	1070.18	54.8785	98.0686
-Spot 52	217.991	183889	1.79559	5.40703	1.62963	12.8213	2.29999	0.502792	1.62304	0.705673	2625.79	35.006	2666.61	21.6673	2697.7	26.915	2697.7	26.915	97.3342
-Spot 53	37.2248	152209	1.69628	5.43413	1.81646	12.7425	3.07597	0.502209	2.48235	0.807015	2623.28	53.499	2660.81	28.968	2689.44	30.0248	2689.44	30.0248	97.54
-Spot 54	53.5311	59248.6	2.2064	5.33943	2.22692	13.415	4.59628	0.519499	4.02077	0.874788	2697.06	88.6215	2709.32	43.4588	2718.46	36.7091	2718.46	36.7091	99.2125
-Spot 55	119.647	54626.2	1.28944	13.3324	2.28382	1.91798	3.33361	0.18546	2.4284	0.72846	1096.74	24.4909	1087.36	22.2523	1068.66	45.9068	1068.66	45.9068	102.628
-Spot 56	206.969	71343.7	1.80215	12.2662	1.26177	2.21828	2.5243	0.197346	2.18633	0.866113	1161.04	23.2297	1186.83	17.6688	1234.14	24.7572	1234.14	24.7572	94.0774
-Spot 57	228.674	1.9817e+06	1.9288	5.55408	1.16186	12.6736	4.70644	0.510519	4.56077	0.969049	2658.84	99.3749	2655.7	44.3216	2653.29	19.2684	2653.29	19.2684	100.209
-Spot 58	113.057	4.24148e+07	1.32718	5.44499	1.30554	12.3745	2.25234	0.488677	1.83538	0.814876	2564.95	38.8393	2633.24	21.163	2686.15	21.5845	2686.15	21.5845	95.4881
-Spot 61	216.058	58157.7	2.03071	13.2244	1.4294	1.87284	2.67436	0.179628	2.26031	0.845179	1064.94	22.188	1071.53	17.7044	1084.99	28.6419	1084.99	28.6419	98.1523
-Spot 62	108.931	150461	3.83626	11.7153	2.31981	2.61921	3.92571	0.222548	3.16696	0.806724	1295.33	37.1642	1306.04	28.855	1323.67	44.9391	1323.67	44.9391	97.8587
-Spot 63	192.741	43543.9	1.64326	13.5792	2.23705	1.83933	3.90412	0.181148	3.19966	0.819559	1073.24	31.634	1059.62	25.6856	1031.65	45.2177	1031.65	45.2177	104.032
-Spot 64	269.043	237505	2.11738	11.8459	1.38544	2.56779	2.78122	0.220611	2.41158	0.867096	1285.1	28.0978	1291.51	20.3275	1302.17	26.9177	1302.17	26.9177	98.6896
-Spot 65	429.852	105158	3.01583	13.1924	1.60969	1.90022	2.46764	0.181814	1.87033	0.757945	1076.88	18.5488	1081.17	16.4181	1089.82	32.2406	1089.82	32.2406	98.8121
-Spot 67	95.9858	43780.2	2.81065	11.76	1.87854	2.67661	3.34867	0.228292	2.77213	0.827829	1325.54	33.2143	1322.02	24.7586	1316.3	36.4267	1316.3	36.4267	100.702
-Spot 68	388.702	56138.2	14.1539	5.50643	0.819981	12.6278	2.72582	0.504309	2.59957	0.953681	2632.29	56.181	2652.3	25.652	2667.58	13.5821	2667.58	13.5821	98.6771
-Spot 69	48.2366	74729.7	2.02028	5.18317	1.5389	14.2053	2.35418	0.534005	1.78156	0.756763	2758.3	39.9799	2763.51	22.3355	2767.31	25.2527	2767.31	25.2527	99.6747
-Spot 70	73.5011	242557	1.33966	5.85626	2.00303	11.9027	2.98726	0.505549	2.21622	0.741888	2637.6	47.974	2596.77	27.9884	2565.07	33.5034	2565.07	33.5034	102.828
-Spot 71	97.8573	101245	3.57061	8.78595	1.5396	4.95393	3.20784	0.315673	2.81422	0.877296	1768.56	43.5284	1811.5	27.1076	1861.23	27.8048	1861.23	27.8048	95.0209
-Spot 72	105.463	102580	1.27454	5.56693	1.17932	12.1105	3.96463	0.488963	3.78517	0.954734	2566.19	80.1343	2613	37.2023	2649.46	19.5651	2649.46	19.5651	96.857
-Spot 73	299.831	248794	2.46589	13.1218	1.50716	1.91285	2.8585	0.182042	2.42889	0.849708	1078.12	24.1139	1085.58	19.0626	1100.58	30.1308	1100.58	30.1308	97.9588
-Spot 74	214.283	162884	0.670933	5.60938	1.4265	12.7628	2.30278	0.519231	1.80774	0.785024	2695.92	39.8287	2662.31	21.6864	2636.86	23.6952	2636.86	23.6952	102.24
-Spot 75	97.2312	33427.3	2.31568	5.3645	1.67916	13.2755	3.19899	0.51651	2.72286	0.851163	2684.36	59.7847	2699.44	30.2156	2710.74	27.6961	2710.74	27.6961	99.027
-Spot 76	166.894	96527.5	0.766832	5.368	1.47565	13.2778	3.36777	0.516937	3.02727	0.898893	2686.18	66.505	2699.61	31.8112	2709.66	24.3441	2709.66	24.3441	99.1333
-Spot 77	239.203	30749.4	3.65292	13.8756	2.24651	1.6678	3.61404	0.16784	2.83099	0.783331	1000.2	26.2283	996.348	22.945	987.862	45.7041	987.862	45.7041	101.249
-Spot 78	173.215	125233	1.16463	5.42225	1.5731	12.2265	2.89401	0.480818	2.42913	0.839363	2530.83	50.846	2621.95	27.1701	2693.06	25.9925	2693.06	25.9925	93.976
-Spot 79	340.175	123129	14.7018	5.57074	1.40268	12.7146	5.29277	0.513704	5.10352	0.964244	2672.42	111.662	2658.74	49.8634	2648.33	23.2741	2648.33	23.2741	100.91
-Spot 80	126.699	83599	1.61263	13.1167	2.02506	1.87781	3.25139	0.178639	2.54375	0.782358	1059.53	24.8536	1073.29	21.5453	1101.33	40.4958	1101.33	40.4958	96.2054
-Spot 81	152.604	75312.3	3.56214	5.30746	1.80133	13.686	2.74998	0.526822	2.07789	0.755602	2728.05	46.2194	2728.23	26.0273	2728.36	29.6667	2728.36	29.6667	99.9887
-Spot 83	208.226	82918.5	1.78039	5.39299	1.66609	12.8559	3.71173	0.50284	3.31679	0.893597	2625.99	71.5437	2669.15	34.9821	2702	27.5062	2702	27.5062	97.1871
-Spot 84	237.562	743134	2.69655	13.2588	1.41801	1.89807	2.75764	0.182522	2.36513	0.857664	1080.74	23.5331	1080.41	18.3408	1079.74	28.4363	1079.74	28.4363	100.092
-Spot 85	142.752	1.15851e+06	4.08111	12.315	1.81068	2.30126	5.81158	0.205541	5.52231	0.950225	1205.02	60.6973	1212.68	41.1574	1226.31	35.5452	1226.31	35.5452	98.2637
-Spot 87	230.74	125847	1.38459	5.36398	1.57386	13.0969	3.74945	0.509512	3.40313	0.907636	2654.55	74.0516	2686.66	35.3849	2710.9	25.9583	2710.9	25.9583	97.9214
-Spot 88	85.0657	49872.5	1.02937	5.44723	1.6384	12.5849	3.86159	0.497192	3.49678	0.90553	2601.72	74.8606	2649.09	36.3391	2685.47	27.0911	2685.47	27.0911	96.8814
-Spot 89	218.614	92030.5	4.69502	10.91	2.53662	3.19355	4.74559	0.252696	4.01076	0.845155	1452.36	52.1563	1455.6	36.7114	1460.31	48.225	1460.31	48.225	99.4559
-Spot 90	223.325	148526	2.19167	5.5111	2.27292	12.6928	3.87236	0.507334	3.13512	0.809616	2645.24	68.0256	2657.12	36.4634	2666.17	37.6519	2666.17	37.6519	99.2147
-Spot 91	82.0731	19310	2.42754	13.5814	1.94114	1.77888	3.18863	0.175223	2.5297	0.793348	1040.82	24.3141	1037.77	20.7287	1031.33	39.2569	1031.33	39.2569	100.921
-Spot 92	251.948	113654	1.57308	11.5243	1.29216	2.87041	2.00403	0.239915	1.53182	0.764367	1386.25	19.1069	1374.18	15.0922	1355.45	24.9181	1355.45	24.9181	102.273
-Spot 93	189.81	52912.9	2.27829	11.559	1.70019	2.69366	2.57701	0.22582	1.93658	0.751483	1312.56	22.9981	1326.72	19.0846	1349.64	32.8149	1349.64	32.8149	97.2525
-Spot 94	307.01	70086.5	2.04482	13.3914	1.34044	1.85342	2.90875	0.180011	2.58149	0.88749	1067.04	25.3866	1064.65	19.1865	1059.78	26.9885	1059.78	26.9885	100.685
-Spot 95	249.753	106969	1.91148	5.4461	1.60452	12.8487	2.76521	0.507508	2.25209	0.814438	2645.98	48.8761	2668.62	26.0558	2685.81	26.5297	2685.81	26.5297	98.5171
-Spot 96	449.57	63107.8	3.525	13.2527	1.7469	1.91786	2.87846	0.18434	2.28777	0.794789	1090.64	22.9549	1087.32	19.213	1080.69	35.0493	1080.69	35.0493	100.921
-Spot 97	83.695	221073	1.38201	5.55422	1.52268	12.533	2.26691	0.504869	1.67939	0.740827	2634.69	36.3207	2645.21	21.3201	2653.25	25.2538	2653.25	25.2538	99.3002
-Spot 98	118.846	24274.2	2.13666	13.229	2.26338	1.90459	5.48744	0.182738	4.99891	0.910973	1081.91	49.79	1082.69	36.5514	1084.29	45.39	1084.29	45.39	99.7811
-Spot 99	261.277	126490	3.86249	12.7966	1.67449	2.11203	3.23441	0.196017	2.76722	0.855555	1153.89	29.2362	1152.74	22.2921	1150.57	33.252	1150.57	33.252	100.289
-Spot 100	79.1867	21141.9	2.3136	14.0563	2.59373	1.62502	3.79187	0.165663	2.76601	0.729459	988.174	25.3413	979.933	23.8391	961.532	52.9942	961.532	52.9942	102.771
-Spot 101	216.624	62509.6	1.89865	13.2446	2.25821	1.88304	2.89692	0.180883	1.81456	0.626377	1071.8	17.9178	1075.13	19.2144	1081.91	45.304	1081.91	45.304	99.0651
-Spot 102	98.9866	50681.8	0.922438	5.41918	1.36915	13.0806	6.29793	0.514115	6.1473	0.976083	2674.17	134.576	2685.48	59.4744	2693.99	22.6198	2693.99	22.6198	99.2644
-Spot 103	184.576	27760.1	2.1522	12.2918	1.58783	2.20379	3.62566	0.196465	3.25948	0.899004	1156.3	34.503	1182.25	25.3287	1230.05	31.164	1230.05	31.164	94.0048
-Spot 104	121.597	208771	1.18672	5.14639	3.85158	13.775	5.12447	0.514153	3.38018	0.659614	2674.33	73.9944	2734.36	48.5483	2778.99	63.1554	2778.99	63.1554	96.2341
-Spot 105	78.1796	43107	1.33543	5.4248	1.8692	13.3689	3.3343	0.525993	2.7611	0.828089	2724.55	61.3537	2706.07	31.5099	2692.28	30.8886	2692.28	30.8886	101.198
-Spot 106	139.709	67191.4	2.18965	12.672	2.32547	2.19957	3.15313	0.202154	2.12942	0.675336	1186.88	23.0836	1180.91	22.0133	1169.96	46.0486	1169.96	46.0486	101.447
-Spot 107	98.9911	1.20638e+06	1.4655	13.4629	2.42451	1.90278	4.95762	0.185791	4.32432	0.872257	1098.54	43.6777	1082.06	33.0089	1049.06	48.8993	1049.06	48.8993	104.716
-Spot 108	99.4769	147019	0.980032	5.58142	1.83782	12.5615	2.72731	0.508491	2.0151	0.738861	2650.19	43.7887	2647.34	25.6561	2645.15	30.5055	2645.15	30.5055	100.19
-Spot 109	66.8577	32677.2	1.46876	5.55919	1.63755	11.7829	3.62927	0.475076	3.23883	0.892419	2505.78	67.2467	2587.31	33.9808	2651.77	27.1634	2651.77	27.1634	94.4947
-Spot 110	78.6144	47591.2	2.44563	11.115	2.06003	2.99234	3.24012	0.241224	2.50094	0.771864	1393.06	31.3325	1405.67	24.6638	1424.83	39.3502	1424.83	39.3502	97.7698
-Spot 165	135.748	25736.9	2.17217	11.7984	2.15838	2.68537	5.55213	0.229787	5.11542	0.921344	1333.38	61.6181	1324.44	41.1007	1309.97	41.885	1309.97	41.885	101.787
Sample 18BH2A - Middle Ordovician Winnipeg Formation
							Isotope ratios						Apparent ages (Ma)
Analysis	U	206Pb	U/Th	206Pb*	±	207Pb*	±	206Pb*	±	error	206Pb*	±	207Pb*	±	206Pb*	±	Best age	±	Conc
	(ppm)	204Pb		207Pb*	(%)	235U*	(%)	238U	(%)	corr.	238U*	(Ma)	235U	(Ma)	207Pb*	(Ma)	(Ma)	(Ma)	(%)
18BH2A-1 <>	97.1282	89105.1	0.649203	8.74974	0.796436	5.37441	1.70486	0.341056	1.50739	0.884174	1891.75	24.7129	1880.79	14.5962	1868.69	14.3709	1868.69	14.3709	101.234
18BH2A-2 <>	76.435	34693.5	0.526032	8.8505	0.528322	5.04962	2.54123	0.324134	2.4857	0.97815	1809.89	39.2252	1827.68	21.5412	1848.01	9.55486	1848.01	9.55486	97.9373
18BH2A-3 <>	97.2797	109094	0.986785	8.2016	0.751971	6.15779	1.26524	0.366288	1.01754	0.804222	2011.91	17.5853	1998.48	11.0527	1984.61	13.3835	1984.61	13.3835	101.376
18BH2A-4 <>	120.343	19723.3	0.583643	8.50331	0.978241	5.39936	1.32878	0.332989	0.899273	0.676768	1852.85	14.4815	1884.75	11.3843	1920.07	17.5415	1920.07	17.5415	96.4989
18BH2A-5 <>	26.4753	76047.2	0.703918	5.35022	1.04692	13.6185	1.73883	0.528445	1.38834	0.798433	2734.9	30.9433	2723.55	16.4495	2715.13	17.2642	2715.13	17.2642	100.728
18BH2A-6 <>	165.32	109098	5.44748	12.2422	1.12077	2.30793	2.94864	0.204919	2.72733	0.924946	1201.69	29.9009	1214.73	20.892	1237.98	21.9565	1237.98	21.9565	97.0688
18BH2A-7 <>	121.349	49739	1.77245	8.83533	0.974579	5.43487	1.22674	0.348266	0.74504	0.607333	1926.31	12.406	1890.37	10.5208	1851.11	17.6209	1851.11	17.6209	104.063
18BH2A-8 <>	93.2419	48259.7	1.48104	8.37042	0.914516	5.72651	2.19765	0.347645	1.99833	0.909303	1923.35	33.2315	1935.38	18.9993	1948.27	16.344	1948.27	16.344	98.7207
18BH2A-9 <>	26.1515	5859.33	9.64452	7.89694	2.6135	6.82449	3.3701	0.390866	2.12772	0.631353	2126.84	38.5462	2088.91	29.8546	2051.71	46.1599	2051.71	46.1599	103.662
18BH2A-10 <>	104.717	71437.7	2.02227	5.69894	0.797261	11.8138	1.51778	0.488295	1.29152	0.850928	2563.3	27.3158	2589.76	14.2095	2610.51	13.2781	2610.51	13.2781	98.1914
18BH2A-11 <>	76.17	75507.2	1.18825	4.97164	0.758122	15.9078	1.20171	0.5736	0.932393	0.775889	2922.59	21.9096	2871.28	11.4808	2835.46	12.3614	2835.46	12.3614	103.073
18BH2A-12 <>	231.134	71255	1.48225	9.29721	0.52217	4.57651	0.771282	0.308593	0.567639	0.735969	1733.78	8.62923	1745	6.42718	1758.46	9.54986	1758.46	9.54986	98.5967
18BH2A-13 <>	91.9238	30185.4	2.24732	8.92276	1.16877	4.85303	2.59935	0.314059	2.32177	0.893212	1760.65	35.7717	1794.14	21.8874	1833.28	21.1764	1833.28	21.1764	96.0381
18BH2A-14 <>	76.4861	202842	0.453853	5.34402	0.89739	13.6705	1.62821	0.529846	1.35858	0.834404	2740.8	30.3326	2727.15	15.4068	2717.04	14.7956	2717.04	14.7956	100.875
18BH2A-15 <>	83.4639	28605.4	7.31337	8.68513	0.930064	5.40823	1.32526	0.340667	0.944084	0.712376	1889.88	15.4646	1886.16	11.3571	1882.05	16.7533	1882.05	16.7533	100.416
18BH2A-16 <>	70.4021	13310.5	1.09772	5.51043	1.38284	11.7255	2.38309	0.468613	1.94084	0.814422	2477.48	39.9229	2582.73	22.2996	2666.38	22.9055	2666.38	22.9055	92.9155
18BH2A-17 <>	122.593	62948.8	0.856551	8.74992	0.771925	5.37628	1.21588	0.341181	0.939414	0.77262	1892.35	15.4054	1881.08	10.41	1868.65	13.9287	1868.65	13.9287	101.268
18BH2A-18 <>	38.5628	9243.93	0.533424	8.42677	2.93293	5.28894	3.52841	0.323242	1.96153	0.555924	1805.54	30.889	1867.08	30.1389	1936.27	52.5019	1936.27	52.5019	93.2486
18BH2A-19 <>	73.9061	11166.2	3.5978	12.2648	1.5612	2.00103	2.57686	0.177998	2.05009	0.795577	1056.03	19.9693	1115.86	17.4481	1234.36	30.6266	1234.36	30.6266	85.5524
18BH2A-20 <>	58.3663	80101.5	1.01205	4.93688	0.746192	15.2608	1.45893	0.546421	1.25366	0.859303	2810.27	28.5563	2831.65	13.9036	2846.9	12.1582	2846.9	12.1582	98.7135
18BH2A-21 <>	44.063	44789.8	0.778122	8.92331	0.575019	4.9	2.18202	0.317118	2.10489	0.964652	1775.64	32.6698	1802.26	18.4026	1833.17	10.4203	1833.17	10.4203	96.8615
18BH2A-22 <>	139.965	208736	1.65089	8.87253	0.833071	5.20198	2.63014	0.334746	2.49472	0.948512	1861.34	40.3332	1852.94	22.4036	1843.51	15.0758	1843.51	15.0758	100.967
18BH2A-23 <>	91.4232	115491	1.75897	5.40653	0.770493	13.5128	2.41999	0.529861	2.29406	0.947961	2740.87	51.2203	2716.18	22.8829	2697.86	12.723	2697.86	12.723	101.594
18BH2A-25 <>	149.987	64754.9	1.97877	8.82802	0.521512	5.32858	0.951706	0.341172	0.796097	0.836494	1892.31	13.0549	1873.46	8.13668	1852.6	9.42644	1852.6	9.42644	102.143
18BH2A-26 <>	47.7349	41138.2	0.749585	7.68257	0.537555	6.97415	1.47133	0.388594	1.36962	0.930869	2116.31	24.7082	2108.14	13.0669	2100.17	9.44154	2100.17	9.44154	100.768
18BH2A-27 <>	113.499	116340	1.30854	8.80303	0.607381	5.25801	1.66439	0.335701	1.54961	0.931036	1865.95	25.1065	1862.07	14.2004	1857.72	10.9721	1857.72	10.9721	100.443
18BH2A-28 <>	94.1758	149205	0.753657	6.80912	0.860343	8.59793	1.32475	0.424603	1.00736	0.760416	2281.34	19.3551	2296.34	12.0504	2309.69	14.7674	2309.69	14.7674	98.7729
18BH2A-29 <>	85.0034	40395.1	1.64748	9.42938	2.14249	4.62217	2.74806	0.316102	1.72091	0.626228	1770.67	26.6451	1753.28	22.9441	1732.6	39.311	1732.6	39.311	102.197
18BH2A-30 <>	64.6757	20555.3	1.74581	8.68097	0.649543	5.07832	4.49471	0.319733	4.44753	0.989503	1788.43	69.4633	1832.49	38.1481	1882.91	11.6983	1882.91	11.6983	94.9818
18BH2A-31 <>	42.0034	39100.5	1.05493	8.7509	0.889227	5.45963	3.55195	0.346509	3.43884	0.968156	1917.91	57.0488	1894.27	30.4918	1868.45	16.0438	1868.45	16.0438	102.647
18BH2A-32 <>	59.6459	53294.6	1.77576	8.77973	0.552514	5.09581	0.851582	0.324484	0.648012	0.760951	1811.59	10.2341	1835.41	7.22845	1862.51	9.97503	1862.51	9.97503	97.2659
18BH2A-33 <>	45.0648	28553.7	2.84442	8.97329	0.626324	5.11428	1.30153	0.33284	1.14093	0.8766	1852.13	18.3668	1838.48	11.0546	1823.04	11.3622	1823.04	11.3622	101.595
18BH2A-34 <>	45.4634	37835.1	1.8409	6.85749	1.68119	8.91776	1.83431	0.443526	0.733667	0.39997	2366.41	14.5316	2329.62	16.7488	2297.53	28.8982	2297.53	28.8982	102.998
18BH2A-35 <>	66.0995	60759.8	0.618726	8.90588	0.854109	4.68027	1.63392	0.302306	1.39291	0.852495	1702.73	20.8438	1763.72	13.6707	1836.72	15.4713	1836.72	15.4713	92.7054
18BH2A-37 <>	42.8762	32147.1	1.19391	5.78261	0.496038	11.8483	1.19805	0.496912	1.09053	0.910259	2600.51	23.3368	2592.49	11.2184	2586.21	8.2804	2586.21	8.2804	100.553
18BH2A-38 <>	124.615	191818	2.52675	8.94943	0.758361	5.12204	1.12806	0.332458	0.835114	0.740308	1850.28	13.4322	1839.77	9.58347	1827.87	13.7498	1827.87	13.7498	101.226
18BH2A-39 <>	103.056	75469.4	1.04892	8.94128	0.642785	5.13458	1.37301	0.332969	1.21326	0.883646	1852.76	19.5369	1841.85	11.6693	1829.53	11.6535	1829.53	11.6535	101.27
18BH2A-40 <>	147.574	223982	2.11774	8.88668	0.652282	5.27697	1.7304	0.340113	1.60276	0.926232	1887.21	26.2222	1865.14	14.7721	1840.62	11.8097	1840.62	11.8097	102.531
18BH2A-42 <>	41.8385	29634.1	1.5299	8.94364	1.13315	5.28498	2.04713	0.342813	1.70491	0.832827	1900.19	28.0584	1866.44	17.4807	1829.05	20.5435	1829.05	20.5435	103.889
18BH2A-44 <>	37.9126	31667.5	1.48837	8.70102	0.995499	5.15406	3.94383	0.325251	3.81612	0.967618	1815.32	60.3772	1845.06	33.5501	1878.76	17.9392	1878.76	17.9392	96.6235
18BH2A-43 <>	42.0645	42196.8	0.473431	5.34924	0.972848	13.917	1.6365	0.539927	1.31595	0.80412	2783.14	29.7437	2744.07	15.504	2715.44	16.0421	2715.44	16.0421	102.493
18BH2A-45 <>	80.827	51442.5	2.82537	9.4834	0.656189	4.67247	1.29776	0.321373	1.11965	0.86275	1796.43	17.5543	1762.32	10.8547	1722.11	12.0556	1722.11	12.0556	104.315
18BH2A-46 <>	76.9496	88256.4	4.2599	5.72419	0.799667	12.2805	1.33428	0.509835	1.06809	0.800505	2655.92	23.2504	2626.08	12.5285	2603.14	13.3244	2603.14	13.3244	102.028
18BH2A-47 <>	62.2668	28454	1.43459	8.70506	1.16723	5.47232	1.5487	0.345495	1.01787	0.65724	1913.05	16.8489	1896.26	13.2964	1877.92	21.0366	1877.92	21.0366	101.871
18BH2A-49 <>	47.7313	94962.4	1.30659	5.9231	1.12539	11.7136	1.22322	0.503197	0.479329	0.391859	2627.52	10.3437	2581.79	11.4439	2546.07	18.8577	2546.07	18.8577	103.199
18BH2A-50 <>	99.2086	52396.2	0.660317	9.08003	0.938264	5.02684	1.50349	0.331041	1.17479	0.781377	1843.42	18.8352	1823.85	12.7338	1801.57	17.067	1801.57	17.067	102.323
18BH2A-51 <>	23.711	43701	1.18047	6.78329	0.888408	8.66533	8.77294	0.426309	8.72784	0.994859	2289.06	168.203	2303.44	80.0279	2316.21	15.2388	2316.21	15.2388	98.8277
18BH2A-52 <>	7.98804	16533.4	1.01743	5.32002	1.54264	13.1595	4.90795	0.507751	4.65921	0.949319	2647.02	101.155	2691.16	46.3472	2724.46	25.4144	2724.46	25.4144	97.1576
18BH2A-53 <>	104.99	15756.3	1.11531	7.59035	0.51095	6.16781	0.940124	0.33954	0.789153	0.839414	1884.46	12.8948	1999.9	8.21427	2121.35	8.95309	2121.35	8.95309	88.8328
18BH2A-54 <>	34.8031	35079.7	0.8758	5.34578	0.493873	12.9888	4.82261	0.503593	4.79725	0.994742	2629.22	103.585	2678.84	45.4979	2716.5	8.14292	2716.5	8.14292	96.7869
18BH2A-55 <>	62.2823	129761	1.92839	8.92542	0.550221	4.93006	3.25345	0.319139	3.20659	0.985596	1785.52	50.0103	1807.42	27.4709	1832.74	9.9714	1832.74	9.9714	97.4234
18BH2A-54 <>	21.1797	36805.2	0.69268	9.03276	0.799224	4.93687	2.30282	0.323423	2.15968	0.937842	1806.42	34.0239	1808.58	19.4463	1811.05	14.5206	1811.05	14.5206	99.7443
18BH2A-56 <>	100.991	178092	1.23984	8.46447	0.602087	5.72255	1.29029	0.351308	1.1412	0.884453	1940.84	19.1256	1934.78	11.1529	1928.28	10.785	1928.28	10.785	100.652
18BH2A-57 <>	25.9089	21849.6	0.816882	8.71901	1.32534	5.44158	2.8163	0.344105	2.48496	0.882348	1906.39	41.011	1891.43	24.1614	1875.03	23.893	1875.03	23.893	101.672
18BH2A-58 <>	64.1042	50571.6	1.53923	8.88253	0.672202	5.19131	4.00041	0.334435	3.94353	0.985781	1859.84	63.7136	1851.19	34.0715	1841.47	12.1691	1841.47	12.1691	100.998
18BH2A-66 <>	109.632	108986	3.39587	5.54086	1.10919	12.2963	4.61678	0.494139	4.48156	0.970711	2588.56	95.5514	2627.29	43.3787	2657.25	18.3878	2657.25	18.3878	97.4149
18BH2A-67 <>	43.5769	38884.2	0.511668	6.71632	0.917309	9.41839	1.16087	0.458783	0.711455	0.612863	2434.18	14.4239	2379.62	10.6563	2333.22	15.7063	2333.22	15.7063	104.327
18BH2A-68 <>	84.2017	85486	0.996501	8.68012	2.21641	5.23757	2.68418	0.329727	1.51405	0.564065	1837.06	24.2021	1858.75	22.8892	1883.09	39.9243	1883.09	39.9243	97.5556
18BH2A-69 <>	54.9424	68273.2	0.589726	8.77092	0.544198	5.46449	1.46271	0.347611	1.35771	0.928214	1923.18	22.5765	1895.03	12.5553	1864.32	9.82462	1864.32	9.82462	103.157
18BH2A-70 <>	36.1278	58849.1	1.12776	8.59097	0.668999	5.6478	1.83636	0.351901	1.71017	0.931279	1943.67	28.6969	1923.43	15.8426	1901.66	12.0218	1901.66	12.0218	102.209
18BH2A-71 <>	56.4997	107153	0.808241	5.35033	0.911426	13.4634	1.87506	0.522439	1.63865	0.873916	2709.52	36.2497	2712.72	17.7245	2715.1	15.0297	2715.1	15.0297	99.7944
18BH2A-72 <>	81.0572	60524.8	2.6648	5.31384	0.686203	13.5873	0.809205	0.523648	0.42888	0.530002	2714.63	9.50187	2721.38	7.65341	2726.38	11.3002	2726.38	11.3002	99.5692
18BH2A-73 <>	32.3074	50401.1	1.54982	7.70879	0.902598	6.54159	3.43711	0.365736	3.31648	0.964904	2009.31	57.2543	2051.51	30.2812	2094.19	15.8641	2094.19	15.8641	95.9469
18BH2A-74 <>	94.9908	33115.4	1.24999	16.8914	1.30399	0.716888	3.23248	0.0878244	2.95779	0.915023	542.658	15.3937	548.828	13.7057	574.508	28.3555	542.658	15.3937	94.456
18BH2A-75 <>	45.5592	75098.1	1.40754	5.75887	0.868886	11.7088	2.06723	0.489046	1.87576	0.907379	2566.55	39.714	2581.41	19.341	2593.08	14.492	2593.08	14.492	98.9768
18BH2A-76 <>	40.3665	33902.2	0.695496	8.0668	3.52468	6.17801	3.82993	0.36145	1.49835	0.391221	1989.04	25.6437	2001.34	33.4829	2014.05	62.5294	2014.05	62.5294	98.7587
18BH2A-77 <>	34.754	95684.3	1.08805	5.35958	0.981825	13.3208	2.11465	0.517796	1.8729	0.88568	2689.83	41.1893	2702.66	19.975	2712.25	16.1951	2712.25	16.1951	99.1733
18BH2A-78 <>	28.888	91953.5	2.24004	5.28453	0.633892	13.5946	1.02652	0.521039	0.807414	0.786557	2703.58	17.8297	2721.89	9.7092	2735.48	10.4299	2735.48	10.4299	98.834
18BH2A-79 <>	68.1879	53176.5	0.525039	8.773	0.63434	5.3325	1.77401	0.339295	1.65672	0.933885	1883.28	27.0565	1874.09	15.1696	1863.9	11.4507	1863.9	11.4507	101.04
18BH2A-81 <>	45.8883	50983.4	0.56325	8.7396	0.692121	5.3725	1.25078	0.340539	1.04184	0.832949	1889.26	17.0611	1880.48	10.7077	1870.78	12.4854	1870.78	12.4854	100.988
18BH2A-82 <>	101.264	504474	1.47025	8.82486	0.763483	5.22877	1.6944	0.334662	1.51264	0.89273	1860.94	24.4507	1857.32	14.4435	1853.25	13.8	1853.25	13.8	100.415
18BH2A-83 <>	88.4215	155158	1.12853	5.51003	0.687879	13.2547	0.833496	0.52969	0.470678	0.564704	2740.14	10.5066	2697.96	7.86962	2666.5	11.3951	2666.5	11.3951	102.762
18BH2A-84 <>	19.7952	53715.4	0.966046	8.84322	1.14813	5.2053	3.02423	0.333852	2.79781	0.925132	1857.03	45.143	1853.48	25.7644	1849.49	20.7634	1849.49	20.7634	100.407
18BH2A-85 <>	45.9305	105319	1.73823	8.88168	0.669607	5.26627	3.72489	0.339232	3.66421	0.983709	1882.97	59.8346	1863.41	31.7965	1841.64	12.1218	1841.64	12.1218	102.244
18BH2A-86 <>	58.7937	31312.3	1.17061	9.55705	0.514327	4.34092	2.458	0.300887	2.40359	0.977863	1695.71	35.8383	1701.17	20.2878	1707.89	9.46443	1707.89	9.46443	99.2868
18BH2A-87 <>	91.2415	57150.6	1.19108	8.27891	0.690273	6.20558	1.09293	0.37261	0.847362	0.775311	2041.67	14.8284	2005.24	9.5576	1967.89	12.3074	1967.89	12.3074	103.749
18BH2A-88 <>	59.0175	28704.1	1.274	8.72822	0.911351	5.21439	1.97597	0.330087	1.75326	0.887288	1838.8	28.0488	1854.97	16.8367	1873.13	16.4357	1873.13	16.4357	98.1673
18BH2A-89 <>	98.5599	213503	2.24179	6.13664	1.49277	10.4965	1.56415	0.467167	0.467141	0.298654	2471.13	9.58869	2479.61	14.5016	2486.55	25.1606	2486.55	25.1606	99.3799
18BH2A-90 <>	187.119	187509	1.63231	8.93172	0.656449	5.12301	1.78851	0.331863	1.66369	0.930207	1847.41	26.7234	1839.93	15.1955	1831.47	11.8984	1831.47	11.8984	100.87
18BH2A-91 <>	26.2236	47106.3	0.758295	9.06411	1.18958	5.18029	1.4808	0.340548	0.881845	0.595521	1889.3	14.4413	1849.38	12.6035	1804.76	21.6308	1804.76	21.6308	104.685
18BH2A-91 <>	32.1221	35209.9	0.88249	9.16835	0.702299	4.68294	2.73204	0.311393	2.64023	0.966395	1747.56	40.4149	1764.2	22.8632	1783.94	12.802	1783.94	12.802	97.9606
18BH2A-92 <>	36.0918	59269.5	0.481478	8.48692	0.67105	5.81989	2.56275	0.358232	2.47334	0.965109	1973.79	42.0531	1949.38	22.2097	1923.53	12.0273	1923.53	12.0273	102.613
18BH2A-93 <>	124.865	97232.5	1.07357	8.42938	0.530965	6.06394	2.0411	0.370723	1.97082	0.965572	2032.8	34.3613	1985.08	17.7929	1935.72	9.50242	1935.72	9.50242	105.015
18BH2A-95 <>	74.8381	42665.7	1.45848	9.29958	0.634791	4.82085	2.24127	0.325151	2.1495	0.959053	1814.84	34	1788.54	18.85	1757.99	11.6103	1757.99	11.6103	103.234
18BH2A-96 <>	133.776	81579	2.02399	6.81141	0.73379	8.70062	0.831109	0.429819	0.390249	0.469552	2304.9	7.56248	2307.14	7.56914	2309.11	12.5955	2309.11	12.5955	99.8178
18BH2A-97 <>	164.665	178970	1.93976	7.78536	0.890768	6.65823	1.86896	0.375955	1.64303	0.879114	2057.36	28.94	2067.1	16.5006	2076.8	15.6848	2076.8	15.6848	99.0642
18BH2A-98 <>	59.3423	47394.2	2.27207	8.11986	1.02751	6.03852	5.29788	0.355613	5.19728	0.981012	1961.35	87.8948	1981.42	46.1828	2002.41	18.248	2002.41	18.248	97.9493
18BH2A-99 <>	118.983	748411	1.20459	9.06831	0.979043	4.83383	3.59165	0.317919	3.45564	0.962131	1779.56	53.7384	1790.8	30.2267	1803.92	17.8038	1803.92	17.8038	98.6498
18BH2A-101 <>	214.065	251631	2.70198	5.70906	0.664299	11.8959	1.84498	0.492564	1.72124	0.93293	2581.76	36.6179	2596.25	17.2826	2607.55	11.0636	2607.55	11.0636	99.0108
18BH2A-102 <>	123.872	175737	1.76458	8.88668	0.735534	5.26528	0.897172	0.339359	0.513718	0.572597	1883.59	8.39085	1863.25	7.65587	1840.62	13.3151	1840.62	13.3151	102.334
18BH2A-103 <>	33.1773	34047.5	1.13944	5.34022	0.740556	13.7406	0.936209	0.532187	0.572769	0.611796	2750.66	12.8248	2732	8.86144	2718.22	12.2083	2718.22	12.2083	101.193
18BH2A-104 <>	74.2359	129829	1.10513	5.3302	0.642008	14.1176	0.954177	0.545762	0.705889	0.739788	2807.52	16.0663	2757.64	9.04791	2721.31	10.5806	2721.31	10.5806	103.168
18BH2A-105 <>	147.7	106195	3.16742	7.85376	0.810471	6.49121	2.93629	0.369745	2.82222	0.961152	2028.2	49.1112	2044.71	25.8402	2061.39	14.2956	2061.39	14.2956	98.3901
Sample 14MO4 - Upper Devonian Bushberg Sandstone
							Isotope ratios						Apparent ages (Ma)
Analysis	U	206Pb	U/Th	206Pb*	±	207Pb*	±	206Pb*	±	error	206Pb*	±	207Pb*	±	206Pb*	±	Best age	±	Conc
	(ppm)	204Pb		207Pb*	(%)	235U*	(%)	238U	(%)	corr.	238U*	(Ma)	235U	(Ma)	207Pb*	(Ma)	(Ma)	(Ma)	(%)
14MO4-1 <>	21.7436	9250.03	1.34449	12.5093	8.29096	1.97704	9.46235	0.179369	4.56026	0.481937	1063.53	44.7108	1107.71	63.8899	1195.5	163.824	1195.5	163.824	88.9607
14MO4-2 <>	152.942	151000	7.18099	5.39332	0.114214	13.4505	1.69243	0.526129	1.68857	0.99772	2725.12	37.5269	2711.81	15.9967	2701.89	1.88574	2701.89	1.88574	100.86
14MO4-3 <>	167.612	203588	1.40894	10.7587	0.578975	3.35329	1.89368	0.261654	1.803	0.952115	1498.3	24.1048	1493.56	14.8122	1486.82	10.9665	1486.82	10.9665	100.772
14MO4-4 <>	44.2837	67608.9	0.711504	5.35822	0.460405	13.5168	1.61781	0.525284	1.55091	0.958651	2721.55	34.4313	2716.46	15.2965	2712.67	7.59386	2712.67	7.59386	100.327
14MO4-5 <>	28.9414	110788	1.77455	5.33759	0.987005	13.7585	3.54035	0.532617	3.39998	0.960353	2752.47	76.1722	2733.23	33.5245	2719.03	16.2667	2719.03	16.2667	101.23
14MO4-6 <>	119.387	26301.4	1.08165	10.2946	0.630868	3.46707	2.76946	0.258864	2.69664	0.973709	1484.03	35.747	1519.76	21.8289	1569.86	11.8172	1569.86	11.8172	94.5324
14MO4-7 <>	201.581	127738	2.96147	10.6129	0.528156	3.46461	3.54252	0.266677	3.50292	0.988824	1523.91	47.5419	1519.2	27.9204	1512.62	9.96798	1512.62	9.96798	100.747
14MO4-8 <>	66.2511	90307.8	0.886913	5.3557	0.467277	13.7018	2.01957	0.532221	1.96477	0.972865	2750.8	43.9953	2729.32	19.1138	2713.44	7.70663	2713.44	7.70663	101.377
14MO4-9 <>	190.193	100572	1.41678	13.2523	0.951921	1.87434	1.48523	0.180152	1.14007	0.767603	1067.81	11.2189	1072.06	9.83438	1080.72	19.0792	1080.72	19.0792	98.8048
14MO4-10 <>	96.361	82373.9	1.78708	11.2484	1.13897	2.96611	3.22479	0.241979	3.01696	0.935551	1396.98	37.8928	1398.98	24.4928	1402.02	21.8223	1402.02	21.8223	99.6405
14MO4-11 <>	25.0336	14279.5	1.34845	12.2456	4.23974	2.49601	5.07311	0.22168	2.78587	0.549144	1290.74	32.5875	1270.88	36.7932	1237.43	83.1672	1237.43	83.1672	104.308
14MO4-12 <>	69.0857	24025.9	1.69548	12.8683	1.84293	2.09564	2.66181	0.195586	1.92064	0.721554	1151.57	20.2546	1147.38	18.2987	1139.47	36.6676	1139.47	36.6676	101.062
14MO4-13 <>	59.98	138849	0.548023	5.58875	0.329291	12.3834	1.23572	0.501941	1.19104	0.963841	2622.13	25.6593	2633.92	11.6102	2642.97	5.46386	2642.97	5.46386	99.2117
14MO4-14 <>	194.237	245311	2.31341	13.2792	0.688378	1.86939	1.41328	0.18004	1.2343	0.873359	1067.19	12.1398	1070.31	9.34935	1076.7	13.8009	1076.7	13.8009	99.1172
14MO4-15 <>	42.9903	62524.6	1.26915	5.26291	0.471746	13.978	1.93997	0.533544	1.88174	0.969983	2756.37	42.2043	2748.22	18.385	2742.22	7.75638	2742.22	7.75638	100.516
14MO4-16 <>	64.1901	31784.9	1.34	13.1921	2.62389	1.94796	2.91248	0.186377	1.264	0.433995	1101.72	12.8007	1097.74	19.5436	1089.86	52.5973	1089.86	52.5973	101.088
14MO4-17 <>	67.5095	6997.63	1.35392	13.0969	2.92705	1.87268	4.18305	0.177881	2.98836	0.714397	1055.39	29.0926	1071.48	27.6954	1104.39	58.5101	1104.39	58.5101	95.5634
14MO4-18 <>	184.556	178864	0.9791	8.50331	0.218615	5.72096	1.68912	0.352822	1.67492	0.991589	1948.06	28.1598	1934.54	14.6002	1920.07	3.92045	1920.07	3.92045	101.458
14MO4-19 <>	70.4431	55060.3	1.13606	13.1794	1.86975	1.91425	2.31935	0.182975	1.37238	0.591709	1083.21	13.6839	1086.07	15.4704	1091.79	37.4466	1091.79	37.4466	99.2142
14MO4-20 <>	53.5993	19078.2	1.2878	13.2336	2.55398	1.91989	3.43046	0.18427	2.29026	0.667624	1090.26	22.9725	1088.03	22.9069	1083.56	51.2256	1083.56	51.2256	100.618
14MO4-21 <>	164.306	261387	1.02378	5.35766	0.148406	13.5104	1.14586	0.524981	1.13621	0.991578	2720.27	25.215	2716.02	10.8335	2712.84	2.44773	2712.84	2.44773	100.274
14MO4-23 <>	79.6411	29522.5	2.29285	11.3949	2.07011	2.76409	3.59377	0.228434	2.93766	0.817431	1326.29	35.2155	1345.9	26.8024	1377.19	39.8026	1377.19	39.8026	96.3039
14MO4-24 <>	64.2892	60220.1	2.70173	11.1206	2.01426	2.99974	2.1362	0.241942	0.711413	0.333027	1396.78	8.93407	1407.55	16.269	1423.88	38.4809	1423.88	38.4809	98.0969
14MO4-25 <>	28.9575	14452.7	1.07961	13.5923	5.08785	1.74187	5.57472	0.171714	2.27844	0.408709	1021.55	21.5249	1024.16	35.9752	1029.71	102.913	1029.71	102.913	99.2075
14MO4-27 <>	182.495	117765	1.42286	13.2776	0.634965	1.90137	2.1485	0.183098	2.05253	0.955331	1083.88	20.4772	1081.57	14.2974	1076.94	12.733	1076.94	12.733	100.644
14MO4-28 <>	7.20833	16498.9	0.347977	5.20893	2.35158	14.2944	3.91733	0.540024	3.13298	0.799774	2783.55	70.8237	2769.44	37.1919	2759.17	38.6191	2759.17	38.6191	100.884
14MO4-29 <>	134.65	42906.2	2.65951	9.63617	0.65787	4.2194	1.46899	0.294886	1.31345	0.894115	1665.9	19.2821	1677.8	12.0587	1692.7	12.1296	1692.7	12.1296	98.4164
14MO4-30 <>	61.147	95410.8	1.05264	13.0351	2.02554	1.91096	2.39633	0.18066	1.28047	0.534346	1070.58	12.6306	1084.92	15.9745	1113.8	40.4238	1113.8	40.4238	96.1193
14MO4-31 <>	32.533	45112.9	1.14157	5.60279	0.646603	12.0439	2.40297	0.489405	2.31434	0.963116	2568.1	49.024	2607.83	22.5325	2638.81	10.7363	2638.81	10.7363	97.3204
14MO4-32 <>	63.8183	283595	1.32103	5.41477	0.467904	13.4283	1.60554	0.52735	1.53585	0.956592	2730.28	34.1846	2710.25	15.1736	2695.34	7.72692	2695.34	7.72692	101.296
14MO4-33 <>	149.678	101124	1.84302	11.756	0.875347	2.63942	2.11377	0.225044	1.92401	0.910224	1308.47	22.7847	1311.7	15.5668	1316.96	16.9706	1316.96	16.9706	99.3559
14MO4-34 <>	154.743	47869.1	2.96907	13.4951	1.25414	1.7139	1.68231	0.167749	1.12129	0.66652	999.698	10.3836	1013.75	10.7881	1044.2	25.319	1044.2	25.319	95.7381
14MO4-35 <>	49.1311	40410.2	4.78562	11.523	1.63824	2.74165	3.1382	0.229127	2.67664	0.852925	1329.92	32.1657	1339.83	23.3526	1355.66	31.5922	1355.66	31.5922	98.1014
14MO4-36 <>	28.6556	45458.8	2.66133	5.35495	0.581876	13.6197	1.48614	0.528959	1.36749	0.920163	2737.07	30.4981	2723.63	14.0588	2713.68	9.5965	2713.68	9.5965	100.862
14MO4-37 <>	23.7053	65723.1	2.19833	12.2783	5.35843	2.33351	6.09848	0.2078	2.91181	0.477465	1217.09	32.295	1222.55	43.3734	1232.21	105.199	1232.21	105.199	98.7724
14MO4-38 <>	149.506	21723.6	1.91493	11.6283	1.27944	2.78394	2.1521	0.234786	1.73048	0.804089	1359.54	21.2114	1351.24	16.0785	1338.1	24.732	1338.1	24.732	101.602
14MO4-39 <>	44.0349	89923.1	1.61759	13.342	4.08394	1.81861	4.9735	0.175978	2.83852	0.570728	1044.97	27.3825	1052.18	32.5946	1067.21	82.1477	1067.21	82.1477	97.9159
14MO4-40 <>	49.6234	87565.4	0.564705	5.45258	0.383533	13.1865	1.66285	0.521472	1.61801	0.973037	2705.42	35.7497	2693.09	15.6954	2683.84	6.33962	2683.84	6.33962	100.804
14MO4-41 <>	78.4716	31321.2	1.31299	11.8526	2.07219	2.51395	2.37103	0.216108	1.1523	0.485993	1261.28	13.2003	1276.07	17.2254	1301.06	40.2588	1301.06	40.2588	96.9419
14MO4-42 <>	117.36	75928.7	1.10429	9.93284	0.428066	4.00943	1.69359	0.288838	1.63859	0.96753	1635.72	23.6727	1636.11	13.7644	1636.59	7.95034	1636.59	7.95034	99.9468
14MO4-43 <>	243.277	208998	1.69339	8.93123	0.290283	5.13712	1.37275	0.332759	1.34171	0.977387	1851.74	21.5951	1842.27	11.668	1831.57	5.26139	1831.57	5.26139	101.101
14MO4-44 <>	54.2162	98207.4	1.51504	5.42767	0.572579	13.1769	0.947352	0.518712	0.754738	0.796681	2693.72	16.6175	2692.41	8.94097	2691.41	9.45964	2691.41	9.45964	100.086
14MO4-45 <>	30.553	40467.6	1.03668	5.44638	0.83772	13.2486	1.67948	0.523331	1.45563	0.866718	2713.29	32.2371	2697.53	15.8576	2685.73	13.849	2685.73	13.849	101.026
14MO4-47 <>	38.1694	3970.65	1.89823	11.0511	3.78119	2.94845	4.55545	0.236319	2.54061	0.557708	1367.53	31.306	1394.45	34.5538	1435.85	72.139	1435.85	72.139	95.2421
14MO4-48 <>	111.178	34025.7	1.92017	13.4047	1.47202	1.7742	3.74566	0.172488	3.44429	0.919541	1025.81	32.6643	1036.06	24.328	1057.78	29.6355	1057.78	29.6355	96.9777
14MO4-49 <>	49.1888	26644.1	1.4532	12.7045	1.96882	2.15514	2.48751	0.198579	1.52036	0.611195	1167.68	16.2379	1166.71	17.2542	1164.88	38.9985	1164.88	38.9985	100.24
14MO4-51 <>	55.2602	79110.8	1.41845	5.38457	0.351206	13.4859	2.33118	0.52666	2.30458	0.988586	2727.36	51.2515	2714.3	22.0399	2704.57	5.79717	2704.57	5.79717	100.843
14MO4-53 <>	257.27	221910	2.45937	10.9562	0.457626	3.21035	1.68584	0.2551	1.62254	0.962452	1464.72	21.2592	1459.66	13.0528	1452.28	8.70826	1452.28	8.70826	100.857
14MO4-54 <>	63.6698	32029.7	2.00155	10.9461	1.23947	3.19792	2.59502	0.253879	2.27988	0.878559	1458.45	29.7581	1456.66	20.0753	1454.03	23.5813	1454.03	23.5813	100.304
14MO4-55 <>	68.1619	67930.4	0.717509	13.2811	2.10692	1.91351	4.28139	0.184316	3.72709	0.870533	1090.51	37.3929	1085.81	28.559	1076.4	42.321	1076.4	42.321	101.311
14MO4-56 <>	214.547	99511.2	1.09483	12.7192	0.738763	2.16941	1.60015	0.200125	1.41941	0.887045	1175.99	15.2581	1171.29	11.1217	1162.6	14.6611	1162.6	14.6611	101.152
14MO4-57 <>	46.4729	24753	1.01653	13.4368	3.63494	1.87578	4.08249	0.182799	1.85848	0.455232	1082.25	18.5157	1072.57	27.0448	1052.97	73.2535	1052.97	73.2535	102.781
14MO4-58 <>	115.466	33388.5	3.7353	12.5344	1.34619	2.22757	2.63005	0.202504	2.25941	0.859074	1188.76	24.528	1189.75	18.4331	1191.55	26.583	1191.55	26.583	99.7652
14MO4-59 <>	363.064	11993.4	8.4713	10.9133	0.752813	3.05659	1.68428	0.241932	1.50668	0.894552	1396.73	18.9206	1421.88	12.8868	1459.73	14.3112	1459.73	14.3112	95.6842
14MO4-61 <>	51.4291	48310.9	1.51854	11.7528	1.77653	2.68771	2.43607	0.229098	1.66685	0.684237	1329.77	20.0286	1325.08	18.0298	1317.49	34.4425	1317.49	34.4425	100.932
14MO4-62 <>	67.6208	30601.9	1.44749	12.7973	1.90962	2.07902	2.81899	0.192965	2.07366	0.735602	1137.41	21.6225	1141.91	19.3296	1150.49	37.94	1150.49	37.94	98.8638
14MO4-63 <>	150.502	72396.5	1.76887	13.6207	0.543208	1.74886	1.47855	0.172764	1.37515	0.930066	1027.32	13.059	1026.74	9.55173	1025.49	10.9883	1025.49	10.9883	100.178
14MO4-64 <>	238.115	139552	3.83002	13.3228	0.450148	1.90278	2.71083	0.183857	2.6732	0.986116	1088.01	26.7629	1082.06	18.0448	1070.12	9.03421	1070.12	9.03421	101.672
14MO4-66 <>	105.129	85518.2	1.24762	13.285	1.83851	1.91902	2.74547	0.184901	2.03899	0.742675	1093.69	20.5113	1087.73	18.3289	1075.82	36.915	1075.82	36.915	101.661
14MO4-67 <>	138.208	57283.7	1.41199	12.2358	0.591795	2.41271	1.81362	0.21411	1.71436	0.945264	1250.68	19.4894	1246.39	13.0199	1238.99	11.6134	1238.99	11.6134	100.943
14MO4-69 <>	133.372	50899.4	1.82677	13.6249	1.47808	1.73658	2.06946	0.171604	1.44843	0.699907	1020.94	13.6761	1022.2	13.3352	1024.86	29.9191	1024.86	29.9191	99.618
14MO4-70 <>	79.1496	36620.1	2.0301	11.431	1.73692	2.85456	2.43792	0.236659	1.71072	0.701713	1369.31	21.1043	1370.01	18.3341	1371.1	33.4235	1371.1	33.4235	99.869
14MO4-71 <>	138.365	11309	1.25331	10.7071	1.08135	3.18761	2.89895	0.247534	2.68972	0.927825	1425.75	34.4042	1454.16	22.4099	1495.92	20.4577	1495.92	20.4577	95.3092
14MO4-72 <>	22.9515	14634.1	1.0192	13.1379	6.44202	1.88361	6.81055	0.179481	2.20996	0.32449	1064.14	21.6786	1075.34	45.2016	1098.09	129.055	1098.09	129.055	96.9081
14MO4-73 <>	67.839	59203.3	1.14369	11.6291	1.48497	2.71881	2.3162	0.229309	1.77754	0.767438	1330.88	21.3747	1333.61	17.1958	1337.97	28.7063	1337.97	28.7063	99.4696
14MO4-74 <>	118.626	87862.2	1.10608	13.3417	1.57571	1.86007	2.46558	0.179987	1.89637	0.769139	1066.9	18.6469	1067.01	16.2832	1067.25	31.681	1067.25	31.681	99.9669
14MO4-75 <>	24.3419	18922	1.12712	5.67915	0.809038	12.1727	1.36769	0.501382	1.10274	0.806279	2619.73	23.7395	2617.81	12.8337	2616.3	13.4666	2616.3	13.4666	100.131
14MO4-76 <>	61.7034	51659.9	1.43445	12.5566	1.21169	2.19004	2.25501	0.199445	1.90181	0.843371	1172.34	20.3859	1177.88	15.7206	1188.09	23.9381	1188.09	23.9381	98.6736
14MO4-77 <>	81.5236	51542.5	0.931222	12.3629	1.221	2.37278	1.70405	0.212753	1.18868	0.697561	1243.47	13.4427	1234.44	12.1731	1218.69	23.9958	1218.69	23.9958	102.033
14MO4-78 <>	67.423	34580.3	1.01939	13.2314	2.80668	1.85637	3.60895	0.178143	2.26871	0.628634	1056.82	22.1141	1065.7	23.82	1083.89	56.3015	1083.89	56.3015	97.5025
14MO4-79 <>	131.71	66399.5	1.31212	13.445	1.12148	1.81611	1.96114	0.177093	1.60884	0.820358	1051.07	15.6035	1051.28	12.8427	1051.74	22.6171	1051.74	22.6171	99.9372
14MO4-80 <>	164.666	95479.8	0.730297	12.592	0.576062	2.22665	1.93811	0.203351	1.85052	0.954806	1193.3	20.1589	1189.47	13.5811	1182.53	11.3732	1182.53	11.3732	100.911
14MO4-81 <>	188.861	176519	1.31571	9.45105	0.310969	4.49864	1.8885	0.308361	1.86272	0.98635	1732.64	28.301	1730.72	15.6895	1728.39	5.70859	1728.39	5.70859	100.246
14MO4-82 <>	102.822	170734	0.608987	5.42194	0.324415	13.3762	1.10646	0.526001	1.05783	0.956051	2724.58	23.5055	2706.58	10.4537	2693.15	5.35743	2693.15	5.35743	101.167
14MO4-83 <>	82.8656	60827.7	4.16948	11.987	3.52803	2.38091	4.8375	0.20699	3.30974	0.684185	1212.76	36.5901	1236.88	34.6041	1279.14	68.787	1279.14	68.787	94.8112
14MO4-84 <>	73.8746	7182.01	2.86886	12.1463	1.86915	2.07036	2.75315	0.182384	2.02141	0.734217	1079.99	20.1003	1139.05	18.8524	1253.36	36.5681	1253.36	36.5681	86.1677
14MO4-85 <>	54.6705	1870.11	2.41633	11.8502	4.91955	2.2242	6.24592	0.19116	3.84831	0.616132	1127.66	39.8127	1188.69	43.7771	1301.47	95.6229	1301.47	95.6229	86.6448
14MO4-86 <>	86.8223	30871.2	1.3839	13.3255	1.32206	1.8411	1.95393	0.177934	1.43875	0.736338	1055.68	14.0101	1060.25	12.8574	1069.71	26.5741	1069.71	26.5741	98.688
14MO4-87 <>	174.119	314245	1.35343	13.6091	1.15641	1.72659	1.94533	0.170419	1.5643	0.804128	1014.42	14.683	1018.48	12.5088	1027.21	23.408	1027.21	23.408	98.7545
14MO4-88 <>	27.3882	36697.8	1.96735	5.2704	0.453736	13.7808	1.66776	0.526764	1.60485	0.96228	2727.8	35.6946	2734.76	15.7898	2739.89	7.4617	2739.89	7.4617	99.559
14MO4-89 <>	86.9614	42950.8	0.906335	13.5043	1.04117	1.79043	2.03865	0.175359	1.75273	0.859749	1041.57	16.8574	1041.98	13.2826	1042.82	21.0273	1042.82	21.0273	99.88
14MO4-90 <>	31.1898	34386.1	1.17429	13.0858	4.22946	1.90423	4.97376	0.180725	2.61725	0.526212	1070.93	25.8247	1082.57	33.1251	1106.05	84.5739	1106.05	84.5739	96.8246
14MO4-91 <>	52.2177	38544.8	2.38016	11.1941	1.76786	2.88141	2.32123	0.233934	1.50426	0.648042	1355.08	18.3841	1377.06	17.4987	1411.29	33.8305	1411.29	33.8305	96.0174
14MO4-92 <>	66.8908	18871.3	1.77143	9.05318	2.37435	4.80917	4.46293	0.315769	3.77892	0.846734	1769.03	58.4638	1786.5	37.5322	1806.95	43.1671	1806.95	43.1671	97.9016
14MO4-93 <>	63.8023	180665	1.47886	5.29966	0.336436	13.6571	2.30101	0.524933	2.27628	0.989253	2720.07	50.5134	2726.22	21.7734	2730.78	5.53626	2730.78	5.53626	99.6079
14MO4-94 <>	118.913	116195	1.87922	11.4813	0.909777	2.81737	1.6377	0.234602	1.36175	0.831502	1358.57	16.681	1360.17	12.2734	1362.66	17.5261	1362.66	17.5261	99.7004
14MO4-95 <>	77.2382	107110	1.96826	11.0612	1.02783	3.00398	2.10895	0.24099	1.84153	0.873198	1391.84	23.0531	1408.63	16.0671	1434.1	19.6073	1434.1	19.6073	97.0532
14MO4-96 <>	88.0879	32677.7	1.95977	12.0576	1.29065	2.53544	2.63765	0.221724	2.30031	0.872105	1290.98	26.912	1282.26	19.2092	1267.71	25.1872	1267.71	25.1872	101.836
14MO4-97 <>	147.834	129461	1.29975	12.5519	1.04262	2.24754	1.8214	0.204604	1.49346	0.819954	1200.01	16.3525	1196.02	12.8	1188.84	20.6007	1188.84	20.6007	100.94
14MO4-98 <>	66.0937	76617.9	0.555907	5.82572	0.403416	10.3317	1.99498	0.436534	1.95377	0.979341	2335.11	38.2735	2464.94	18.4711	2573.81	6.74246	2573.81	6.74246	90.7258
14MO4-99 <>	93.846	312870	1.02632	5.63229	0.371561	12.2228	1.30219	0.499293	1.24805	0.958427	2610.76	26.793	2621.66	12.2228	2630.09	6.17633	2630.09	6.17633	99.2651
14MO4-101 <>	155.771	97165.5	3.57676	13.4646	0.55186	1.77526	1.52465	0.173362	1.42127	0.932194	1030.61	13.5369	1036.45	9.90314	1048.8	11.1447	1048.8	11.1447	98.2655
14MO4-102 <>	147.271	101691	5.80496	5.54642	0.173454	12.7476	1.5526	0.512789	1.54288	0.99374	2668.53	33.7143	2661.18	14.6191	2655.58	2.87635	2655.58	2.87635	100.487
14MO4-103 <>	74.8737	33021.7	1.33359	13.7688	1.14762	1.71872	2.02405	0.171632	1.66726	0.823723	1021.1	15.7445	1015.55	12.9932	1003.58	23.2942	1003.58	23.2942	101.746
14MO4-104 <>	69.4013	38904.6	2.69818	11.5214	1.95675	2.6944	2.24355	0.225148	1.09755	0.489205	1309.02	13.0024	1326.92	16.6158	1355.93	37.733	1355.93	37.733	96.5405
Sample 14MO3 - Mississippian Aux Vases Sandstone
							Isotope ratios						Apparent ages (Ma)
Analysis	U	206Pb	U/Th	206Pb*	±	207Pb*	±	206Pb*	±	error	206Pb*	±	207Pb*	±	206Pb*	±	Best age	±	Conc
	(ppm)	204Pb		207Pb*	(%)	235U*	(%)	238U	(%)	corr.	238U*	(Ma)	235U	(Ma)	207Pb*	(Ma)	(Ma)	(Ma)	(%)
14MO3-1 <>	114.921	154686	0.533419	10.8908	0.558136	3.20729	0.830278	0.253337	0.614691	0.740344	1455.66	8.0095	1458.92	6.4268	1463.66	10.6047	1463.66	10.6047	99.4535
14MO3-2 <>	97.458	37111.3	2.31504	13.2288	1.03124	1.90027	1.40138	0.18232	0.948896	0.677116	1079.63	9.4327	1081.18	9.32341	1084.33	20.6599	1084.33	20.6599	99.5674
14MO3-3 <>	71.7401	14314.1	0.661474	18.5016	8.13704	0.517249	8.30288	0.0694078	1.65122	0.198873	432.587	6.90856	423.312	28.7486	373.08	183.427	432.587	6.90856	115.95
14MO3-4 <>	32.2191	47688.9	1.83402	5.2611	1.00901	13.822	1.41229	0.527406	0.988163	0.699688	2730.51	21.9958	2737.58	13.3735	2742.79	16.5931	2742.79	16.5931	99.5523
14MO3-5 <>	133.925	12182.9	2.93352	17.9176	4.29928	0.576415	4.35094	0.0749055	0.668544	0.153655	465.643	3.00325	462.155	16.1553	444.839	95.6304	465.643	3.00325	104.677
14MO3-6 <>	67.2352	15347.9	1.11117	10.0062	1.39154	3.95207	2.54144	0.286808	2.12662	0.836778	1625.56	30.5554	1624.42	20.5971	1622.92	25.8897	1622.92	25.8897	100.163
14MO3-7 <>	105.46	13318.2	2.2874	12.4752	1.3617	2.21614	1.80341	0.200514	1.1824	0.655646	1178.08	12.7309	1186.15	12.6185	1200.89	26.8229	1200.89	26.8229	98.1011
14MO3-8 <>	263.181	150509	1.49892	12.5692	0.654385	2.24439	1.30784	0.204599	1.13236	0.86582	1199.98	12.3983	1195.03	9.18676	1186.12	12.9257	1186.12	12.9257	101.169
14MO3-10 <>	264.154	24723.9	1.52873	10.0174	0.663386	3.22195	3.50488	0.234085	3.44153	0.981924	1355.87	42.0827	1462.45	27.1652	1620.82	12.3443	1620.82	12.3443	83.6534
14MO3-11 <>	92.0551	21980.8	0.810911	18.0125	2.50022	0.524999	2.94117	0.0685852	1.54899	0.526659	427.627	6.40899	428.485	10.2814	433.084	55.7122	427.627	6.40899	98.7399
14MO3-12 <>	112.943	29677.4	0.705421	13.2106	0.831631	1.91239	1.42566	0.18323	1.15797	0.812235	1084.6	11.5596	1085.42	9.50572	1087.06	16.6507	1087.06	16.6507	99.7731
14MO3-13 <>	124.043	189936	1.52771	11.6226	0.575026	2.72219	1.39583	0.229467	1.27188	0.911201	1331.71	15.3027	1334.53	10.3656	1339.04	11.1147	1339.04	11.1147	99.4523
14MO3-14 <>	224.73	73892.7	1.87886	13.6504	0.804263	1.73483	1.52287	0.171751	1.29317	0.849168	1021.75	12.2191	1021.54	9.80917	1021.08	16.2812	1021.08	16.2812	100.065
14MO3-15 <>	192.834	16388.4	0.611066	17.8162	2.86187	0.578802	2.96338	0.0747901	0.768972	0.259491	464.95	3.44944	463.691	11.0316	457.484	63.4971	464.95	3.44944	101.632
14MO3-16 <>	137.092	85352.4	2.61106	14.0127	1.08173	1.57713	1.73509	0.160283	1.35661	0.781866	958.351	12.0809	961.239	10.782	967.856	22.0679	967.856	22.0679	99.0179
14MO3-17 <>	16.9968	12703.5	1.12356	13.6616	7.08214	1.79847	7.55031	0.178199	2.61733	0.346651	1057.13	25.519	1044.9	49.3081	1019.41	143.574	1019.41	143.574	103.7
14MO3-18 <>	119.425	87292.5	1.6901	10.6429	0.852865	3.40165	1.90124	0.262571	1.69921	0.893741	1502.98	22.7803	1504.78	14.9201	1507.29	16.1088	1507.29	16.1088	99.7143
14MO3-19 <>	156.173	168224	1.90954	11.2813	0.707894	2.92216	1.51853	0.23909	1.34343	0.884695	1381.97	16.7107	1387.67	11.4881	1396.42	13.5731	1396.42	13.5731	98.9647
14MO3-20 <>	21.7542	37016.1	0.878566	5.72979	1.1246	12.2117	2.52359	0.507475	2.25916	0.895216	2645.84	49.0273	2620.81	23.6889	2601.52	18.743	2601.52	18.743	101.704
14MO3-21 <>	401.9	12870.9	0.839765	17.901	1.56882	0.5449	3.7945	0.0707443	3.455	0.910529	440.638	14.7154	441.65	13.5902	446.905	34.8879	440.638	14.7154	98.5979
14MO3-22 <>	109.376	77848.9	2.94556	13.1519	1.6068	1.88401	2.17399	0.179709	1.46439	0.673595	1065.39	14.3804	1075.47	14.4213	1095.98	32.165	1095.98	32.165	97.2089
14MO3-23 <>	24.3575	21317.5	0.550965	11.1457	2.93624	3.09399	3.21558	0.250105	1.3109	0.407671	1439.02	16.9069	1431.2	24.6801	1419.58	56.1347	1419.58	56.1347	101.369
14MO3-24 <>	198.405	15591.3	1.7917	13.7968	0.925575	1.65127	3.15074	0.165232	3.01172	0.955878	985.787	27.5307	990.037	19.9279	999.45	18.7986	999.45	18.7986	98.633
14MO3-25 <>	291.925	13172	2.59675	9.44627	0.468183	3.70749	2.59128	0.254003	2.54864	0.983543	1459.09	33.279	1572.99	20.725	1729.32	8.59365	1729.32	8.59365	84.3735
14MO3-26 <>	126.52	25999.4	1.08142	18.3018	6.47435	0.475002	6.76256	0.0630505	1.95321	0.288828	394.151	7.46798	394.638	22.1163	397.472	145.264	394.151	7.46798	NA
14MO3-27 <>	121.445	256402	1.40685	9.65889	0.523015	4.27083	1.316	0.299184	1.2076	0.917633	1687.26	17.9272	1687.76	10.8277	1688.36	9.64982	1688.36	9.64982	99.9351
14MO3-28 <>	78.5811	67415.6	1.05183	9.27742	0.80262	4.59234	1.43038	0.309001	1.18397	0.827732	1735.79	18.0169	1747.88	11.9273	1762.35	14.672	1762.35	14.672	98.4928
14MO3-29 <>	58.9158	24280.1	0.474922	13.4593	2.43579	1.71271	3.25667	0.167188	2.16166	0.663766	996.597	19.9605	1013.3	20.8807	1049.6	49.1189	1049.6	49.1189	94.9501
14MO3-30 <>	164.751	162790	0.980601	9.49385	0.317549	4.40313	0.774896	0.303181	0.706842	0.912177	1707.06	10.6008	1712.93	6.41202	1720.09	5.83548	1720.09	5.83548	99.2428
14MO3-32 <>	105.895	10804.2	1.62128	13.2428	2.19924	1.84072	2.78466	0.176794	1.70811	0.613401	1049.43	16.5425	1060.12	18.3235	1082.17	44.1177	1082.17	44.1177	96.9747
14MO3-34 <>	43.8871	35694.6	0.536635	9.87335	0.842924	4.11396	1.72842	0.294593	1.50894	0.873019	1664.44	22.1351	1657.08	14.1192	1647.74	15.6315	1647.74	15.6315	101.014
14MO3-35 <>	47.9342	32923.3	1.46895	10.0955	1.1855	3.94712	3.23752	0.289007	3.01266	0.930546	1636.56	43.544	1623.4	26.2342	1606.36	22.103	1606.36	22.103	101.88
14MO3-36 <>	74.5553	23282.8	1.56511	13.7251	3.62475	1.75758	4.53569	0.174956	2.72648	0.601116	1039.36	26.1716	1029.96	29.3617	1010.02	73.5289	1010.02	73.5289	102.905
14MO3-37 <>	64.041	24188.1	1.22985	18.4947	7.6319	0.559745	7.67977	0.075082	0.856111	0.111476	466.7	3.85427	451.361	27.9914	373.931	172.001	466.7	3.85427	124.809
14MO3-38 <>	147.498	82651.3	0.697216	13.7273	1.09249	1.71994	1.78796	0.171237	1.41537	0.79161	1018.92	13.3395	1016	11.4805	1009.7	22.1357	1009.7	22.1357	100.914
14MO3-39 <>	94.2105	32136.8	0.57061	18.6956	4.57101	0.52844	5.50605	0.0716528	3.0696	0.557495	446.106	13.2306	430.774	19.3317	349.559	103.384	446.106	13.2306	127.62
14MO3-40 <>	375.026	32823.4	2.70934	13.3059	0.567037	1.81202	2.20875	0.174867	2.13472	0.966485	1038.87	20.4824	1049.81	14.4527	1072.65	11.3718	1072.65	11.3718	96.8508
14MO3-41 <>	255.86	110152	0.985835	10.9757	0.450352	3.07021	1.21063	0.244399	1.12374	0.928233	1409.52	14.2274	1425.29	9.27265	1448.89	8.57375	1448.89	8.57375	97.2827
14MO3-42 <>	279.939	41224.1	0.951731	13.5137	0.484023	1.72482	2.63685	0.16905	2.59205	0.983008	1006.88	24.1627	1017.82	16.9497	1041.42	9.78733	1041.42	9.78733	96.6826
14MO3-43 <>	150.603	36168.1	0.648512	10.4269	0.564199	3.39067	1.57486	0.256413	1.47032	0.933624	1471.47	19.3437	1502.24	12.3494	1545.91	10.6031	1545.91	10.6031	95.1846
14MO3-44 <>	42.1277	19647.7	0.789472	5.46358	0.828022	12.101	1.71137	0.47951	1.49772	0.875159	2525.13	31.292	2612.26	16.0519	2680.51	13.6953	2680.51	13.6953	94.2034
14MO3-45 <>	32.204	14133.7	1.09151	13.5511	2.87257	1.74039	3.18252	0.171049	1.36996	0.430462	1017.89	12.8994	1023.61	20.5256	1035.84	58.0423	1035.84	58.0423	98.2671
14MO3-46 <>	72.1264	23442.1	1.87953	14.1066	2.82002	1.55366	3.22194	0.158956	1.55834	0.483665	950.972	13.7781	951.948	19.9065	954.225	57.6856	954.225	57.6856	99.6591
14MO3-47 <>	113.537	27864.4	1.61472	13.3532	1.47072	1.84697	2.54259	0.178873	2.07407	0.815731	1060.81	20.2871	1062.35	16.7503	1065.53	29.5946	1065.53	29.5946	99.5574
14MO3-48 <>	178.697	56727.3	1.10051	18.0991	3.91058	0.526153	4.06229	0.0690665	1.09981	0.270736	430.529	4.58034	429.253	14.2214	422.388	87.2971	430.529	4.58034	101.928
14MO3-49 <>	175.586	36996.8	1.04683	17.3199	4.12619	0.601854	4.29604	0.0756021	1.19605	0.278408	469.819	5.41939	478.41	16.3909	519.784	90.5908	469.819	5.41939	90.3874
14MO3-50 <>	222.099	120664	2.98741	9.20445	0.237068	4.53768	0.606318	0.302922	0.558051	0.920393	1705.78	8.36381	1737.91	5.04475	1776.77	4.32398	1776.77	4.32398	96.0044
14MO3-51 <>	200.275	8736.73	0.950986	13.4188	1.53852	1.82412	2.46131	0.177528	1.9212	0.78056	1053.46	18.6719	1054.17	16.1437	1055.66	31.0031	1055.66	31.0031	99.7915
14MO3-52 <>	44.9242	21212.2	1.56013	13.3194	3.75567	1.89494	4.10239	0.183054	1.65062	0.402356	1083.64	16.4642	1079.32	27.2726	1070.62	75.4873	1070.62	75.4873	101.215
14MO3-53 <>	174.623	101801	2.69775	10.7321	0.50409	3.32834	1.2825	0.259067	1.17928	0.919516	1485.06	15.6422	1487.72	10.014	1491.5	9.54208	1491.5	9.54208	99.5688
14MO3-54 <>	96.5022	56141.1	1.80876	12.5789	1.64756	2.16852	1.9985	0.197836	1.13117	0.566011	1163.68	12.0436	1171.01	13.8889	1184.59	32.5586	1184.59	32.5586	98.2354
14MO3-55 <>	51.0273	39466.9	0.493451	13.1707	1.97121	1.96426	3.63442	0.187631	3.05341	0.840137	1108.53	31.0978	1103.34	24.4586	1093.11	39.4724	1093.11	39.4724	101.411
14MO3-56 <>	138.268	67821.5	1.2118	11.5595	1.21862	2.7187	4.92558	0.227928	4.77246	0.968912	1323.63	57.1079	1333.58	36.5802	1349.57	23.5201	1349.57	23.5201	98.0782
14MO3-58 <>	169.66	74326.2	1.21944	9.32524	0.36148	4.48831	6.62635	0.303558	6.61649	0.998511	1708.93	99.3325	1728.81	55.0775	1752.95	6.61556	1752.95	6.61556	97.4888
14MO3-59 <>	41.8386	16665.5	1.3045	13.6867	3.79144	1.74897	7.64762	0.173612	6.64161	0.868455	1031.98	63.3376	1026.78	49.4438	1015.69	76.859	1015.69	76.859	101.604
14MO3-60 <>	129.389	156302	1.21908	9.63259	0.635562	4.31034	1.94878	0.301129	1.84223	0.945324	1696.91	27.4851	1695.34	16.0627	1693.39	11.7172	1693.39	11.7172	100.208
14MO3-62 <>	206.311	82983.1	1.43818	11.7373	0.793101	2.75414	7.35001	0.234452	7.3071	0.994161	1357.79	89.4686	1343.21	54.8043	1320.04	15.3691	1320.04	15.3691	102.86
14MO3-63 <>	263.673	15572.2	1.8269	17.9967	2.12213	0.497595	2.47526	0.0649482	1.27415	0.514756	405.648	5.00933	410.073	8.35108	435.039	47.2851	405.648	5.00933	93.2441
14MO3-64 <>	179.621	123609	1.24523	10.6548	0.506883	3.51428	3.13936	0.271568	3.09817	0.986879	1548.76	42.6549	1530.43	24.8202	1505.18	9.57745	1505.18	9.57745	102.895
14MO3-65 <>	177.583	94269.2	1.05414	13.7598	0.902294	1.68942	1.35783	0.168597	1.01468	0.747278	1004.38	9.43695	1004.55	8.66095	1004.9	18.2921	1004.9	18.2921	99.9482
14MO3-66 <>	244.603	111015	2.62322	11.3319	0.274571	2.97814	1.64083	0.244763	1.6177	0.9859	1411.41	20.5058	1402.06	12.4733	1387.84	5.27072	1387.84	5.27072	101.698
14MO3-67 <>	170.418	47268.4	0.981188	17.8574	4.55451	0.53842	4.83374	0.0697329	1.61907	0.334953	434.546	6.80373	437.383	17.1791	452.32	101.169	434.546	6.80373	96.0706
14MO3-68 <>	103.413	106237	1.67001	11.6379	0.979087	2.79617	3.13163	0.236014	2.97464	0.94987	1365.94	36.616	1354.51	23.4259	1336.51	18.9309	1336.51	18.9309	102.202
14MO3-69 <>	162.457	355307	2.59518	12.8709	0.877085	2.11354	2.1105	0.197296	1.91961	0.909556	1160.78	20.3916	1153.23	14.5479	1139.09	17.4317	1139.09	17.4317	101.905
14MO3-70 <>	96.1155	73067.1	1.7175	12.5108	1.66405	2.25093	2.29448	0.204242	1.57974	0.688498	1198.07	17.2718	1197.08	16.1326	1195.28	32.8285	1195.28	32.8285	100.233
14MO3-71 <>	45.1432	21210.8	1.67053	13.7329	3.25599	1.79162	3.46721	0.178446	1.19168	0.3437	1058.48	11.6326	1042.42	22.5981	1008.87	66.068	1008.87	66.068	104.917
14MO3-72 <>	223.244	111960	2.84239	13.3278	0.802606	1.86292	1.77145	0.180075	1.57919	0.89147	1067.38	15.5345	1068.02	11.7047	1069.35	16.1257	1069.35	16.1257	99.8164
14MO3-73 <>	70.6967	5033.48	0.886021	13.4169	4.45686	1.80697	4.97841	0.175835	2.21832	0.445589	1044.18	21.3847	1047.98	32.5524	1055.94	89.7773	1055.94	89.7773	98.8859
14MO3-74 <>	52.039	16154.8	2.89119	15.4682	6.02741	0.812151	6.82855	0.0911121	3.20926	0.469977	562.111	17.2755	603.66	31.084	762.903	127.144	562.111	17.2755	73.6806
14MO3-75 <>	117.284	60162.4	3.26281	13.5821	1.48444	1.79071	2.23172	0.176397	1.66643	0.746704	1047.26	16.1081	1042.09	14.5415	1031.22	30.0248	1031.22	30.0248	101.555
14MO3-76 <>	205.011	101796	2.70699	13.637	0.579077	1.78832	1.93912	0.176874	1.85064	0.954369	1049.87	17.9298	1041.21	12.6287	1023.06	11.7192	1023.06	11.7192	102.621
14MO3-77 <>	234.064	5952.95	1.86766	17.3604	2.84298	0.631765	3.93606	0.0795453	2.72214	0.691591	493.408	12.9301	497.195	15.4747	514.646	62.471	493.408	12.9301	95.8733
14MO3-78 <>	95.3564	57907.5	1.06062	9.85222	0.68791	4.06423	1.60597	0.290409	1.45118	0.903615	1643.57	21.0534	1647.16	13.0875	1651.71	12.7499	1651.71	12.7499	99.5074
14MO3-79 <>	114.938	167056	19.2518	5.68662	0.221837	11.4689	2.39364	0.473013	2.38334	0.995696	2496.76	49.3378	2562.05	22.359	2614.11	3.69324	2614.11	3.69324	95.5109
14MO3-81 <>	18.8166	9233.16	1.37881	13.4006	6.97777	1.83901	7.85179	0.178733	3.60019	0.458518	1060.05	35.1915	1059.51	51.688	1058.4	140.622	1058.4	140.622	100.156
14MO3-83 <>	350.147	140404	2.4973	5.51067	0.256648	11.0527	1.53361	0.441744	1.51198	0.985898	2358.44	29.8642	2527.58	14.281	2666.3	4.25156	2666.3	4.25156	88.4537
14MO3-84 <>	138.912	40653	1.56907	17.811	3.41173	0.582621	3.57497	0.0752615	1.06794	0.298726	467.777	4.81862	466.144	13.364	458.11	75.7027	467.777	4.81862	102.11
14MO3-85 <>	436.08	621037	2.24411	9.86524	0.159247	4.12277	1.58566	0.294982	1.57764	0.994944	1666.38	23.1664	1658.83	12.9583	1649.26	2.95282	1649.26	2.95282	101.038
14MO3-86 <>	111.291	20810.3	1.39135	18.15	5.3931	0.574698	5.68401	0.0756508	1.79511	0.315818	470.111	8.13866	461.048	21.0663	416.123	120.568	470.111	8.13866	112.974
14MO3-87 <>	414.462	49333.9	2.56821	8.6536	0.156675	5.4996	2.01641	0.345165	2.01032	0.996977	1911.47	33.2536	1900.53	17.3259	1888.6	2.81828	1888.6	2.81828	101.211
14MO3-88 <>	31.5017	34423.2	1.14528	13.3073	5.03734	1.69195	5.48103	0.163296	2.1603	0.394142	975.069	19.5488	1005.5	34.9933	1072.45	101.248	1072.45	101.248	90.9197
14MO3-89 <>	149.563	36948.7	1.10669	17.2421	2.74088	0.672281	3.86374	0.0840698	2.72324	0.70482	520.369	13.614	522.098	15.773	529.69	60.0801	520.369	13.614	98.2404
14MO3-90 <>	102.253	24209.7	0.95042	13.231	1.35281	1.88688	2.14921	0.181065	1.67003	0.777044	1072.79	16.5046	1076.48	14.2644	1083.95	27.1105	1083.95	27.1105	98.9705
14MO3-91 <>	276.607	108102	1.93491	13.9629	0.410108	1.6459	2.28441	0.166678	2.2473	0.983753	993.78	20.697	987.98	14.4299	975.113	8.37325	975.113	8.37325	101.914
14MO3-92 <>	75.9235	69667.2	2.24833	11.9366	0.941929	2.42493	2.69185	0.209933	2.52168	0.93678	1228.46	28.2052	1250.02	19.3545	1287.33	18.3207	1287.33	18.3207	95.4268
14MO3-93 <>	114.772	252893	1.99123	8.55673	0.426488	5.6333	1.51872	0.349598	1.45761	0.95976	1932.68	24.3403	1921.21	13.0968	1908.84	7.65855	1908.84	7.65855	101.249
14MO3-94 <>	100.947	170901	1.96227	10.2056	0.639306	3.80975	1.94688	0.28199	1.83892	0.944548	1601.38	26.0755	1594.81	15.6595	1586.12	11.9515	1586.12	11.9515	100.962
14MO3-95 <>	172.823	57861.1	0.926803	17.6657	2.5047	0.591797	3.27739	0.0758232	2.1137	0.644934	471.144	9.60336	472.015	12.3727	476.251	55.4114	471.144	9.60336	98.9277
14MO3-97 <>	117.949	28421.5	0.594395	17.4063	3.58527	0.559576	3.72389	0.0706422	1.0066	0.270309	440.024	4.2815	451.25	13.5677	508.868	78.874	440.024	4.2815	86.4711
14MO3-98 <>	150.242	58081.2	1.19279	17.9784	3.56112	0.522198	4.01858	0.0680902	1.8621	0.463372	424.639	7.6524	426.618	13.9989	437.302	79.2947	424.639	7.6524	97.1043
14MO3-99 <>	75.8491	67456.5	1.63432	10.9512	1.46058	3.32975	3.65729	0.264467	3.35298	0.916794	1512.66	45.2086	1488.05	28.5662	1453.15	27.7917	1453.15	27.7917	104.095
14MO3-100 <>	262.063	38339.3	1.55194	18.215	2.3482	0.515198	2.58375	0.0680615	1.07784	0.417159	424.466	4.42768	421.938	8.92065	408.124	52.5287	424.466	4.42768	104.004
14MO3-101 <>	71.5846	118568	0.475744	5.47156	0.411468	12.4499	1.46594	0.494056	1.40701	0.9598	2588.2	29.9936	2638.95	13.7791	2678.09	6.8086	2678.09	6.8086	96.6434
14MO3-102 <>	600.422	290911	1.64896	13.8006	0.356717	1.70825	1.46118	0.170982	1.41697	0.969743	1017.52	13.3376	1011.63	9.35855	998.883	7.23386	998.883	7.23386	101.866
14MO3-103 <>	257.16	53183	2.44332	18.2043	2.40062	0.522008	2.72522	0.0689206	1.28989	0.473318	429.649	5.36138	426.492	9.49083	409.444	53.7196	429.649	5.36138	104.935
14MO3-104 <>	153.719	38864	1.59405	18.6071	1.91609	0.497446	2.35322	0.067131	1.3661	0.580526	418.848	5.53996	409.972	7.93771	360.273	43.236	418.848	5.53996	116.258
Sample PUYEAR - Mississippian Ste. Genevieve Sandstone
							Isotope ratios						Apparent ages (Ma)
Analysis	U	206Pb	U/Th	206Pb*	±	207Pb*	±	206Pb*	±	error	206Pb*	±	207Pb*	±	206Pb*	±	Best age	±	Conc
	(ppm)	204Pb		207Pb*	(%)	235U*	(%)	238U	(%)	corr.	238U*	(Ma)	235U	(Ma)	207Pb*	(Ma)	(Ma)	(Ma)	(%)
ACHAPMAN-PUYEAR-33 <>	675.685	171319	1.03189	18.0074	1.48728	0.498024	2.00512	0.0650429	1.34481	0.670688	406.221	5.29435	410.364	6.76875	433.712	33.151	406.221	5.29435	93.6617
ACHAPMAN-PUYEAR-65 <>	162.905	35443.4	0.635766	18.1962	2.73557	0.492946	3.17227	0.0650545	1.60623	0.506333	406.292	6.32457	406.916	10.6358	410.438	61.1958	406.292	6.32457	98.9897
ACHAPMAN-PUYEAR-37 <>	232.381	75772.3	0.96784	17.7839	3.96832	0.521206	4.22042	0.0672255	1.4368	0.340439	419.418	5.83434	425.957	14.6838	461.472	87.9994	419.418	5.83434	90.8871
ACHAPMAN-PUYEAR-2 <>	54.4383	16436.4	0.868073	18.4484	12.8327	0.505556	12.9033	0.0676437	1.34841	0.104501	421.944	5.50732	415.456	44.0226	379.562	289.607	421.944	5.50732	111.166
ACHAPMAN-PUYEAR-96 <>	171.281	29667.8	0.862116	18.0827	4.91877	0.526	4.998	0.0689838	0.886425	0.177356	430.031	3.68754	429.152	17.4945	424.414	109.8	430.031	3.68754	101.323
ACHAPMAN-PUYEAR-64 <>	96.3312	8962.4	0.81406	17.2971	8.60901	0.560972	8.77392	0.0703743	1.69314	0.192974	438.41	7.1761	452.159	32.0268	522.663	189.16	438.41	7.1761	83.88
ACHAPMAN-PUYEAR-89 <>	282.027	79342.8	1.61882	17.7114	1.638	0.563699	1.78913	0.0724102	0.719686	0.402254	450.66	3.13257	453.931	6.54897	470.552	36.2562	450.66	3.13257	95.7726
ACHAPMAN-PUYEAR-73 <>	184.609	72566.9	1.20674	17.7169	3.21256	0.566968	3.40442	0.0728528	1.12675	0.330968	453.32	4.93234	456.052	12.5082	469.821	71.1485	453.32	4.93234	96.4879
ACHAPMAN-PUYEAR-98 <>	83.4975	64792	3.18213	19.1431	14.0843	0.536934	14.2893	0.0745475	2.4121	0.168804	463.495	10.7875	436.401	50.7304	295.829	322.849	463.495	10.7875	156.677
ACHAPMAN-PUYEAR-83 <>	125.648	54647	1.63103	17.8149	7.82987	0.579697	7.92729	0.0749004	1.23901	0.156296	465.611	5.56554	464.267	29.5464	457.641	173.928	465.611	5.56554	101.742
ACHAPMAN-PUYEAR-10 <>	254.368	47189.2	1.48402	17.8391	2.57216	0.583756	2.63978	0.0755272	0.593677	0.224896	469.37	2.68751	466.873	9.87996	454.621	57.1104	469.37	2.68751	103.244
ACHAPMAN-PUYEAR-3 <>	40.3157	12082.4	1.3681	18.8685	16.831	0.552292	16.9229	0.0755798	1.7614	0.104084	469.685	7.97885	446.497	61.2106	328.729	384.287	469.685	7.97885	142.879
ACHAPMAN-PUYEAR-40 <>	49.7428	13014.3	1.10553	16.7171	7.47159	0.741863	7.81199	0.0899461	2.2809	0.291974	555.219	12.1339	563.492	33.7957	597.058	162.052	555.219	12.1339	92.9924
ACHAPMAN-PUYEAR-38 <>	108.171	53346.3	3.47383	14.3216	2.49517	1.51502	2.67551	0.157365	0.965651	0.360922	942.117	8.46402	936.468	16.3663	923.221	51.2916	923.221	51.2916	102.047
ACHAPMAN-PUYEAR-71 <>	290.715	256422	2.23318	14.2326	0.83116	1.50398	0.980351	0.155248	0.519867	0.530286	930.312	4.5036	932.001	5.97899	935.994	17.028	935.994	17.028	99.393
ACHAPMAN-PUYEAR-16 <>	78.7814	32547.2	2.02311	14.0366	3.10319	1.52468	3.23368	0.155216	0.909321	0.281204	930.137	7.87606	940.359	19.8314	964.398	63.3805	964.398	63.3805	96.4474
ACHAPMAN-PUYEAR-60 <>	731.459	896342	2.21307	13.9779	0.476902	1.5707	0.853958	0.159233	0.708384	0.829531	952.515	6.27264	958.701	5.298	972.941	9.72545	972.941	9.72545	97.9006
ACHAPMAN-PUYEAR-91 <>	111.959	70971.5	2.58785	13.9752	1.0938	1.57822	2.20203	0.159965	1.91117	0.86791	956.582	16.9902	961.667	13.6876	973.334	22.3189	973.334	22.3189	98.279
ACHAPMAN-PUYEAR-36 <>	37.9194	17516.1	1.90681	13.9708	5.95128	1.52795	6.07965	0.154821	1.24277	0.204414	927.933	10.7405	941.676	37.3289	973.95	121.445	973.95	121.445	95.2752
ACHAPMAN-PUYEAR-7 <>	94.7931	46141.3	2.20368	13.9455	2.16287	1.60119	2.23833	0.161948	0.576293	0.257466	967.593	5.17786	970.673	13.9911	977.652	44.0724	977.652	44.0724	98.9711
ACHAPMAN-PUYEAR-90 <>	110.846	72850.5	2.33458	13.7527	3.03387	1.74272	3.13189	0.173826	0.777435	0.248232	1033.16	7.42153	1024.47	20.2088	1005.94	61.57	1005.94	61.57	102.706
ACHAPMAN-PUYEAR-82 <>	107.584	48847.5	2.43795	13.7173	2.13339	1.66748	2.28821	0.165893	0.827378	0.361583	989.443	7.58913	996.226	14.5249	1011.17	43.2766	1011.17	43.2766	97.8516
ACHAPMAN-PUYEAR-49 <>	95.9272	65184.6	1.54562	13.694	3.51817	1.72024	3.7278	0.170851	1.23248	0.33062	1016.8	11.5936	1016.11	23.9412	1014.62	71.3148	1014.62	71.3148	100.215
ACHAPMAN-PUYEAR-55 <>	51.5211	19491.6	0.837789	13.6808	5.40814	1.76537	5.52848	0.175164	1.14722	0.20751	1040.5	11.0233	1032.82	35.8508	1016.57	109.648	1016.57	109.648	102.355
ACHAPMAN-PUYEAR-57 <>	169.05	96251.7	2.1568	13.6538	1.32086	1.7204	1.3624	0.170366	0.333856	0.24505	1014.12	3.13284	1016.17	8.74866	1020.57	26.7611	1020.57	26.7611	99.3684
ACHAPMAN-PUYEAR-1 <>	93.9429	96104.6	2.59672	13.6331	1.60024	1.77927	1.90693	0.175929	1.03711	0.543864	1044.69	10.0023	1037.91	12.3964	1023.64	32.3926	1023.64	32.3926	102.057
ACHAPMAN-PUYEAR-15 <>	86.9862	33936.1	9.54882	13.6079	2.92664	1.69318	3.05768	0.167107	0.88556	0.289618	996.15	8.17372	1005.96	19.5215	1027.38	59.2099	1027.38	59.2099	96.9599
ACHAPMAN-PUYEAR-8 <>	108.923	104281	1.97464	13.6029	1.6544	1.80992	1.80238	0.178563	0.715217	0.396819	1059.12	6.98544	1049.05	11.7885	1028.12	33.4599	1028.12	33.4599	103.014
ACHAPMAN-PUYEAR-75 <>	200.532	118901	1.40809	13.6017	1.85061	1.73313	1.95965	0.170972	0.644561	0.328917	1017.46	6.06681	1020.92	12.6183	1028.31	37.4245	1028.31	37.4245	98.9454
ACHAPMAN-PUYEAR-50 <>	80.6498	60644.7	2.64714	13.5613	3.30829	1.74432	3.38707	0.171564	0.726298	0.214432	1020.72	6.85635	1025.06	21.8631	1034.32	66.8721	1034.32	66.8721	98.6854
ACHAPMAN-PUYEAR-41 <>	133.413	80035.9	1.13217	13.542	2.13354	1.76324	2.19049	0.173179	0.496246	0.226546	1029.6	4.72222	1032.04	14.1936	1037.19	43.0898	1037.19	43.0898	99.2683
ACHAPMAN-PUYEAR-29 <>	36.2266	19817.5	1.73531	13.5221	1.8744	1.85208	2.4585	0.181636	1.59086	0.647085	1075.9	15.7641	1064.17	16.2119	1040.17	37.8561	1040.17	37.8561	103.435
ACHAPMAN-PUYEAR-92 <>	603.026	358413	2.91293	13.4441	0.37029	1.77557	0.557144	0.173128	0.416287	0.74718	1029.32	3.96034	1036.56	3.61897	1051.87	7.48124	1051.87	7.48124	97.856
ACHAPMAN-PUYEAR-11 <>	329.454	132656	1.89862	13.4284	0.714852	1.80522	1.26191	0.175814	1.03991	0.824074	1044.06	10.0237	1047.35	8.2458	1054.23	14.4183	1054.23	14.4183	99.0361
ACHAPMAN-PUYEAR-19 <>	55.5974	62323.2	1.22604	13.3865	4.11482	1.7741	4.19934	0.172245	0.838291	0.199624	1024.47	7.94037	1036.02	27.2754	1060.51	82.8379	1060.51	82.8379	96.6013
ACHAPMAN-PUYEAR-62 <>	171.842	87179.5	2.27804	13.3778	1.56132	1.75345	2.03767	0.170129	1.30934	0.642568	1012.82	12.272	1028.44	13.1766	1061.82	31.4342	1061.82	31.4342	95.3849
ACHAPMAN-PUYEAR-81 <>	111.418	70007.1	2.24485	13.3659	1.47976	1.8125	1.68944	0.1757	0.815174	0.482512	1043.44	7.85317	1049.98	11.0554	1063.62	29.784	1063.62	29.784	98.1027
ACHAPMAN-PUYEAR-86 <>	238.907	150666	2.58623	13.3605	0.888545	1.83094	1.0726	0.177418	0.600793	0.560129	1052.85	5.83593	1056.62	7.04396	1064.42	17.8562	1064.42	17.8562	98.9132
ACHAPMAN-PUYEAR-93 <>	166.752	112403	1.91725	13.325	1.24953	1.83992	1.50513	0.177814	0.839092	0.55749	1055.02	8.16615	1059.83	9.90169	1069.77	25.1305	1069.77	25.1305	98.6209
ACHAPMAN-PUYEAR-22 <>	339.236	224623	1.69122	13.286	0.902171	1.90038	1.35766	0.183119	1.01456	0.747286	1083.99	10.1229	1081.22	9.03273	1075.66	18.1133	1075.66	18.1133	100.775
ACHAPMAN-PUYEAR-13 <>	142.308	151489	2.12836	13.2307	0.941985	1.86912	1.3036	0.179357	0.901137	0.691266	1063.46	8.83452	1070.22	8.62333	1084	18.8806	1084	18.8806	98.1055
ACHAPMAN-PUYEAR-23 <>	56.9657	22101.2	1.60632	13.13	3.11381	2.02247	3.43701	0.192596	1.45507	0.423353	1135.42	15.148	1123.09	23.3565	1099.32	62.3137	1099.32	62.3137	103.284
ACHAPMAN-PUYEAR-27 <>	33.7925	21077.3	1.65227	13.1259	3.85498	2.02044	6.13958	0.192343	4.77845	0.778302	1134.05	49.6922	1122.41	41.7243	1099.94	77.1658	1099.94	77.1658	103.102
ACHAPMAN-PUYEAR-39 <>	152.467	261576	4.78925	13.0005	1.8562	2.02811	2.78146	0.191228	2.07148	0.744745	1128.02	21.4366	1124.98	18.9179	1119.14	37.0265	1119.14	37.0265	100.794
ACHAPMAN-PUYEAR-17 <>	65.0912	51810.9	1.50526	12.988	2.72481	1.99722	2.83145	0.188135	0.769741	0.271854	1111.26	7.85716	1114.57	19.1601	1121.05	54.3493	1121.05	54.3493	99.1266
ACHAPMAN-PUYEAR-54 <>	115.766	99473.9	1.79331	12.957	1.67082	2.00216	1.77285	0.188149	0.59277	0.33436	1111.34	6.05112	1116.24	12.0057	1125.8	33.2991	1125.8	33.2991	98.7157
ACHAPMAN-PUYEAR-25 <>	89.9148	103949	2.44542	12.9038	2.21783	2.06298	2.27975	0.193068	0.527714	0.231479	1137.97	5.50506	1136.61	15.592	1133.98	44.1591	1133.98	44.1591	100.352
ACHAPMAN-PUYEAR-35 <>	200.273	140389	1.26592	12.8718	0.92246	2.03366	1.91475	0.189852	1.67789	0.8763	1120.57	17.2586	1126.84	13.034	1138.96	18.329	1138.96	18.329	98.3855
ACHAPMAN-PUYEAR-74 <>	321.638	237394	3.77218	12.8602	0.64728	2.04599	0.844409	0.190831	0.542269	0.642188	1125.88	5.60187	1130.96	5.75921	1140.74	12.8525	1140.74	12.8525	98.6973
ACHAPMAN-PUYEAR-94 <>	302.88	411064	5.29893	12.6888	0.52152	2.06056	0.84784	0.189629	0.668468	0.788437	1119.37	6.86899	1135.81	5.79606	1167.34	10.348	1167.34	10.348	95.8906
ACHAPMAN-PUYEAR-12 <>	68.6613	51509.7	1.7003	12.4299	1.85744	2.29746	2.18365	0.207117	1.14814	0.525792	1213.44	12.6993	1211.51	15.4495	1208.08	36.5595	1208.08	36.5595	100.443
ACHAPMAN-PUYEAR-18 <>	20.6816	21170.1	0.697409	11.8448	5.85301	2.58336	6.12954	0.221928	1.82031	0.296973	1292.05	21.3123	1295.93	44.8988	1302.34	113.785	1302.34	113.785	99.2099
ACHAPMAN-PUYEAR-61 <>	83.7927	65127.6	1.33448	11.7869	2.39619	2.57233	2.5067	0.2199	0.736097	0.293651	1281.34	8.55369	1292.8	18.3297	1311.87	46.4954	1311.87	46.4954	97.6733
ACHAPMAN-PUYEAR-47 <>	174.84	89469.2	1.46501	11.6379	1.74107	2.51325	2.24101	0.212133	1.41095	0.629606	1240.17	15.918	1275.87	16.2794	1336.5	33.6659	1336.5	33.6659	92.7923
ACHAPMAN-PUYEAR-56 <>	80.6674	30839.8	1.72972	11.5933	1.47159	2.65675	1.68036	0.223387	0.811192	0.48275	1299.75	9.54852	1316.52	12.3968	1343.92	28.425	1343.92	28.425	96.7133
ACHAPMAN-PUYEAR-100 <>	218.172	270948	1.39459	11.5612	0.65924	2.74667	0.975249	0.230308	0.718688	0.736928	1336.11	8.6727	1341.19	7.25962	1349.27	12.7231	1349.27	12.7231	99.0248
ACHAPMAN-PUYEAR-21 <>	110.267	85819.7	3.9274	11.5033	2.23271	2.5657	4.81552	0.214055	4.26664	0.886019	1250.39	48.4953	1290.92	35.1972	1358.97	43.0386	1358.97	43.0386	92.0101
ACHAPMAN-PUYEAR-72 <>	129.807	75115.3	2.32037	11.4287	1.02555	2.81253	1.292	0.233126	0.785815	0.608217	1350.86	9.57683	1358.88	9.67807	1371.5	19.7325	1371.5	19.7325	98.4953
ACHAPMAN-PUYEAR-95 <>	247.389	469504	2.51605	11.3629	0.602471	2.8862	1.36843	0.237857	1.22867	0.897868	1375.55	15.2194	1378.31	10.3197	1382.59	11.5735	1382.59	11.5735	99.4908
ACHAPMAN-PUYEAR-67 <>	691.573	253629	1.20671	11.2943	0.1699	2.88695	0.433378	0.236482	0.398685	0.919949	1368.38	4.91539	1378.51	3.26835	1394.22	3.2586	1394.22	3.2586	98.1469
ACHAPMAN-PUYEAR-42 <>	69.8765	45465.7	1.83869	10.8865	2.58536	3.24322	4.44665	0.256073	3.61782	0.813606	1469.72	47.5469	1467.55	34.5232	1464.41	49.1248	1464.41	49.1248	100.363
ACHAPMAN-PUYEAR-70 <>	73.5044	56216.4	2.01711	10.8599	2.45901	3.28546	3.02912	0.258773	1.76885	0.583948	1483.56	23.4414	1477.61	23.5843	1469.06	46.6942	1469.06	46.6942	100.987
ACHAPMAN-PUYEAR-32 <>	211.937	173873	2.30141	10.8456	0.712493	3.19534	1.44699	0.251343	1.25941	0.87037	1445.4	16.3072	1456.03	11.1908	1471.57	13.5231	1471.57	13.5231	98.2219
ACHAPMAN-PUYEAR-34 <>	106.641	48511.2	3.95921	10.7751	2.54367	2.71576	4.07338	0.212232	3.18154	0.781055	1240.7	35.9075	1332.77	30.2383	1483.93	48.2047	1483.93	48.2047	83.6091
ACHAPMAN-PUYEAR-20 <>	171.235	244465	2.02057	10.7487	0.864893	3.26759	0.958181	0.254731	0.412397	0.430396	1462.83	5.39716	1473.37	7.44955	1488.57	16.3784	1488.57	16.3784	98.2706
ACHAPMAN-PUYEAR-43 <>	87.2808	97111.2	1.48382	10.7399	1.28888	3.00316	1.88675	0.233926	1.37789	0.730301	1355.04	16.8393	1408.42	14.373	1490.12	24.403	1490.12	24.403	90.9351
ACHAPMAN-PUYEAR-69 <>	130.843	160427	1.72443	10.7243	1.06218	3.34951	1.25214	0.260526	0.663053	0.529535	1492.53	8.83416	1492.68	9.79124	1492.87	20.1031	1492.87	20.1031	99.9774
ACHAPMAN-PUYEAR-84 <>	333.441	197927	1.36557	10.6208	0.349243	3.40769	0.651635	0.262492	0.550144	0.844251	1502.58	7.37365	1506.17	5.11549	1511.2	6.59357	1511.2	6.59357	99.4294
ACHAPMAN-PUYEAR-88 <>	25.6482	15588.7	1.55406	10.3543	5.00327	3.48846	7.34997	0.261972	5.38418	0.732544	1499.92	72.0545	1524.61	58.0664	1559.02	93.919	1559.02	93.919	96.2093
ACHAPMAN-PUYEAR-76 <>	216.016	187984	1.39453	10.0277	1.03679	3.75525	2.09468	0.27311	1.82009	0.868913	1556.57	25.1701	1583.23	16.7978	1618.92	19.2986	1618.92	19.2986	96.1483
ACHAPMAN-PUYEAR-99 <>	176.341	169161	0.992127	9.87138	0.7588	4.001	1.06119	0.286448	0.741854	0.699077	1623.75	10.6486	1634.4	8.62076	1648.11	14.0722	1648.11	14.0722	98.5222
ACHAPMAN-PUYEAR-4 <>	142.631	106778	0.811657	9.85708	0.480264	3.99625	0.697062	0.285693	0.505214	0.724777	1619.97	7.23696	1633.43	5.66127	1650.8	8.90353	1650.8	8.90353	98.1326
ACHAPMAN-PUYEAR-85 <>	112.919	187214	4.60814	9.84027	0.87672	3.82427	1.25242	0.272932	0.894376	0.71412	1555.67	12.362	1597.87	10.0811	1653.96	16.2453	1653.96	16.2453	94.057
ACHAPMAN-PUYEAR-6 <>	112.742	221135	1.3953	9.80004	0.635932	4.06761	0.853719	0.289112	0.569585	0.66718	1637.09	8.23478	1647.83	6.95805	1661.55	11.7716	1661.55	11.7716	98.5278
ACHAPMAN-PUYEAR-51 <>	92.0098	56048.5	1.02421	9.79637	1.37446	4.06213	1.92891	0.288614	1.35334	0.701612	1634.6	19.5399	1646.74	15.718	1662.24	25.4431	1662.24	25.4431	98.3372
ACHAPMAN-PUYEAR-31 <>	106.508	104599	1.98478	9.75352	1.30919	4.07403	2.01636	0.288194	1.53353	0.760544	1632.5	22.1164	1649.12	16.4402	1670.35	24.2096	1670.35	24.2096	97.7337
ACHAPMAN-PUYEAR-63 <>	170.948	69378.5	2.04374	9.35593	0.354641	4.59625	0.868703	0.311881	0.793016	0.912874	1749.96	12.1533	1748.59	7.24461	1746.93	6.49349	1746.93	6.49349	100.173
ACHAPMAN-PUYEAR-77 <>	187.195	200037	1.94847	9.32121	0.485997	4.64192	0.751982	0.313811	0.573833	0.763094	1759.43	8.83567	1756.84	6.28223	1753.74	8.89353	1753.74	8.89353	100.325
ACHAPMAN-PUYEAR-46 <>	197.324	181198	2.03905	9.31142	0.549503	4.65765	1.05643	0.314544	0.902269	0.854074	1763.03	13.9175	1759.67	8.83105	1755.66	10.0533	1755.66	10.0533	100.42
ACHAPMAN-PUYEAR-30 <>	144.153	174436	1.53968	9.31084	0.795903	4.61996	1.13433	0.31198	0.808233	0.712521	1750.44	12.3895	1752.88	9.46862	1755.78	14.5593	1755.78	14.5593	99.6962
ACHAPMAN-PUYEAR-48 <>	38.4004	43454.4	1.23892	9.11627	1.99949	4.95922	2.25848	0.327891	1.05014	0.464978	1828.15	16.7161	1812.4	19.0863	1794.32	36.4062	1794.32	36.4062	101.886
ACHAPMAN-PUYEAR-80 <>	233.362	267863	1.41765	9.03665	0.245633	4.94212	1.43853	0.323906	1.41741	0.985314	1808.78	22.3551	1809.48	12.1491	1810.27	4.46365	1810.27	4.46365	99.9174
ACHAPMAN-PUYEAR-87 <>	245.115	281074	0.898988	8.89309	0.372103	5.13531	0.692634	0.331221	0.584193	0.843437	1844.3	9.37007	1841.97	5.88666	1839.32	6.738	1839.32	6.738	100.271
ACHAPMAN-PUYEAR-26 <>	105.303	185436	1.97382	8.88204	1.07958	5.07715	1.42331	0.327063	0.927537	0.651677	1824.13	14.7364	1832.3	12.0745	1841.57	19.5422	1841.57	19.5422	99.0531
ACHAPMAN-PUYEAR-78 <>	91.3336	98374.6	1.84686	8.83665	0.934801	5.0257	1.34794	0.322094	0.971132	0.720455	1799.95	15.2517	1823.66	11.4159	1850.84	16.9021	1850.84	16.9021	97.2505
ACHAPMAN-PUYEAR-53 <>	207.395	157339	2.60836	8.71706	0.445802	5.40456	1.67024	0.341687	1.60965	0.963722	1894.78	26.4259	1885.58	14.3123	1875.44	8.03741	1875.44	8.03741	101.032
ACHAPMAN-PUYEAR-79 <>	142.549	226409	3.5127	8.68348	0.924461	5.38908	2.36706	0.339396	2.17907	0.920581	1883.77	35.5952	1883.12	20.2756	1882.39	16.6517	1882.39	16.6517	100.073
ACHAPMAN-PUYEAR-68 <>	18.8761	27766.5	0.384765	8.60556	4.00908	5.31937	4.18909	0.332	1.21478	0.289986	1848.07	19.5186	1871.98	35.8192	1898.61	72.1019	1898.61	72.1019	97.3379
ACHAPMAN-PUYEAR-44 <>	69.5178	75533.5	0.714967	8.60214	1.07481	5.7916	1.69266	0.361329	1.30762	0.772523	1988.47	22.3738	1945.15	14.6573	1899.33	19.3211	1899.33	19.3211	104.694
ACHAPMAN-PUYEAR-97 <>	57.3838	64642	1.07368	8.50798	1.31436	5.44154	1.63553	0.335774	0.973364	0.595136	1866.31	15.7728	1891.42	14.0297	1919.09	23.5725	1919.09	23.5725	97.2497
ACHAPMAN-PUYEAR-28 <>	138.576	168619	1.94803	8.16536	0.45046	6.10232	0.898886	0.361384	0.77787	0.865371	1988.73	13.3111	1990.58	7.8422	1992.48	8.00773	1992.48	8.00773	99.8118
ACHAPMAN-PUYEAR-59 <>	120.151	161148	0.914052	5.90395	0.368817	11.186	0.458627	0.478977	0.272604	0.594391	2522.81	5.69119	2538.75	4.2747	2551.5	6.17461	2551.5	6.17461	98.8756
ACHAPMAN-PUYEAR-58 <>	99.702	365071	1.067	5.30545	0.545569	13.2721	0.750599	0.510693	0.515512	0.686801	2659.59	11.2342	2699.2	7.08756	2728.98	8.98139	2728.98	8.98139	97.4573
ACHAPMAN-PUYEAR-14 <>	92.5001	114831	4.97186	5.09503	0.531704	14.2893	1.09896	0.528027	0.961773	0.875165	2733.13	21.4248	2769.1	10.4292	2795.41	8.70359	2795.41	8.70359	97.7721
ACHAPMAN-PUYEAR-5 <>	66.7823	152054	2.85895	4.92646	0.44949	14.9364	1.85801	0.53368	1.80282	0.970296	2756.94	40.441	2811.2	17.6839	2850.34	7.32148	2850.34	7.32148	96.7232
Sample 15MO1 - Upper Pennsylvanian Moberly Sandstone
							Isotope ratios						Apparent ages (Ma)
Analysis	U	206Pb	U/Th	206Pb*	±	207Pb*	±	206Pb*	±	error	206Pb*	±	207Pb*	±	206Pb*	±	Best age	±	Conc
	(ppm)	204Pb		207Pb*	(%)	235U*	(%)	238U	(%)	corr.	238U*	(Ma)	235U	(Ma)	207Pb*	(Ma)	(Ma)	(Ma)	(%)
15MO1-Spot 103	568.404	68516.1	2.15774	18.7612	2.29236	0.360976	4.62447	0.0491175	4.01632	0.868493	309.101	12.1216	312.943	12.4549	341.661	51.89	309.101	12.1216	NA
15MO1-Spot 93	306.395	26551.6	2.40458	19.0832	2.12784	0.365047	3.37634	0.0505239	2.62144	0.776416	317.737	8.12737	315.976	9.16829	303.024	48.4954	317.737	8.12737	NA
15MO1-Spot 53	244.842	29048.8	0.890078	18.2648	2.73672	0.452253	3.72215	0.0599094	2.52285	0.677795	375.074	9.19256	378.856	11.7702	402.015	61.3289	375.074	9.19256	NA
15MO1-Spot 90	195.452	71826.2	0.840212	18.6012	2.35667	0.447987	2.99594	0.0604374	1.84981	0.617439	378.285	6.7962	375.869	9.41189	360.983	53.1735	378.285	6.7962	NA
15MO1-Spot 60	290.43	98983.8	2.96983	19.1364	2.82367	0.438981	3.80483	0.0609261	2.55023	0.67026	381.255	9.44094	369.533	11.7862	296.63	64.4475	381.255	9.44094	NA
15MO1-Spot 16	65.5672	11059.8	1.09833	19.2659	4.25487	0.439192	5.73583	0.0613681	3.84654	0.670616	383.94	14.3372	369.682	17.7749	281.256	97.404	383.94	14.3372	NA
15MO1-Spot 26	382.201	61604.4	1.57433	18.4493	1.77699	0.462942	5.9821	0.0619448	5.71208	0.954861	387.442	21.4791	386.302	19.2236	379.456	39.9402	387.442	21.4791	NA
15MO1-Spot 19	525.285	47577.3	9.6905	17.906	1.74669	0.485252	4.39318	0.0630181	4.03102	0.917563	393.954	15.4049	401.67	14.5749	446.274	38.838	393.954	15.4049	NA
15MO1-Spot 30	270.547	46241.5	4.15367	18.0361	1.65823	0.491595	2.62531	0.0643055	2.03532	0.775269	401.756	7.92745	405.997	8.78574	430.169	36.981	401.756	7.92745	93.3951
15MO1-Spot 15	319.506	30106.1	2.42783	18.0652	2.19291	0.543571	3.2783	0.0712195	2.43688	0.743337	443.498	10.4442	440.776	11.7227	426.565	48.9264	443.498	10.4442	103.97
15MO1-Spot 98	155.036	38755.2	1.99868	17.8346	2.56439	0.561099	3.68207	0.0725774	2.64226	0.717602	451.665	11.5257	452.242	13.4387	455.172	56.9262	451.665	11.5257	99.2296
15MO1-Spot 50	109.149	66621.4	1.96579	17.2554	2.23896	0.65718	3.21922	0.0822445	2.31311	0.718529	509.506	11.3317	512.888	12.9634	528.007	49.0879	509.506	11.3317	96.4961
15MO1-Spot 3	280.353	163162	2.42309	17.2963	2.10755	0.704901	3.37846	0.0884259	2.6405	0.781569	546.221	13.8289	541.714	14.1843	522.773	46.2408	546.221	13.8289	104.485
15MO1-Spot 28	119.743	52874.3	0.914435	16.4832	2.72548	0.749645	3.33726	0.0896181	1.9259	0.577089	553.278	10.2111	568.018	14.5196	627.456	58.7484	553.278	10.2111	88.1779
15MO1-Spot 107	108.758	38924.8	1.51177	16.7463	2.2703	0.738511	4.23833	0.0896963	3.57899	0.844434	553.741	18.9911	561.536	18.2832	593.273	49.2151	553.741	18.9911	93.3366
15MO1-Spot 21	803.67	241019	6.73206	17.0283	1.22197	0.726723	2.86796	0.089751	2.5946	0.904687	554.065	13.7753	554.628	12.2566	556.933	26.6284	554.065	13.7753	99.485
15MO1-Spot 71	292.185	25633.3	2.66681	17.0593	1.61754	0.732201	2.89056	0.0905922	2.3956	0.828766	559.038	12.8281	557.844	12.407	552.988	35.3225	559.038	12.8281	101.094
15MO1-Spot 8	203.112	48455.3	1.88029	17.1425	2.25177	0.729067	3.17113	0.0906444	2.23285	0.704117	559.347	11.9629	556.006	13.5777	542.336	49.2531	559.347	11.9629	103.137
15MO1-Spot 68	40.9151	6754.79	2.65696	17.0069	3.64738	0.762977	6.68055	0.0941098	5.59699	0.837804	579.797	31.0349	575.726	29.3648	559.668	79.5509	579.797	31.0349	103.597
15MO1-Spot 70	311.891	27041.3	2.8018	16.9316	2.00449	0.781382	3.809	0.0959535	3.2389	0.850328	590.651	18.2804	586.272	16.9663	569.369	43.6066	590.651	18.2804	103.738
15MO1-Spot 51	125.211	45550.1	1.36049	16.7011	2.52222	0.801235	3.8948	0.0970517	2.96781	0.761992	597.108	16.9251	597.525	17.5933	599.088	54.6138	597.108	16.9251	99.6695
15MO1-Spot 91	131.38	51789.3	1.28607	16.7497	2.63761	0.81441	4.41414	0.0989348	3.53944	0.801841	608.163	20.5415	604.925	20.1206	592.792	57.1821	608.163	20.5415	102.593
15MO1-Spot 92	96.9139	20127.9	2.28926	15.7707	2.15172	1.02636	2.92636	0.117395	1.98335	0.677755	715.553	13.4327	717.105	15.0513	721.942	45.6614	715.553	13.4327	99.1151
15MO1-Spot 33	71.146	30018.3	1.83958	14.3784	2.0613	1.48949	3.34287	0.155327	2.63169	0.787255	930.753	22.8084	926.107	20.3111	915.081	42.4164	915.081	42.4164	101.713
15MO1-Spot 27	350.89	100215	5.07161	13.8825	1.52589	1.64194	2.83764	0.165319	2.39246	0.843115	986.269	21.8797	986.457	17.9088	986.875	31.0529	986.875	31.0529	99.9385
15MO1-Spot 40	102.996	72051.9	3.12823	13.8713	1.78914	1.60726	4.77487	0.161697	4.42701	0.927147	966.198	39.723	973.041	29.8964	988.51	36.3816	988.51	36.3816	97.7428
15MO1-Spot 58	128.599	69964.8	2.85659	13.8094	1.49223	1.64026	2.9137	0.16428	2.50257	0.8589	980.521	22.7633	985.814	18.3818	997.6	30.3182	997.6	30.3182	98.288
15MO1-Spot 9	316.084	29741.2	5.00335	13.7906	1.32035	1.74124	2.45627	0.174157	2.07121	0.843236	1034.97	19.8043	1023.92	15.8436	1000.36	26.8022	1000.36	26.8022	103.46
15MO1-Spot 13	295.373	74373.5	5.56107	13.7694	2.02642	1.68562	2.91308	0.168334	2.09276	0.718401	1002.93	19.4377	1003.11	18.5672	1003.49	41.1154	1003.49	41.1154	99.9438
15MO1-Spot 48	339.327	97547.7	3.47331	13.7304	1.53148	1.77503	2.65644	0.176761	2.17054	0.817087	1049.25	21.0177	1036.36	17.2548	1009.24	31.0469	1009.24	31.0469	103.965
15MO1-Spot 23	210.743	159879	1.1934	13.7194	1.73044	1.76037	3.05854	0.175161	2.52195	0.824561	1040.48	24.2324	1030.98	19.8078	1010.86	35.0865	1010.86	35.0865	102.93
15MO1-Spot 80	54.7182	21406.4	1.26923	13.7079	2.23459	1.76067	3.30281	0.175044	2.43211	0.736375	1039.84	23.3559	1031.09	21.3915	1012.56	45.3046	1012.56	45.3046	102.695
15MO1-Spot 49	102.902	42682.4	3.00123	13.6736	2.37796	1.75083	3.95415	0.173629	3.15922	0.798961	1032.08	30.1295	1027.47	25.5597	1017.65	48.1768	1017.65	48.1768	101.418
15MO1-Spot 108	84.3443	78555.8	3.04999	13.6653	1.36013	1.68904	2.63202	0.167401	2.25335	0.856129	997.774	20.8298	1004.4	16.7881	1018.87	27.5565	1018.87	27.5565	97.9291
15MO1-Spot 2	171.758	38892.4	1.4457	13.632	1.33184	1.80383	2.74809	0.178343	2.40378	0.874712	1057.92	23.4531	1046.85	17.9535	1023.8	26.9568	1023.8	26.9568	103.332
15MO1-Spot 43	466.865	83147.8	3.27115	13.6282	1.51124	1.78248	2.53927	0.176182	2.0406	0.803617	1046.08	19.7045	1039.09	16.5185	1024.38	30.5987	1024.38	30.5987	102.119
15MO1-Spot 99	225.821	27486.6	1.33107	13.6144	1.7502	1.78512	3.20119	0.176264	2.68037	0.837305	1046.53	25.8925	1040.05	20.8365	1026.42	35.408	1026.42	35.408	101.959
15MO1-Spot 34	35.7213	13107.5	3.46581	13.6133	2.701	1.82296	3.38556	0.179986	2.04122	0.60292	1066.9	20.071	1053.75	22.2025	1026.59	54.6599	1026.59	54.6599	103.926
15MO1-Spot 17	53.339	24660.1	2.0324	13.568	2.11469	1.7692	3.05153	0.174096	2.19999	0.720945	1034.64	21.0293	1034.23	19.7982	1033.33	42.733	1033.33	42.733	100.127
15MO1-Spot 18	96.3735	27944.9	2.43309	13.561	1.87377	1.74698	3.07888	0.171821	2.44305	0.793487	1022.14	23.0924	1026.05	19.8843	1034.37	37.8645	1034.37	37.8645	98.8173
15MO1-Spot 81	104.902	40828.7	1.03368	13.5604	1.71069	1.7615	2.57669	0.173242	1.92687	0.747811	1029.95	18.3416	1031.4	16.6905	1034.46	34.5813	1034.46	34.5813	99.5637
15MO1-Spot 75	108.449	37341.4	4.33141	13.5478	1.72181	1.63443	3.28324	0.160596	2.79554	0.851457	960.086	24.9367	983.568	20.6858	1036.33	34.7962	1036.33	34.7962	92.6426
15MO1-Spot 39	112.764	18953.2	1.17209	13.5429	2.38889	1.82746	3.02892	0.179497	1.86214	0.614786	1064.23	18.2681	1055.37	19.8804	1037.06	48.2545	1037.06	48.2545	102.619
15MO1-Spot 5	144.074	46749.4	2.78145	13.5343	1.22436	1.75091	2.65451	0.17187	2.35529	0.887276	1022.41	22.2682	1027.5	17.1571	1038.34	24.7413	1038.34	24.7413	98.4655
15MO1-Spot 47	113.802	26697.8	1.95532	13.5112	1.65727	1.831	3.03346	0.179425	2.54073	0.83757	1063.83	24.9167	1056.64	19.9238	1041.79	33.4659	1041.79	33.4659	102.116
15MO1-Spot 84	267.984	57587.5	2.44794	13.5033	2.14578	1.88197	3.04474	0.184312	2.16011	0.709456	1090.49	21.6711	1074.76	20.1911	1042.97	43.307	1042.97	43.307	104.556
15MO1-Spot 45	158.61	44797.8	2.8981	13.4511	2.18356	1.76402	4.82959	0.172091	4.30778	0.891956	1023.62	40.7732	1032.33	31.3069	1050.83	44.0295	1050.83	44.0295	97.4111
15MO1-Spot 109	166.353	43123.4	3.75883	13.4004	1.53257	1.89604	2.44389	0.184274	1.90363	0.778935	1090.28	19.0948	1079.7	16.2477	1058.42	30.8653	1058.42	30.8653	103.01
15MO1-Spot 36	219.479	163013	2.39456	13.3934	1.62573	1.83018	2.24094	0.17778	1.54234	0.688256	1054.83	15.0078	1056.34	14.7153	1059.49	32.7228	1059.49	32.7228	99.5607
15MO1-Spot 56	44.0968	558003	1.55699	13.3869	2.5384	1.71835	3.33339	0.166836	2.16056	0.648156	994.656	19.9143	1015.41	21.3987	1060.45	51.0894	1060.45	51.0894	93.7956
15MO1-Spot 105	65.4656	125538	3.84858	13.3717	1.96123	1.9055	8.07521	0.184797	7.83343	0.970059	1093.13	78.7668	1083.01	53.8243	1062.74	39.4759	1062.74	39.4759	102.86
15MO1-Spot 4	613.869	145363	4.50993	13.3685	1.40634	1.81465	2.2556	0.175944	1.76351	0.781834	1044.78	17.0092	1050.76	14.767	1063.22	28.2903	1063.22	28.2903	98.2651
15MO1-Spot 46	106.954	28233.8	3.86065	13.3383	2.06354	1.75057	5.69065	0.169348	5.30333	0.931938	1008.52	49.5122	1027.37	36.7908	1067.77	41.485	1067.77	41.485	94.451
15MO1-Spot 86	349.473	143575	3.20595	13.3305	1.51184	1.85724	2.4205	0.179561	1.89028	0.780946	1064.58	18.5498	1066	15.9769	1068.95	30.3943	1068.95	30.3943	99.5912
15MO1-Spot 96	652.401	92965.7	14.4977	13.3215	1.64125	1.8984	2.73546	0.183417	2.18839	0.800008	1085.61	21.8649	1080.53	18.1943	1070.3	32.9902	1070.3	32.9902	101.431
15MO1-Spot 52	103.788	87312	2.17681	13.3099	2.37952	1.82471	3.02939	0.176144	1.87487	0.618892	1045.87	18.1008	1054.38	19.8729	1072.05	47.8258	1072.05	47.8258	97.558
15MO1-Spot 24	748.557	204867	4.64109	13.3	1.09422	1.79601	2.59694	0.173244	2.35516	0.906898	1029.96	22.4187	1044.01	16.9396	1073.55	21.9779	1073.55	21.9779	95.94
15MO1-Spot 73	100.629	32005.1	1.17158	13.2947	2.21361	1.87627	2.6015	0.180914	1.36666	0.525333	1071.97	13.4969	1072.75	17.233	1074.35	44.477	1074.35	44.477	99.7782
15MO1-Spot 38	1204.65	169884	3.34692	13.2607	1.82519	1.78181	4.77197	0.171367	4.40912	0.923963	1019.64	41.5826	1038.84	31.0454	1079.47	36.6474	1079.47	36.6474	94.458
15MO1-Spot 76	245.793	71706.6	0.813917	13.2411	1.66756	1.86574	2.66944	0.179174	2.0845	0.780876	1062.46	20.4183	1069.02	17.6485	1082.44	33.4483	1082.44	33.4483	98.1543
15MO1-Spot 55	68.7874	34382.8	1.62278	12.945	2.0431	2.05831	3.27891	0.193247	2.56456	0.782139	1138.94	26.7742	1135.06	22.4109	1127.62	40.7038	1127.62	40.7038	101.003
15MO1-Spot 31	1186.25	122719	5.38282	12.9343	1.13778	2.02673	5.31447	0.190124	5.19125	0.976814	1122.05	53.462	1124.52	36.149	1129.29	22.6456	1129.29	22.6456	99.3589
15MO1-Spot 37	117.201	40846.7	1.48339	12.9256	2.27036	2.09965	4.03711	0.196831	3.33822	0.826884	1158.28	35.3915	1148.69	27.7743	1130.64	45.2379	1130.64	45.2379	102.445
15MO1-Spot 6	83.1022	20157.5	1.44467	12.8203	1.9912	2.09801	2.82115	0.195077	1.9985	0.708398	1148.82	21.0297	1148.16	19.4014	1146.9	39.5728	1146.9	39.5728	100.167
15MO1-Spot 32	73.7072	144461	2.41423	12.7697	1.64688	2.08141	3.22496	0.192769	2.77275	0.859778	1136.36	28.8876	1142.7	22.1223	1154.74	32.6947	1154.74	32.6947	98.4081
15MO1-Spot 66	76.2686	36275.5	2.42148	12.7582	2.78557	2.09715	5.89996	0.194052	5.20097	0.881527	1143.29	54.4889	1147.87	40.5861	1156.53	55.267	1156.53	55.267	98.8553
15MO1-Spot 1	206.097	1.61925e+07	2.54886	12.748	1.51478	2.05559	2.73719	0.190054	2.27983	0.832911	1121.67	23.4711	1134.15	18.6993	1158.11	30.0464	1158.11	30.0464	96.8531
15MO1-Spot 42	236.981	133749	1.93898	12.5944	1.70911	2.24798	2.62668	0.205337	1.99459	0.759358	1203.93	21.9045	1196.16	18.4614	1182.16	33.8013	1182.16	33.8013	101.842
15MO1-Spot 10	112.391	98476.6	2.79086	12.574	1.99748	2.10998	3.87557	0.19242	3.32116	0.856948	1134.47	34.5488	1152.07	26.7046	1185.35	39.4466	1185.35	39.4466	95.7077
15MO1-Spot 62	197.67	32284.6	1.88025	12.5567	2.19915	2.18262	3.32005	0.198771	2.48727	0.749165	1168.72	26.5865	1175.52	23.123	1188.07	43.4336	1188.07	43.4336	98.3709
15MO1-Spot 29	147.944	26799.9	2.37867	12.4386	0.998425	2.22955	2.96944	0.201135	2.79655	0.941779	1181.42	30.1884	1190.38	20.8181	1206.71	19.6452	1206.71	19.6452	97.904
15MO1-Spot 106	129.755	97250.7	3.48802	12.3792	1.47057	2.23882	4.59214	0.201007	4.3503	0.947338	1180.73	46.9365	1193.29	32.2421	1216.13	28.9061	1216.13	28.9061	97.0887
15MO1-Spot 20	497.444	140962	3.87299	12.3397	1.41323	2.39284	2.82068	0.21415	2.4411	0.865432	1250.89	27.7557	1240.46	20.2018	1222.38	27.7683	1222.38	27.7683	102.332
15MO1-Spot 100	324.225	150656	3.55519	12.0486	1.58936	2.46194	3.22899	0.215136	2.81075	0.870473	1256.12	32.0799	1260.93	23.3202	1269.15	31.0063	1269.15	31.0063	98.9734
15MO1-Spot 61	86.8852	40187.4	3.04927	11.992	2.03754	2.59364	3.22833	0.22558	2.5041	0.775665	1311.29	29.712	1298.84	23.6626	1278.32	39.7227	1278.32	39.7227	102.579
15MO1-Spot 95	118.241	39190.2	1.60004	11.7262	1.90315	2.65862	4.36555	0.226106	3.92887	0.899972	1314.06	46.7065	1317.04	32.2221	1321.87	36.8751	1321.87	36.8751	99.4088
15MO1-Spot 85	224.278	84418.1	2.40609	11.583	1.77608	2.69593	5.70366	0.22648	5.42008	0.950281	1316.02	64.522	1327.34	42.2688	1345.64	34.2981	1345.64	34.2981	97.7994
15MO1-Spot 69	125.821	138776	3.34961	11.3831	1.22213	2.81385	2.113	0.232306	1.7237	0.815762	1346.58	20.9471	1359.23	15.8307	1379.17	23.4902	1379.17	23.4902	97.6365
15MO1-Spot 88	119.007	5.96703e+06	3.55957	11.3267	1.75028	2.38002	7.61212	0.195517	7.40817	0.973206	1151.19	78.1049	1236.62	54.477	1388.71	33.5985	1388.71	33.5985	82.8963
15MO1-Spot 79	94.9123	52912.5	3.4834	11.0644	1.94119	3.00728	2.92912	0.241324	2.19352	0.748866	1393.58	27.4902	1409.47	22.3234	1433.55	37.036	1433.55	37.036	97.2115
15MO1-Spot 104	156.613	56425.2	1.1738	10.3747	1.56367	3.44091	3.05842	0.258908	2.62848	0.859423	1484.25	34.848	1513.79	24.0663	1555.34	29.3498	1555.34	29.3498	95.4294
15MO1-Spot 78	424.228	95981.4	1.23811	9.83339	1.23075	4.16486	2.67282	0.297032	2.37259	0.887676	1676.57	35.0266	1667.14	21.8881	1655.26	22.8027	1655.26	22.8027	101.288
15MO1-Spot 87	56.0131	129282	2.27889	9.80762	1.89178	4.27366	3.38015	0.303992	2.80117	0.828713	1711.07	42.097	1688.3	27.8203	1660.12	35.031	1660.12	35.031	103.069
15MO1-Spot 57	135.004	57770.7	1.84772	9.77756	1.42179	4.07717	3.1332	0.289127	2.79203	0.891112	1637.16	40.368	1649.75	25.5533	1665.8	26.3074	1665.8	26.3074	98.2812
15MO1-Spot 89	44.1529	23857.8	1.86678	9.5799	4.30701	3.61265	5.06706	0.251007	2.66922	0.526779	1443.67	34.5249	1552.32	40.3171	1703.49	79.344	1703.49	79.344	84.7475
15MO1-Spot 64	216.066	83737	1.39292	9.51209	1.27211	4.38921	2.27195	0.302804	1.88242	0.828548	1705.2	28.2046	1710.31	18.7905	1716.56	23.3865	1716.56	23.3865	99.338
15MO1-Spot 65	382.68	182667	2.71356	9.01416	1.45388	5.00973	2.36442	0.327521	1.8646	0.788607	1826.35	29.6555	1820.97	20.0157	1814.8	26.4051	1814.8	26.4051	100.637
15MO1-Spot 110	231.587	238857	0.966689	8.637	1.11375	5.45113	2.17471	0.341467	1.86787	0.858904	1893.72	30.6504	1892.93	18.6609	1892.05	20.0386	1892.05	20.0386	100.088
15MO1-Spot 83	128.831	255906	1.63444	7.34054	1.26056	7.51646	2.82172	0.400166	2.52449	0.894666	2169.8	46.5116	2174.95	25.2923	2179.8	21.9438	2179.8	21.9438	99.5416
15MO1-Spot 82	233.553	110264	1.64775	5.62646	1.61548	12.2494	2.75076	0.499861	2.22641	0.809379	2613.2	47.8332	2623.7	25.8283	2631.81	26.8483	2631.81	26.8483	99.293
15MO1-Spot 67	77.9481	177674	0.807655	5.44377	1.45219	13.0968	3.49226	0.517086	3.17601	0.909442	2686.81	69.7862	2686.65	32.9559	2686.52	24.0089	2686.52	24.0089	100.011
15MO1-Spot 102	265.649	167491	1.866	5.39781	1.50447	12.7357	3.14058	0.498587	2.75678	0.877793	2607.72	59.1277	2660.31	29.5757	2700.52	24.8407	2700.52	24.8407	96.5636
Sample 15MO2 - Upper Pennsylvanian Warrensburg Sandstone
							Isotope ratios						Apparent ages (Ma)
Analysis	U	206Pb	U/Th	206Pb*	±	207Pb*	±	206Pb*	±	error	206Pb*	±	207Pb*	±	206Pb*	±	Best age	±	Conc
	(ppm)	204Pb		207Pb*	(%)	235U*	(%)	238U	(%)	corr.	238U*	(Ma)	235U	(Ma)	207Pb*	(Ma)	(Ma)	(Ma)	(%)
-Spot 79	735.244	164719	2.08087	19.288	2.1444	0.341864	3.82663	0.0478232	3.16933	0.82823	301.144	9.32475	298.583	9.89932	278.636	49.1082	301.144	9.32475	NA
-Spot 26	735.766	210253	3.55686	17.6275	1.9181	0.400375	4.51058	0.0511868	4.08244	0.905079	321.804	12.8149	341.92	13.0951	481.008	42.3805	321.804	12.8149	NA
-Spot 58	176.82	33302	0.657894	15.4494	4.02192	0.481921	5.03385	0.0539989	3.02717	0.601362	339.026	9.99769	399.39	16.6234	765.475	84.7916	339.026	9.99769	NA
-Spot 40	305.867	30480	0.928324	18.6466	2.06836	0.451278	4.19006	0.0610297	3.64397	0.86967	381.884	13.5116	378.174	13.2303	355.498	46.6908	381.884	13.5116	NA
-Spot 86	434.751	138629	1.72992	18.3449	1.8298	0.469488	3.10188	0.0624651	2.50469	0.807476	390.6	9.49282	390.835	10.063	392.207	41.0535	390.6	9.49282	NA
-Spot 36	311.919	31068.9	1.82818	17.879	1.99114	0.489558	3.78426	0.0634814	3.21807	0.850383	396.763	12.3831	404.609	12.6293	449.627	44.24	396.763	12.3831	NA
-Spot 82	588.702	120441	20.4012	18.3537	1.56259	0.487036	2.55165	0.0648311	2.01723	0.79056	404.939	7.91729	402.888	8.48594	391.124	35.0566	404.939	7.91729	103.532
-Spot 84	596.555	65153.1	2.9787	17.7741	2.12532	0.51257	2.80119	0.0660753	1.82474	0.651417	412.467	7.29072	420.176	9.63879	462.73	47.1151	412.467	7.29072	89.1378
-Spot 2	482.863	35541.9	1.35551	17.9257	1.76345	0.516204	3.95304	0.0671112	3.53791	0.894984	418.728	14.3434	422.612	13.6663	443.839	39.2342	418.728	14.3434	94.3422
-Spot 33	540.422	42512	1.85036	17.787	1.82409	0.524199	4.08906	0.0676233	3.65966	0.894988	421.821	14.943	427.952	14.2803	461.085	40.4517	421.821	14.943	91.4844
-Spot 52	315.238	40235	1.70577	17.6693	2.43294	0.529716	6.59406	0.0678832	6.12882	0.929445	423.39	25.1152	431.621	23.1895	475.815	53.8279	423.39	25.1152	88.9821
-Spot 108	605.155	73024.6	3.27533	17.3526	1.55086	0.585126	4.66627	0.0736399	4.40101	0.943154	458.048	19.4593	467.751	17.4916	515.636	34.0546	458.048	19.4593	88.8315
-Spot 83	357.273	48942.4	2.37849	17.8637	2.64394	0.568802	5.18597	0.073694	4.46138	0.860278	458.373	19.7397	457.24	19.0943	451.528	58.7331	458.373	19.7397	101.516
-Spot 9	741.69	79043	1.0199	17.8775	2.21684	0.597828	3.97856	0.0775144	3.30372	0.830381	481.269	15.3208	475.854	15.1159	449.814	49.2464	481.269	15.3208	106.993
-Spot 35	47.1591	37316	1.21725	17.5535	4.93739	0.680346	5.97878	0.0866146	3.37164	0.563935	535.484	17.3251	526.983	24.5843	490.318	108.967	535.484	17.3251	109.212
-Spot 17	125.637	39088.2	1.45054	17.3571	2.10445	0.692751	2.95841	0.0872076	2.07929	0.702842	539.001	10.7517	534.452	12.294	515.061	46.223	539.001	10.7517	104.648
-Spot 10	745.322	101147	39.2878	16.7693	1.3026	0.761331	3.2153	0.0925948	2.93962	0.914261	570.865	16.0597	574.778	14.1127	590.283	28.2503	570.865	16.0597	96.7104
-Spot 4	61.5534	17636.4	0.832138	17.8627	2.77505	0.719407	4.07899	0.0932008	2.98953	0.732908	574.439	16.4301	550.317	17.3309	451.66	61.6311	574.439	16.4301	127.184
-Spot 3	210.788	35339.3	1.5487	17.2672	1.88888	0.758226	3.02481	0.0949555	2.36254	0.781055	584.778	13.2076	572.986	13.2458	526.499	41.4156	584.778	13.2076	111.069
-Spot 12	170.119	92644.6	1.90666	16.4523	1.7724	0.887558	3.33002	0.105906	2.81915	0.846588	648.93	17.4037	645.057	15.9004	631.539	38.1541	648.93	17.4037	102.754
-Spot 98	321.948	51739.4	2.93825	16.5695	1.40014	0.983941	2.96699	0.118243	2.61584	0.881649	720.445	17.8308	695.624	14.9423	616.192	30.2331	720.445	17.8308	116.919
-Spot 92	143.655	40656.5	2.85883	14.3712	1.85747	1.60997	3.76913	0.167807	3.27965	0.870136	1000.01	30.38	974.097	23.6119	916.116	38.2141	916.116	38.2141	109.158
-Spot 27	186.877	139201	2.24945	14.3203	2.40245	1.48925	5.64233	0.154675	5.1053	0.904822	927.115	44.0865	926.012	34.2888	923.407	49.375	923.407	49.375	100.401
-Spot 100	72.0845	29677.1	3.00692	14.2784	2.91795	1.45659	4.60974	0.150839	3.56864	0.774153	905.666	30.1526	912.598	27.7599	929.424	59.9168	929.424	59.9168	97.4438
-Spot 34	64.1222	86679.4	1.44265	14.2068	3.09959	1.64616	3.80363	0.169616	2.20458	0.579598	1010	20.6096	988.08	24.0307	939.701	63.5474	939.701	63.5474	107.481
-Spot 1	283.634	63064.3	1.93176	14.0955	1.75419	1.66414	3.11084	0.170126	2.56908	0.825846	1012.81	24.0788	994.955	19.7331	955.794	35.8537	955.794	35.8537	105.965
-Spot 94	63.8608	25114.8	4.59366	14.0937	3.00602	1.49949	4.37063	0.153274	3.17273	0.725921	919.288	27.1825	930.178	26.6296	956.058	61.4706	956.058	61.4706	96.154
-Spot 44	323.721	102266	3.16912	14.0593	1.54857	1.61621	4.18921	0.164801	3.89248	0.929168	983.404	35.5024	976.52	26.2835	961.088	31.6286	961.088	31.6286	102.322
-Spot 2	32.1984	217889	4.71498	14.0399	4.63765	1.71296	5.65444	0.174425	3.23496	0.57211	1036.44	30.9723	1013.39	36.2667	963.92	94.7612	963.92	94.7612	107.524
-Spot 40	289.662	199391	2.75794	13.9127	1.73854	1.70129	2.79707	0.171668	2.19114	0.78337	1021.29	20.6954	1009.02	17.889	982.472	35.4044	982.472	35.4044	103.952
-Spot 29	166.467	135171	2.72042	13.81	2.3835	1.73077	4.03698	0.173353	3.25823	0.807098	1030.56	31.0317	1020.04	25.9857	997.504	48.4342	997.504	48.4342	103.313
-Spot 101	233.705	85538.3	3.74897	13.8049	2.71417	1.85116	4.31571	0.185343	3.35538	0.777482	1096.1	33.8218	1063.84	28.4589	998.252	55.1506	998.252	55.1506	109.802
-Spot 21	741.804	60510.1	3.81459	13.7045	1.75667	1.75037	2.91666	0.173977	2.3283	0.798277	1033.99	22.2429	1027.3	18.8497	1013.07	35.6238	1013.07	35.6238	102.064
-Spot 90	219.116	124837	1.83915	13.6981	2.37043	1.8129	3.35199	0.180109	2.37	0.707042	1067.57	23.3174	1050.13	21.9392	1014.01	48.0625	1014.01	48.0625	105.282
-Spot 37	436.88	167072	0.993228	13.6619	1.74363	1.65656	3.21356	0.164141	2.69939	0.84	979.747	24.5357	992.063	20.3499	1019.38	35.3121	1019.38	35.3121	96.1123
-Spot 46	148.123	44771.1	3.62041	13.6589	1.95224	1.70723	3.48456	0.169124	2.88633	0.82832	1007.28	26.9161	1011.25	22.3159	1019.83	39.5506	1019.83	39.5506	98.7703
-Spot 22	242.762	205442	3.4857	13.6489	2.15783	1.81157	3.10955	0.179329	2.239	0.720038	1063.31	21.9477	1049.64	20.3466	1021.3	43.6879	1021.3	43.6879	104.114
-Spot 54	276.326	136972	3.25972	13.6433	1.81802	1.79653	3.77282	0.177768	3.3059	0.876241	1054.77	32.1666	1044.2	24.6148	1022.13	36.8051	1022.13	36.8051	103.193
-Spot 39	216.045	38066.7	3.18357	13.6254	1.50775	1.69571	3.7711	0.167571	3.45658	0.916595	998.717	31.9804	1006.92	24.0912	1024.79	30.5069	1024.79	30.5069	97.4558
-Spot 41	260.546	55158.8	6.70482	13.5981	1.88279	1.79358	4.40427	0.176888	3.98155	0.904019	1049.95	38.5779	1043.13	28.7197	1028.84	38.0717	1028.84	38.0717	102.051
-Spot 91	49.6301	18575.1	1.63435	13.5698	3.18415	1.58811	4.65356	0.156297	3.39365	0.729258	936.164	29.5712	965.554	29.0022	1033.06	64.351	1033.06	64.351	90.6204
-Spot 69	36.4228	15937.2	1.82395	13.5505	2.75881	1.81629	4.69617	0.1785	3.8004	0.809254	1058.78	37.1075	1051.35	30.762	1035.93	55.7328	1035.93	55.7328	102.206
-Spot 87	498.788	100291	3.93636	13.5422	2.37768	1.77429	3.50595	0.174267	2.57649	0.734891	1035.58	24.6489	1036.09	22.771	1037.16	48.0248	1037.16	48.0248	99.847
-Spot 19	465.002	76683	3.53527	13.533	1.57417	1.83994	3.03683	0.180591	2.59699	0.855164	1070.2	25.6087	1059.84	19.9803	1038.55	31.8029	1038.55	31.8029	103.048
-Spot 4	165.073	66221.3	4.60102	13.5312	2.23661	1.77384	3.83129	0.17408	3.11068	0.811916	1034.55	29.7323	1035.93	24.8825	1038.81	45.1607	1038.81	45.1607	99.5904
-Spot 38	151.894	109333	10.5934	13.5291	2.24153	1.73014	2.8942	0.169766	1.83083	0.632586	1010.82	17.1285	1019.8	18.6253	1039.12	45.2586	1039.12	45.2586	97.2767
-Spot 13	329.652	157869	6.25137	13.5264	2.20299	1.8007	4.28519	0.176654	3.67555	0.857734	1048.67	35.5729	1045.71	27.9824	1039.52	44.4952	1039.52	44.4952	100.88
-Spot 24	97.7149	31070.1	5.90423	13.483	1.937	1.78657	4.83236	0.174704	4.42716	0.916148	1037.98	42.4448	1040.57	31.4687	1046.05	39.0751	1046.05	39.0751	99.2282
-Spot 56	201.317	47329	3.4834	13.4744	1.76096	1.83152	2.79535	0.178986	2.17095	0.776627	1061.43	21.2461	1056.83	18.3614	1047.34	35.5103	1047.34	35.5103	101.346
-Spot 28	332.742	74020.2	3.37164	13.4621	1.61117	1.82116	2.57363	0.177811	2.00691	0.779797	1055.01	19.5313	1053.1	16.8708	1049.18	32.4981	1049.18	32.4981	100.556
-Spot 13	342.738	215848	2.9811	13.4325	1.59298	1.87525	2.59413	0.182689	2.04741	0.78925	1081.65	20.3877	1072.38	17.1809	1053.62	32.1038	1053.62	32.1038	102.661
-Spot 23	832.746	64836.2	4.2482	13.3702	1.38832	1.71224	3.7728	0.166036	3.50808	0.929833	990.231	32.2018	1013.12	24.1887	1062.97	27.9292	1062.97	27.9292	93.1569
-Spot 28	116.075	39172.6	0.811991	13.3662	1.80781	1.81828	2.84404	0.176266	2.19553	0.771978	1046.54	21.2091	1052.06	18.6333	1063.57	36.3727	1063.57	36.3727	98.3994
-Spot 10	379.646	177818	3.53213	13.3447	2.4057	1.91636	8.22775	0.185474	7.8682	0.956299	1096.81	79.361	1086.8	54.9504	1066.81	48.3722	1066.81	48.3722	102.812
-Spot 27	342.954	76923.4	2.22724	13.3194	2.6107	1.89423	4.45046	0.182985	3.60428	0.809867	1083.26	35.94	1079.07	29.584	1070.62	52.4754	1070.62	52.4754	101.181
-Spot 95	178.415	38091	4.40208	13.2928	1.35269	1.84145	5.74466	0.177532	5.58313	0.971882	1053.48	54.2637	1060.38	37.8195	1074.64	27.1643	1074.64	27.1643	98.0307
-Spot 49	167.553	67211.5	3.24909	13.2903	2.42884	1.83529	5.49859	0.176905	4.93308	0.897152	1050.04	47.8015	1058.18	36.1553	1075.01	48.7774	1075.01	48.7774	97.677
-Spot 105	394.179	632942	2.31955	13.2587	1.62877	1.82274	3.99381	0.175276	3.64659	0.913061	1041.11	35.0584	1053.67	26.1919	1079.76	32.6657	1079.76	32.6657	96.421
-Spot 72	120.061	30891.8	1.51865	13.2073	2.24122	2.01243	5.10214	0.192767	4.58353	0.898355	1136.35	47.7534	1119.71	34.6222	1087.54	44.9414	1087.54	44.9414	104.488
-Spot 18	83.9689	28093	3.80825	13.1392	2.44744	1.95064	4.57294	0.185886	3.86288	0.844725	1099.05	39.0336	1098.67	30.7057	1097.89	48.982	1097.89	48.982	100.105
-Spot 37	107.649	241672	1.7189	13.0333	1.32724	1.99425	2.38649	0.188509	1.98337	0.831084	1113.29	20.2794	1113.56	16.1405	1114.07	26.4923	1114.07	26.4923	99.9308
-Spot 7	164.988	46453.5	3.08554	12.9753	1.63077	2.16558	2.75816	0.203794	2.22442	0.806486	1195.67	24.276	1170.06	19.1612	1122.98	32.5151	1122.98	32.5151	106.473
-Spot 26	268.21	173136	4.65992	12.9457	2.53024	2.25536	4.52296	0.211759	3.749	0.828883	1238.18	42.2344	1198.46	31.8282	1127.51	50.4261	1127.51	50.4261	109.815
-Spot 21	1088.32	115236	6.90361	12.9445	1.71842	1.63357	3.36217	0.153363	2.88984	0.859518	919.79	24.7714	983.236	21.179	1127.71	34.2201	1127.71	34.2201	81.5629
-Spot 15	109.201	41722.9	2.84367	12.9274	2.11959	2.2249	3.78322	0.208603	3.1337	0.828316	1221.37	34.8671	1188.92	26.5084	1130.35	42.2256	1130.35	42.2256	108.052
-Spot 7	278.442	64519.2	2.03567	12.9266	1.78997	2.10811	4.82195	0.197641	4.47741	0.928548	1162.63	47.6324	1151.46	33.2204	1130.48	35.6308	1130.48	35.6308	102.844
-Spot 30	57.1432	18675.4	1.90289	12.873	3.04723	2.0749	4.89584	0.193721	3.83192	0.782689	1141.5	40.088	1140.55	33.5569	1138.76	60.6173	1138.76	60.6173	100.24
-Spot 106	252.392	105375	2.70535	12.8626	2.12386	2.10568	3.25935	0.196435	2.47237	0.758547	1156.14	26.1676	1150.67	22.4423	1140.35	42.2393	1140.35	42.2393	101.385
-Spot 88	333.032	88930.3	4.14198	12.8126	1.95999	2.13976	3.0125	0.198838	2.28772	0.759406	1169.07	24.4603	1161.75	20.8491	1148.11	38.953	1148.11	38.953	101.826
-Spot 38	885.305	138744	160.169	12.8026	1.824	2.18301	3.45901	0.2027	2.93901	0.849668	1189.81	31.9314	1175.64	24.0924	1149.64	36.2442	1149.64	36.2442	103.494
-Spot 89	33.2491	31673.9	1.49925	12.786	3.59181	2.33514	4.98567	0.216544	3.45772	0.693531	1263.59	39.6763	1223.04	35.4592	1152.21	71.3055	1152.21	71.3055	109.667
-Spot 22	284.213	178520	2.4176	12.7798	1.37994	2.05684	2.83412	0.190644	2.47548	0.873456	1124.86	25.5517	1134.57	19.3655	1153.17	27.3975	1153.17	27.3975	97.5449
-Spot 107	205.259	26691.3	4.00634	12.7757	1.83013	2.20945	7.32514	0.204724	7.09284	0.968287	1200.65	77.7034	1184.04	51.247	1153.81	36.3131	1153.81	36.3131	104.06
-Spot 47	418.281	126392	4.617	12.7642	1.88163	2.15534	3.36687	0.199531	2.79201	0.829258	1172.8	29.9389	1166.77	23.3562	1155.59	37.3373	1155.59	37.3373	101.489
-Spot 20	414.8	145199	4.40717	12.7448	1.51851	2.16846	2.92359	0.200439	2.4983	0.854531	1177.68	26.891	1170.99	20.3192	1158.62	30.1177	1158.62	30.1177	101.645
-Spot 64	620.562	71903.3	7.50928	12.712	1.95468	1.85259	3.78628	0.170802	3.24271	0.856436	1016.53	30.4957	1064.35	24.973	1163.72	38.7482	1163.72	38.7482	87.3513
-Spot 25	49.9791	25788.7	1.68492	12.6933	2.76577	2.13685	4.92138	0.19672	4.07069	0.827144	1157.68	43.1368	1160.81	34.0534	1166.64	54.7985	1166.64	54.7985	99.2317
-Spot 31	243.945	186563	3.56865	12.6894	1.53038	2.27279	3.03269	0.20917	2.61823	0.863337	1224.4	29.1973	1203.88	21.3877	1167.24	30.3147	1167.24	30.3147	104.896
-Spot 5	219.613	185341	3.02115	12.6432	1.88285	2.27058	5.71025	0.208206	5.3909	0.944075	1219.26	59.8887	1203.2	40.274	1174.5	37.2588	1174.5	37.2588	103.811
-Spot 50	176.133	71840.1	2.95014	12.6098	2.09998	2.13021	4.01137	0.194819	3.41777	0.852021	1147.43	35.9248	1158.65	27.7255	1179.73	41.5207	1179.73	41.5207	97.2613
-Spot 39	394.379	193287	7.28892	12.6044	1.82815	2.20349	4.04046	0.201432	3.60321	0.891784	1183.01	38.9443	1182.15	28.2267	1180.59	36.1555	1180.59	36.1555	100.205
-Spot 15	366.775	70721.5	2.92499	12.5866	1.77365	2.29709	4.3269	0.209694	3.94668	0.912125	1227.19	44.1029	1211.39	30.6186	1183.37	35.053	1183.37	35.053	103.703
-Spot 48	473.551	106541	3.97939	12.557	1.94555	2.20727	3.6209	0.20102	3.05381	0.843384	1180.8	32.9498	1183.35	25.3079	1188.03	38.4235	1188.03	38.4235	99.3909
-Spot 31	285.672	34325.7	2.65299	12.537	1.72589	2.3242	2.8837	0.211333	2.31021	0.801125	1235.92	25.9822	1219.71	20.4751	1191.13	34.0693	1191.13	34.0693	103.76
-Spot 42	89.5374	43543.5	2.42202	12.5331	2.19172	2.12023	3.59386	0.192726	2.84819	0.792516	1136.13	29.6682	1155.41	24.8013	1191.78	43.2629	1191.78	43.2629	95.3298
-Spot 66	263.615	295318	4.97718	12.5025	2.3025	2.27715	4.73956	0.206485	4.14269	0.874068	1210.06	45.7062	1205.23	33.4519	1196.57	45.437	1196.57	45.437	101.128
-Spot 62	69.363	150501	2.5008	12.4866	3.00748	2.17614	5.75173	0.197074	4.90279	0.852404	1159.58	52.0332	1173.45	40.035	1199.11	59.3183	1199.11	59.3183	96.7039
-Spot 85	77.882	31171.2	4.11082	12.4434	2.81314	2.25698	6.64082	0.203688	6.01554	0.905843	1195.1	65.6236	1198.97	46.7597	1205.91	55.4103	1205.91	55.4103	99.1036
-Spot 20	115.38	33291.9	2.49867	12.3484	2.43949	2.14455	4.22947	0.192064	3.45504	0.816896	1132.55	35.8857	1163.29	29.2964	1221.01	47.9339	1221.01	47.9339	92.7547
-Spot 104	104.531	95536.1	3.62217	12.3427	1.35977	2.19011	2.70638	0.196054	2.33998	0.864617	1154.09	24.7262	1177.9	18.8682	1221.9	26.7135	1221.9	26.7135	94.4499
-Spot 19	365.025	189823	2.49955	12.3008	1.54095	2.37131	4.94786	0.211555	4.70179	0.950267	1237.09	52.9262	1234	35.3519	1228.58	30.2686	1228.58	30.2686	100.693
-Spot 45	710.045	64373.7	6.04291	12.252	1.5878	2.15699	3.57072	0.19167	3.19828	0.895694	1130.41	33.1616	1167.3	24.7769	1236.42	31.1563	1236.42	31.1563	91.4266
-Spot 55	260.351	42130	6.10656	12.2466	2.21059	2.24943	3.94362	0.199795	3.2658	0.828122	1174.22	35.0583	1196.61	27.7267	1237.28	43.3487	1237.28	43.3487	94.9032
-Spot 6	236.23	86986.9	2.93724	12.1373	1.64381	2.54869	2.68831	0.224355	2.12719	0.791271	1304.85	25.1278	1286.06	19.6071	1254.81	32.1525	1254.81	32.1525	103.988
-Spot 14	75.3509	38961.9	1.65965	12.1344	3.22245	2.39821	4.91147	0.211058	3.70653	0.754668	1234.45	41.6418	1242.07	35.2089	1255.27	63.0207	1255.27	63.0207	98.3417
-Spot 34	90.3321	40203.5	1.95872	12.0778	2.37482	2.41428	3.94338	0.211482	3.14808	0.798322	1236.71	35.4263	1246.86	28.3204	1264.45	46.3851	1264.45	46.3851	97.8065
-Spot 48	158.093	43452.4	3.40979	12.0657	2.15518	2.31751	3.36884	0.202802	2.58926	0.768592	1190.36	28.1433	1217.66	23.9001	1266.37	42.0875	1266.37	42.0875	93.9979
-Spot 11	167.404	65146.5	1.88493	11.9933	1.70601	2.702	7.2999	0.23503	7.09775	0.972308	1360.81	87.0784	1329.01	54.1511	1278.11	33.2603	1278.11	33.2603	106.471
-Spot 16	193.436	129384	3.29557	11.7906	1.87968	2.64554	3.19762	0.22623	2.5868	0.808979	1314.71	30.7654	1313.4	23.5661	1311.25	36.4753	1311.25	36.4753	100.264
-Spot 5	74.1796	66992.5	2.10061	11.7743	1.65168	2.60104	3.58388	0.222116	3.18059	0.88747	1293.05	37.2647	1300.93	26.2905	1313.94	32.0382	1313.94	32.0382	98.4098
-Spot 65	72.5534	37045.3	3.41996	11.686	2.24718	2.65453	4.31968	0.224985	3.68915	0.854033	1308.16	43.6792	1315.9	31.8699	1328.52	43.5028	1328.52	43.5028	98.468
-Spot 102	161.619	66857.9	2.5015	11.5787	1.74952	2.66338	2.77088	0.223662	2.14871	0.775462	1301.19	25.318	1318.36	20.4578	1346.36	33.7819	1346.36	33.7819	96.6456
-Spot 103	96.2937	35405	3.90558	11.56	3.0139	2.87419	4.03	0.240974	2.67531	0.663849	1391.76	33.4891	1375.17	30.3668	1349.48	58.1796	1349.48	58.1796	103.133
-Spot 99	81.4616	49453.3	2.87125	11.4584	2.6527	3.00883	4.77146	0.250046	3.96611	0.831215	1438.72	51.1431	1409.86	36.3787	1366.49	51.0833	1366.49	51.0833	105.285
-Spot 97	231.618	55707.8	2.84968	11.3677	1.73769	2.77939	5.16616	0.229151	4.86514	0.941733	1330.05	58.4712	1350.02	38.5953	1381.78	33.3883	1381.78	33.3883	96.2561
-Spot 8	205.47	33841.4	3.82289	11.2692	1.51426	3.01922	2.88291	0.246767	2.45319	0.850945	1421.78	31.3008	1412.49	21.9928	1398.47	29.0275	1398.47	29.0275	101.667
-Spot 14	72.1281	69407.1	1.1833	11.2393	2.25942	2.96567	4.52326	0.241747	3.91853	0.866307	1395.77	49.1789	1398.87	34.36	1403.57	43.2861	1403.57	43.2861	99.4446
-Spot 42	223.278	62204.1	2.04454	11.238	2.34172	3.13701	3.7648	0.255683	2.9479	0.783015	1467.72	38.6953	1441.82	28.9948	1403.8	44.8617	1403.8	44.8617	104.553
-Spot 32	128.474	52506.4	2.88189	11.2221	2.08384	2.87363	4.25256	0.233885	3.707	0.871711	1354.83	45.2977	1375.02	32.0433	1406.51	39.9057	1406.51	39.9057	96.3256
-Spot 32	296.964	134800	4.19906	11.1335	1.57433	2.88083	2.57487	0.232621	2.0375	0.791305	1348.22	24.7878	1376.91	19.4102	1421.67	30.0841	1421.67	30.0841	94.8338
-Spot 93	45.7025	36569.1	3.4946	11.0934	2.52502	3.22233	4.77342	0.259258	4.05091	0.848637	1486.04	53.7647	1462.54	37.0058	1428.56	48.2106	1428.56	48.2106	104.023
-Spot 18	126.127	106810	2.19988	11.0814	1.5961	3.15368	3.79831	0.253461	3.44668	0.907425	1456.3	44.929	1445.9	29.2904	1430.62	30.4632	1430.62	30.4632	101.795
-Spot 30	256.083	67433.1	2.8009	11.0413	1.70158	3.03961	3.31408	0.243409	2.8439	0.858126	1404.39	35.8888	1417.62	25.3257	1437.54	32.4463	1437.54	32.4463	97.6942
-Spot 68	326.071	238493	6.34204	10.9432	1.63217	3.29341	3.3839	0.261389	2.96425	0.875987	1496.95	39.5984	1479.5	26.3626	1454.54	31.0513	1454.54	31.0513	102.915
-Spot 51	243.39	123311	2.06106	10.7539	2.2223	3.27082	3.57956	0.255107	2.80618	0.783945	1464.76	36.7689	1474.14	27.8429	1487.65	42.0916	1487.65	42.0916	98.4614
-Spot 3	107.176	154726	4.61447	10.6422	1.92682	3.36134	3.06947	0.259443	2.38935	0.778425	1486.99	31.7296	1495.44	24.0252	1507.41	36.3978	1507.41	36.3978	98.6453
-Spot 81	176.005	26892.9	4.60593	10.4784	1.44172	3.65529	5.26123	0.277789	5.05984	0.961722	1580.22	70.9135	1561.66	41.9701	1536.65	27.1273	1536.65	27.1273	102.836
-Spot 43	404.66	193630	2.9894	10.4617	1.61418	3.63029	2.96888	0.275451	2.49172	0.83928	1568.41	34.6898	1556.19	23.6393	1539.64	30.3609	1539.64	30.3609	101.869
-Spot 16	99.2181	32391.7	2.48092	10.3402	1.82462	3.60106	3.32004	0.270059	2.77371	0.835443	1541.1	38.0206	1549.77	26.3903	1561.59	34.2209	1561.59	34.2209	98.6882
-Spot 75	181.913	38942.2	2.53034	10.1346	2.16534	4.03373	3.46279	0.296491	2.70226	0.780371	1673.89	39.8376	1641.02	28.1828	1599.16	40.4125	1599.16	40.4125	104.673
-Spot 29	167.648	94945.4	5.55837	9.99177	1.51958	3.86238	5.79206	0.279896	5.58917	0.964971	1590.84	78.7969	1605.86	46.7494	1625.6	28.2626	1625.6	28.2626	97.8619
-Spot 53	359.653	94015	3.292	9.96247	1.23389	3.99907	3.74694	0.288951	3.53795	0.944223	1636.29	51.1289	1634.01	30.4443	1631.06	22.9321	1631.06	22.9321	100.321
-Spot 46	68.1675	36526	3.50962	9.87547	1.93212	3.73815	3.28013	0.26774	2.65069	0.808106	1529.32	36.0882	1579.58	26.2824	1647.34	35.835	1647.34	35.835	92.8357
-Spot 70	270.912	67819.6	3.29237	9.84481	2.48772	3.96757	3.67066	0.28329	2.69908	0.735312	1607.91	38.4101	1627.59	29.7769	1653.11	46.1094	1653.11	46.1094	97.2658
-Spot 77	83.3005	28427.3	1.34371	9.78888	1.66214	5.69727	2.53334	0.404482	1.91184	0.75467	2189.64	35.4941	1930.95	21.8857	1663.65	30.7638	1663.65	30.7638	131.616
-Spot 49	112.365	54392.4	3.27863	9.45178	1.75932	4.26229	2.74439	0.292183	2.10629	0.76749	1652.43	30.7023	1686.11	22.5743	1728.25	32.2962	1728.25	32.2962	95.6131
-Spot 8	525.662	62335	3.89805	9.42756	1.89127	4.72642	2.89037	0.323169	2.18571	0.756204	1805.19	34.4136	1771.93	24.2279	1732.95	34.6987	1732.95	34.6987	104.168
-Spot 109	594.263	264529	3.79892	9.29311	1.6294	3.84323	3.75116	0.259034	3.37879	0.900733	1484.9	44.8132	1601.85	30.2333	1759.26	29.7951	1759.26	29.7951	84.4045
-Spot 47	258.824	60335.7	1.3578	8.99166	1.09789	5.03429	4.52436	0.328304	4.38913	0.970111	1830.16	69.9347	1825.11	38.3447	1819.33	19.9276	1819.33	19.9276	100.595
-Spot 17	300.855	67540.2	3.27933	8.98382	1.43011	4.74573	2.57719	0.309217	2.14398	0.831909	1736.85	32.6434	1775.35	21.6172	1820.92	25.9539	1820.92	25.9539	95.3833
-Spot 80	114.115	27261.8	1.12243	8.97128	3.485	4.01884	4.62399	0.261489	3.0391	0.657245	1497.46	40.6106	1638.01	37.6134	1823.45	63.2421	1823.45	63.2421	82.1222
-Spot 165	375.068	55277.9	3.64369	8.49777	1.53535	5.63518	3.06774	0.347305	2.65589	0.865748	1921.72	44.1347	1921.5	26.4608	1921.24	27.5296	1921.24	27.5296	100.025
-Spot 33	75.0649	86002	1.59939	8.21385	2.49459	5.90632	3.44598	0.351854	2.37736	0.689893	1943.45	39.8889	1962.16	29.9322	1981.95	44.4148	1981.95	44.4148	98.0573
-Spot 12	74.6462	34563	1.38374	7.83863	1.92385	6.95777	4.10981	0.395557	3.63171	0.883669	2148.55	66.36	2106.06	36.502	2064.79	33.9247	2064.79	33.9247	104.057
-Spot 78	195.721	55079.7	1.80694	5.90885	1.7456	11.1401	2.87493	0.47741	2.28432	0.794564	2515.98	47.5854	2534.92	26.7933	2550.11	29.242	2550.11	29.242	98.6616
-Spot 43	199.091	115749	3.01408	5.59784	1.78483	11.1773	3.3111	0.453792	2.78886	0.842276	2412.09	56.1191	2538.03	30.8689	2640.28	29.6396	2640.28	29.6396	91.3574
-Spot 96	120.137	64262.8	2.70998	5.40714	2.29073	12.9295	4.2264	0.507046	3.55176	0.840376	2644.01	77.0378	2674.53	39.8538	2697.67	37.8344	2697.67	37.8344	98.0109
-Spot 35	107.083	114260	3.40786	5.40688	1.36072	13.19	3.54161	0.517236	3.26978	0.923246	2687.45	71.8605	2693.34	33.4387	2697.75	22.4725	2697.75	22.4725	99.6182
-Spot 24	348.68	134992	32.5073	4.92397	1.65836	15.455	3.33596	0.551929	2.89455	0.867683	2833.19	66.3631	2843.71	31.8246	2851.16	27.008	2851.16	27.008	99.3697
-Spot 44	141.017	192703	2.04303	4.78292	1.5404	16.429	2.61022	0.569904	2.10723	0.8073	2907.43	49.3137	2902.1	24.9881	2898.39	24.9817	2898.39	24.9817	100.312
Sample SEACAT - Lower Pennsylvanian Kearny Formation
							Isotope ratios						Apparent ages (Ma)
Analysis	U	206Pb	U/Th	206Pb*	±	207Pb*	±	206Pb*	±	error	206Pb*	±	207Pb*	±	206Pb*	±	Best age	±	Conc
	(ppm)	204Pb		207Pb*	(%)	235U*	(%)	238U	(%)	corr.	238U*	(Ma)	235U	(Ma)	207Pb*	(Ma)	(Ma)	(Ma)	(%)
ACHAPMAN-SEACAT-46 <>	172.964	15233	0.579379	23.7556	55.188	0.358997	55.1974	0.0618523	1.01663	0.018418	386.88	3.81743	311.466	149.117	-220.806	1493.36	386.88	3.81743	NA
ACHAPMAN-SEACAT-11 <>	214.2	71937.1	0.731565	18.028	2.71553	0.520016	2.87257	0.0679928	0.936802	0.326119	424.051	3.84468	425.162	9.97893	431.168	60.5446	424.051	3.84468	98.3494
ACHAPMAN-SEACAT-2 <>	83.6023	30035.3	0.862453	18.4925	5.1083	0.521993	5.19014	0.0700099	0.91806	0.176885	436.215	3.87223	426.482	18.0762	374.193	115.035	436.215	3.87223	116.575
ACHAPMAN-SEACAT-16 <>	57.5581	23067.4	0.969474	19.0884	3.69323	0.510006	4.19358	0.0706063	1.98649	0.473699	439.808	8.44538	418.453	14.3827	302.37	84.1961	439.808	8.44538	145.453
ACHAPMAN-SEACAT-65 <>	319.775	105150	1.09044	17.5064	3.77289	0.587471	3.82636	0.0745901	0.637467	0.166599	463.75	2.85243	469.251	14.3789	496.243	83.1842	463.75	2.85243	93.4522
ACHAPMAN-SEACAT-94 <>	281.568	53436.7	2.41482	17.9267	2.33544	0.579456	2.52371	0.0753391	0.956462	0.37899	468.242	4.31978	464.112	9.40145	443.704	51.9376	468.242	4.31978	105.53
ACHAPMAN-SEACAT-68 <>	42.8794	13006.8	1.15466	16.8402	14.6629	0.748121	14.8391	0.0913732	2.28036	0.153672	563.653	12.3074	567.133	64.569	581.094	320.052	563.653	12.3074	96.9986
ACHAPMAN-SEACAT-29 <>	51.3978	31135.7	1.05366	14.6539	4.74383	1.3891	5.18462	0.147634	2.09197	0.403496	887.685	17.3483	884.316	30.6181	875.885	98.2599	887.685	17.3483	101.347
ACHAPMAN-SEACAT-66 <>	47.4877	15593.4	1.79432	14.1805	4.92866	1.53443	6.11739	0.157811	3.62364	0.592351	944.601	31.8395	944.273	37.6237	943.514	101.042	943.514	101.042	100.115
ACHAPMAN-SEACAT-96 <>	75.0488	59444.1	0.40554	14.0027	3.1709	1.6009	3.36305	0.162583	1.12048	0.333175	971.114	10.1012	970.561	21.0216	969.33	64.7149	969.33	64.7149	100.184
ACHAPMAN-SEACAT-20 <>	293.262	279091	0.818135	13.93	0.626195	1.6074	0.740865	0.162395	0.39593	0.534416	970.073	3.56579	973.096	4.63755	979.909	12.7545	979.909	12.7545	98.9962
ACHAPMAN-SEACAT-5 <>	38.6896	39206.1	2.18232	13.8542	3.16269	1.72953	3.36655	0.173783	1.1537	0.342696	1032.92	11.0111	1019.58	21.6631	991.053	64.3472	991.053	64.3472	104.225
ACHAPMAN-SEACAT-61 <>	244.22	74197.5	0.938849	13.7117	1.10229	1.70364	1.32547	0.169421	0.736081	0.555338	1008.92	6.87449	1009.9	8.4808	1011.99	22.3453	1011.99	22.3453	99.6964
ACHAPMAN-SEACAT-59 <>	42.2054	27075.3	2.95039	13.6957	7.50631	1.67866	7.57703	0.166742	1.03284	0.136312	994.137	9.51531	1000.47	48.2504	1014.37	152.311	1014.37	152.311	98.0058
ACHAPMAN-SEACAT-26 <>	71.6726	36462	1.88103	13.6945	1.19524	1.73767	1.58814	0.172588	1.04575	0.658472	1026.35	9.92225	1022.6	10.2358	1014.55	24.2014	1014.55	24.2014	101.163
ACHAPMAN-SEACAT-89 <>	391.847	300461	3.54477	13.6745	0.747088	1.7036	1.05952	0.168957	0.751294	0.709089	1006.36	7.00012	1009.88	6.77908	1017.51	15.133	1017.51	15.133	98.9041
ACHAPMAN-SEACAT-21 <>	143.497	67221	1.83376	13.6644	1.17799	1.73018	1.25061	0.171468	0.419954	0.335798	1020.19	3.96252	1019.82	8.04752	1019	23.8453	1019	23.8453	100.117
ACHAPMAN-SEACAT-58 <>	139.396	73043.9	1.0409	13.6099	2.55317	1.75196	2.70969	0.172933	0.907608	0.334949	1028.25	8.62623	1027.89	17.5176	1027.09	51.6458	1027.09	51.6458	100.113
ACHAPMAN-SEACAT-1 <>	115.598	49116.8	1.52085	13.5916	1.06185	1.68548	1.48298	0.166147	1.03523	0.698076	990.849	9.50816	1003.06	9.45104	1029.81	21.4865	1029.81	21.4865	96.2167
ACHAPMAN-SEACAT-36 <>	232.707	110915	0.891858	13.5581	1.46006	1.73419	1.54801	0.170528	0.514358	0.33227	1015.02	4.83055	1021.31	9.9698	1034.8	29.5153	1034.8	29.5153	98.0888
ACHAPMAN-SEACAT-84 <>	67.7903	25619.5	1.79931	13.5246	4.13631	1.75321	4.21407	0.171971	0.805796	0.191216	1022.96	7.62224	1028.35	27.254	1039.8	83.5489	1039.8	83.5489	98.3811
ACHAPMAN-SEACAT-63 <>	56.6379	31267.5	2.32449	13.5003	5.97926	1.65768	6.29157	0.162308	1.9576	0.311147	969.593	17.6224	992.489	39.8666	1043.43	120.726	1043.43	120.726	92.9238
ACHAPMAN-SEACAT-9 <>	179.809	105977	2.8044	13.4732	1.89651	1.71033	2.34691	0.167128	1.38247	0.589062	996.269	12.7617	1012.41	15.0389	1047.51	38.2583	1047.51	38.2583	95.1085
ACHAPMAN-SEACAT-22 <>	280.135	243586	1.25738	13.4463	0.51176	1.78483	0.777882	0.17406	0.585835	0.753116	1034.44	5.59889	1039.94	5.06227	1051.54	10.3315	1051.54	10.3315	98.3741
ACHAPMAN-SEACAT-55 <>	104.604	95603.5	1.56113	13.4301	2.82844	1.79134	2.86984	0.174483	0.485716	0.169248	1036.76	4.65166	1042.31	18.7026	1053.98	56.9847	1053.98	56.9847	98.367
ACHAPMAN-SEACAT-92 <>	49.8087	22452.7	1.03016	13.3607	5.57112	1.8704	5.68329	0.181243	1.12359	0.197701	1073.76	11.1135	1070.67	37.6202	1064.4	112.146	1064.4	112.146	100.879
ACHAPMAN-SEACAT-88 <>	118.334	60975.1	1.49898	13.3153	2.01867	1.85258	2.1442	0.178908	0.722905	0.337143	1061	7.07211	1064.35	14.1405	1071.23	40.5621	1071.23	40.5621	99.0452
ACHAPMAN-SEACAT-8 <>	93.7913	73229.2	0.890216	13.3087	2.07472	1.86847	2.33197	0.180351	1.06472	0.456576	1068.89	10.4873	1069.99	15.4249	1072.24	41.6822	1072.24	41.6822	99.6881
ACHAPMAN-SEACAT-69 <>	152.706	118422	3.64579	13.3023	2.23426	1.82803	2.35803	0.176364	0.753921	0.319724	1047.08	7.2864	1055.57	15.4779	1073.2	44.8991	1073.2	44.8991	97.5664
ACHAPMAN-SEACAT-23 <>	31.5183	36404.9	1.01552	13.2575	6.64589	1.92706	6.75628	0.185292	1.21632	0.180028	1095.82	12.2573	1090.52	45.1947	1079.93	133.485	1079.93	133.485	101.471
ACHAPMAN-SEACAT-39 <>	292.199	165312	5.14162	13.2082	1.38195	1.83581	3.40491	0.175861	3.11185	0.913931	1044.32	30.0023	1058.36	22.385	1087.41	27.6802	1087.41	27.6802	96.0377
ACHAPMAN-SEACAT-91 <>	76.8508	88423	1.73468	13.129	1.78262	2.01673	1.92337	0.192034	0.722222	0.375499	1132.39	7.50031	1121.16	13.0565	1099.46	35.6481	1099.46	35.6481	102.994
ACHAPMAN-SEACAT-57 <>	141.633	86340.1	2.09284	13.0701	1.83297	1.91966	2.07109	0.18197	0.964163	0.465535	1077.73	9.56892	1087.95	13.8276	1108.44	36.6248	1108.44	36.6248	97.2291
ACHAPMAN-SEACAT-86 <>	81.5079	96296.8	1.6503	13.0589	3.53521	1.92829	3.70801	0.182632	1.11876	0.301715	1081.34	11.1374	1090.95	24.798	1110.16	70.6544	1110.16	70.6544	97.4036
ACHAPMAN-SEACAT-77 <>	65.8126	41937.3	1.20958	13.0294	4.74808	2.08384	5.23855	0.196919	2.21318	0.422479	1158.75	23.4725	1143.5	35.9579	1114.67	94.8444	1114.67	94.8444	103.955
ACHAPMAN-SEACAT-13 <>	51.3945	43888.6	1.33896	12.9621	3.08693	2.07062	3.78911	0.19466	2.19733	0.579905	1146.57	23.0806	1139.14	25.95	1125.01	61.5394	1125.01	61.5394	101.917
ACHAPMAN-SEACAT-76 <>	142.035	64369.5	2.34993	12.9546	1.53898	1.99801	1.70061	0.187724	0.723625	0.425509	1109.03	7.37286	1114.84	11.5085	1126.19	30.6513	1126.19	30.6513	98.4768
ACHAPMAN-SEACAT-74 <>	36.5139	20711.8	1.02293	12.944	5.34881	2.14548	5.48653	0.201415	1.22158	0.22265	1182.92	13.202	1163.59	38.0162	1127.81	106.655	1127.81	106.655	104.886
ACHAPMAN-SEACAT-83 <>	33.3027	22525.5	2.08936	12.9435	8.15988	2.05684	8.36363	0.193087	1.83488	0.219388	1138.07	19.1429	1134.57	57.2021	1127.9	162.814	1127.9	162.814	100.903
ACHAPMAN-SEACAT-98 <>	99.4991	45648.7	1.43325	12.9318	2.39657	2.08661	2.61726	0.195704	1.05191	0.401914	1152.2	11.0988	1144.41	17.9672	1129.66	47.754	1129.66	47.754	101.996
ACHAPMAN-SEACAT-87 <>	350.888	173415	1.62528	12.8915	0.829318	2.03142	1.59659	0.189933	1.36431	0.854513	1121.01	14.0381	1126.09	10.8641	1135.88	16.484	1135.88	16.484	98.6912
ACHAPMAN-SEACAT-35 <>	31.8838	13310.2	2.27578	12.8637	4.29412	1.87628	4.43897	0.17505	1.1247	0.25337	1039.88	10.8009	1072.75	29.4103	1140.21	85.4144	1140.21	85.4144	91.2002
ACHAPMAN-SEACAT-12 <>	110.335	49065.7	2.63097	12.8013	1.28837	2.08539	1.54388	0.193615	0.850692	0.551009	1140.93	8.89541	1144.01	10.5959	1149.84	25.5859	1149.84	25.5859	99.2252
ACHAPMAN-SEACAT-28 <>	49.8182	18055.1	1.05274	12.7722	3.89157	1.83757	4.07814	0.17022	1.21936	0.299	1013.32	11.4339	1058.99	26.8219	1154.34	77.266	1154.34	77.266	87.7833
ACHAPMAN-SEACAT-93 <>	243.696	160459	2.06891	12.7718	0.622244	2.13056	0.827491	0.197353	0.545485	0.659204	1161.09	5.79593	1158.77	5.71833	1154.42	12.3393	1154.42	12.3393	100.578
ACHAPMAN-SEACAT-62 <>	218.152	128045	2.04487	12.7606	0.90359	2.13159	1.64507	0.197276	1.3747	0.835645	1160.67	14.6018	1159.1	11.3703	1156.15	17.9267	1156.15	17.9267	100.391
ACHAPMAN-SEACAT-7 <>	56.0462	33845.4	0.710652	12.6727	2.31499	2.1942	2.6511	0.201671	1.29196	0.487329	1184.29	13.9774	1179.2	18.4935	1169.85	45.8424	1169.85	45.8424	101.235
ACHAPMAN-SEACAT-37 <>	122.03	81485.9	3.04827	12.6125	2.08027	2.21693	2.20946	0.202792	0.744434	0.336931	1190.3	8.09106	1186.4	15.4618	1179.31	41.1206	1179.31	41.1206	100.932
ACHAPMAN-SEACAT-32 <>	40.1884	35680.7	1.99836	12.5016	3.69018	2.22346	4.11365	0.201602	1.81788	0.441914	1183.92	19.6616	1188.46	28.8192	1196.71	72.8037	1196.71	72.8037	98.9312
ACHAPMAN-SEACAT-70 <>	90.3577	79764.3	3.85795	12.1102	2.36654	2.28997	2.8137	0.201132	1.52196	0.540913	1181.4	16.4291	1209.2	19.8884	1259.2	46.2641	1259.2	46.2641	93.8211
ACHAPMAN-SEACAT-53 <>	43.9529	25956.8	1.03169	12.0185	9.91763	2.42055	9.93537	0.21099	0.593427	0.0597287	1234.09	6.6651	1248.72	71.5071	1274.04	193.907	1274.04	193.907	96.864
ACHAPMAN-SEACAT-71 <>	44.7816	39291.5	1.17121	11.6885	3.30027	2.78892	3.43991	0.236425	0.970145	0.282026	1368.09	11.9586	1352.57	25.7152	1328.11	63.882	1328.11	63.882	103.01
ACHAPMAN-SEACAT-90 <>	53.8393	52201.2	1.34535	11.6614	1.97832	2.84205	2.51129	0.240369	1.54687	0.615967	1388.62	19.3242	1366.71	18.8645	1332.61	38.2749	1332.61	38.2749	104.203
ACHAPMAN-SEACAT-42 <>	93.9056	62092.3	0.806895	11.6315	4.34538	2.82988	4.35749	0.238728	0.324673	0.0745092	1380.08	4.03359	1363.49	32.7039	1337.57	84.0406	1337.57	84.0406	103.178
ACHAPMAN-SEACAT-24 <>	123.526	111158	3.88474	11.5981	1.37741	2.78771	1.42218	0.234496	0.353992	0.248909	1358.02	4.33468	1352.25	10.6284	1343.11	26.6091	1343.11	26.6091	101.11
ACHAPMAN-SEACAT-81 <>	352.535	157870	1.55743	11.4416	0.50907	2.84378	0.630428	0.235982	0.371869	0.589868	1365.78	4.57694	1367.17	4.73594	1369.33	9.79839	1369.33	9.79839	99.7406
ACHAPMAN-SEACAT-18 <>	283.035	198204	46.8105	11.3793	0.394657	2.76414	0.76136	0.228125	0.651087	0.855163	1324.67	7.7963	1345.91	5.677	1379.82	7.58424	1379.82	7.58424	96.0026
ACHAPMAN-SEACAT-47 <>	75.7492	80241.2	1.00857	11.3023	4.35245	2.56956	4.45047	0.210632	0.928915	0.208723	1232.19	10.4186	1292.02	32.5408	1392.85	83.5351	1392.85	83.5351	88.465
ACHAPMAN-SEACAT-73 <>	163.759	192650	2.13925	11.0818	1.86441	3.1343	2.70519	0.251911	1.96011	0.724574	1448.32	25.4258	1441.15	20.827	1430.56	35.5853	1430.56	35.5853	101.242
ACHAPMAN-SEACAT-34 <>	111.766	109195	1.11965	10.8063	1.23016	3.20403	1.30421	0.251115	0.433208	0.332162	1444.22	5.60518	1458.13	10.093	1478.44	23.3275	1478.44	23.3275	97.6854
ACHAPMAN-SEACAT-82 <>	217.702	263753	2.50764	10.7371	0.768017	3.44239	1.05172	0.268068	0.718514	0.683181	1530.99	9.79167	1514.13	8.27528	1490.62	14.5399	1490.62	14.5399	102.708
ACHAPMAN-SEACAT-31 <>	198.187	112229	1.23377	10.7147	0.733198	3.31518	1.54654	0.257624	1.3617	0.880477	1477.67	17.9819	1484.63	12.0648	1494.57	13.8733	1494.57	13.8733	98.8693
ACHAPMAN-SEACAT-14 <>	75.3321	101887	1.37172	10.6996	0.818896	3.3466	1.02827	0.259698	0.621891	0.604793	1488.3	8.26485	1492	8.03897	1497.24	15.4894	1497.24	15.4894	99.4028
ACHAPMAN-SEACAT-25 <>	70.2623	118018	0.99586	10.629	0.778559	3.45082	1.44018	0.266019	1.2116	0.841281	1520.56	16.4116	1516.06	11.3383	1509.75	14.7004	1509.75	14.7004	100.716
ACHAPMAN-SEACAT-95 <>	71.9023	72385.6	1.34524	10.4578	0.717342	3.53485	0.963334	0.268109	0.642987	0.667461	1531.2	8.76347	1535.05	7.6247	1540.34	13.4911	1540.34	13.4911	99.4066
ACHAPMAN-SEACAT-3 <>	27.2436	106508	1.84807	10.0787	1.98204	3.91039	2.32992	0.285841	1.22477	0.525672	1620.71	17.5514	1615.83	18.8419	1609.47	36.941	1609.47	36.941	100.698
ACHAPMAN-SEACAT-43 <>	180.577	164493	0.657131	10.0087	2.33314	3.91192	2.6013	0.283966	1.1503	0.442202	1611.31	16.3999	1616.15	21.0388	1622.45	43.4141	1622.45	43.4141	99.3131
ACHAPMAN-SEACAT-60 <>	54.3691	34128.2	0.756309	9.79904	0.905628	3.96791	1.14554	0.281997	0.701502	0.612375	1601.41	9.94728	1627.66	9.29055	1661.74	16.7644	1661.74	16.7644	96.3696
ACHAPMAN-SEACAT-79 <>	57.1566	42962.2	0.797299	9.59153	1.07713	4.38623	1.20866	0.305125	0.548322	0.453661	1716.67	8.26381	1709.75	9.99436	1701.26	19.8397	1701.26	19.8397	100.906
ACHAPMAN-SEACAT-10 <>	52.7383	79357.1	3.27639	9.38757	1.54823	4.63993	2.30309	0.31591	1.70505	0.740333	1769.72	26.3873	1756.48	19.2411	1740.75	28.3776	1740.75	28.3776	101.664
ACHAPMAN-SEACAT-30 <>	244.675	392216	3.45881	9.29702	0.309636	4.6258	0.744007	0.31191	0.676515	0.909285	1750.1	10.3686	1753.94	6.21176	1758.49	5.66282	1758.49	5.66282	99.5227
ACHAPMAN-SEACAT-51 <>	131.397	132327	0.912871	9.11256	1.56579	4.78826	1.62957	0.316458	0.451415	0.277016	1772.41	6.99526	1782.84	13.6886	1795.06	28.5051	1795.06	28.5051	98.7383
ACHAPMAN-SEACAT-75 <>	83.313	109022	0.494876	8.98839	1.39744	4.96135	1.45576	0.32343	0.40794	0.280224	1806.46	6.4268	1812.76	12.3026	1819.99	25.3637	1819.99	25.3637	99.2564
ACHAPMAN-SEACAT-97 <>	115.837	170681	4.36948	8.90287	0.67396	5.05233	1.144	0.326227	0.924403	0.808042	1820.07	14.6583	1828.14	9.69705	1837.33	12.2071	1837.33	12.2071	99.0607
ACHAPMAN-SEACAT-33 <>	91.2673	112714	3.69431	8.85423	0.706673	5.16492	1.96322	0.331675	1.83162	0.932969	1846.5	29.4084	1846.85	16.7022	1847.24	12.7823	1847.24	12.7823	99.9596
ACHAPMAN-SEACAT-52 <>	183.282	277922	2.47197	8.82307	0.797517	5.15366	0.862667	0.329788	0.328878	0.381234	1837.35	5.25782	1845	7.33606	1853.62	14.4147	1853.62	14.4147	99.1225
ACHAPMAN-SEACAT-38 <>	146.446	156489	1.36708	8.80983	1.01064	5.17383	1.16636	0.330582	0.582239	0.499192	1841.2	9.32517	1848.32	9.9251	1856.33	18.2615	1856.33	18.2615	99.185
ACHAPMAN-SEACAT-72 <>	86.6372	150373	1.77134	8.8066	0.765201	5.20258	0.918459	0.332297	0.507971	0.553069	1849.5	8.16738	1853.04	7.82248	1856.99	13.8248	1856.99	13.8248	99.5968
ACHAPMAN-SEACAT-64 <>	107.817	121017	3.3638	8.76698	1.06382	5.32042	1.3974	0.338294	0.906101	0.648418	1878.46	14.7652	1872.15	11.9446	1865.14	19.2021	1865.14	19.2021	100.714
ACHAPMAN-SEACAT-99 <>	69.8458	70894.1	15.7597	8.50026	0.962545	5.61789	1.17699	0.346341	0.677357	0.575499	1917.1	11.2327	1918.85	10.1454	1920.72	17.2586	1920.72	17.2586	99.8119
ACHAPMAN-SEACAT-44 <>	44.9802	94376.4	1.20001	5.61044	4.02278	12.4204	4.05285	0.505396	0.492805	0.121595	2636.94	10.6653	2636.72	38.1034	2636.54	66.8491	2636.54	66.8491	100.015
ACHAPMAN-SEACAT-27 <>	41.3498	50959.7	2.17953	5.26503	4.22258	13.2348	5.25383	0.505378	3.12612	0.595016	2636.87	67.6565	2696.54	49.6384	2741.56	69.4842	2741.56	69.4842	96.1811
ACHAPMAN-SEACAT-17 <>	84.9809	148754	0.78979	5.13694	0.220002	14.6208	0.486041	0.544722	0.433399	0.891693	2803.19	9.85216	2790.89	4.61927	2782	3.60198	2782	3.60198	100.762
Sample 10DM14 - Lower Pennsylvanian Amsden Formation
							Isotope ratios						Apparent ages (Ma)
Analysis	U	206Pb	U/Th	206Pb*	±	207Pb*	±	206Pb*	±	error	206Pb*	±	207Pb*	±	206Pb*	±	Best age	±	Conc
	(ppm)	204Pb		207Pb*	(%)	235U*	(%)	238U	(%)	corr.	238U*	(Ma)	235U	(Ma)	207Pb*	(Ma)	(Ma)	(Ma)	(%)
10DM14-1	435.718	243233	0.817135	5.3062	0.264965	12.6461	7.49628	0.486674	7.4916	0.999375	2556.27	158.126	2653.65	70.6519	2728.75	4.36366	2728.75	4.36366	93.6792
10DM14-2	306.575	16837.6	3.31225	18.0696	3.43955	0.50464	3.70097	0.0661346	1.36628	0.369167	412.826	5.46354	414.839	12.6043	426.029	76.7406	412.826	5.46354	NA
10DM14-3	38.0715	16250.2	1.11641	9.12313	2.85069	4.94909	3.42641	0.327467	1.90102	0.554813	1826.09	30.231	1810.67	28.9509	1792.95	51.9189	1792.95	51.9189	101.849
10DM14-5	511.036	184122	1.48343	17.0728	1.25282	0.694667	2.57773	0.0860163	2.25281	0.873951	531.934	11.5024	535.6	10.7294	551.239	27.3673	531.934	11.5024	96.498
10DM14-7	288.669	36221.9	17.3979	15.4883	2.71458	0.778319	5.62994	0.0874301	4.93227	0.876078	540.321	25.5639	584.524	25.0247	760.163	57.2742	540.321	25.5639	71.0796
10DM14-8	435.408	131236	5.1386	16.157	1.17004	0.847581	2.3514	0.099321	2.03963	0.867411	610.428	11.8792	623.32	10.9534	670.392	25.0172	610.428	11.8792	91.0554
10DM14-9	331.777	24285.3	1.57025	18.345	2.34286	0.425749	2.93839	0.0566462	1.77346	0.603548	355.197	6.12887	360.154	8.90966	392.188	52.5508	355.197	6.12887	NA
10DM14-10	246.68	45574.1	0.930031	9.99105	0.8962	3.2926	3.8232	0.238588	3.71668	0.972138	1379.35	46.1533	1479.3	29.7852	1625.73	16.6667	1625.73	16.6667	84.8452
10DM14-11	312.49	119705	3.15734	12.0159	0.985786	2.41172	3.30138	0.210176	3.15077	0.954379	1229.75	35.2755	1246.09	23.7005	1274.47	19.2282	1274.47	19.2282	96.4916
10DM14-13	302.157	100638	1.13201	9.57495	0.857652	4.25359	2.49096	0.295387	2.33866	0.938858	1668.39	34.3781	1684.43	20.4812	1704.44	15.7903	1704.44	15.7903	97.885
10DM14-14	211.299	101492	1.01353	10.3155	0.669774	3.40843	2.13184	0.255003	2.0239	0.949365	1464.22	26.51	1506.34	16.7377	1566.06	12.5523	1566.06	12.5523	93.4971
10DM14-15	93.3442	53583	1.23612	9.88023	0.708086	3.92138	2.04275	0.280999	1.9161	0.938	1596.39	27.0953	1618.1	16.5285	1646.45	13.1345	1646.45	13.1345	96.9597
10DM14-16	290.559	153917	2.00671	5.66341	0.312479	12.0414	1.03972	0.494599	0.991649	0.953769	2590.54	21.1547	2607.63	9.7479	2620.92	5.19885	2620.92	5.19885	98.8409
10DM14-17	339.851	32731.5	1.56323	10.5974	1.17247	2.66249	2.78473	0.204637	2.52588	0.907044	1200.18	27.6606	1318.11	20.5582	1515.37	22.1227	1515.37	22.1227	79.2007
10DM14-18	209.266	115493	2.80285	10.6142	1.17496	3.06981	2.3873	0.236317	2.07814	0.870499	1367.52	25.6072	1425.19	18.2861	1512.39	22.1785	1512.39	22.1785	90.4216
10DM14-20	314.336	130047	2.05334	12.1321	0.442736	2.19992	1.5147	0.193572	1.44855	0.956329	1140.7	15.1442	1181.02	10.574	1255.67	8.6576	1255.67	8.6576	90.8434
10DM14-21	299.983	182936	2.21052	7.90319	0.653561	5.88158	2.2698	0.337128	2.17367	0.957649	1872.84	35.3295	1958.52	19.7005	2050.31	11.5443	2050.31	11.5443	91.3441
10DM14-22	113.468	37439.9	2.43319	9.20329	1.2483	4.63949	1.5435	0.309679	0.907816	0.588155	1739.13	13.8377	1756.4	12.8941	1777	22.7765	1777	22.7765	97.8686
10DM14-23	104.066	30866.8	3.92331	10.6873	1.41436	3.21742	1.76658	0.249388	1.05849	0.599173	1435.32	13.6202	1461.36	13.6852	1499.41	26.7443	1499.41	26.7443	95.7256
10DM14-24	225.333	162196	2.03221	4.52545	0.286135	18.3196	4.38831	0.601279	4.37897	0.997872	3034.99	106.008	3006.67	42.2762	2987.78	4.60096	2987.78	4.60096	101.58
10DM14-25	605.245	176809	1.6651	13.3252	0.52525	1.80873	1.12649	0.174803	0.996539	0.884642	1038.52	9.55865	1048.62	7.36595	1069.74	10.5554	1069.74	10.5554	97.0815
10DM14-27	448.515	24923.7	2.39795	16.6973	1.94258	0.67196	3.36478	0.0813748	2.74739	0.816513	504.323	13.3276	521.904	13.7319	599.605	42.068	504.323	13.3276	84.1093
10DM14-28	500.476	255254	3.36641	9.9401	0.568203	3.87913	1.05981	0.279656	0.894618	0.844131	1589.63	12.6034	1609.35	8.55579	1635.23	10.5549	1635.23	10.5549	97.2111
10DM14-29	158.886	36417.1	1.28044	9.72277	0.967099	4.064	3.00542	0.286578	2.84557	0.946813	1624.4	40.8601	1647.11	24.4951	1676.19	17.8696	1676.19	17.8696	96.9107
10DM14-30	322.936	212944	5.26477	8.36843	0.890385	4.85239	3.3417	0.294509	3.2209	0.96385	1664.02	47.2385	1794.03	28.1404	1948.7	15.9118	1948.7	15.9118	85.3916
10DM14-33	492.227	223462	1.54066	6.46231	0.426806	9.18069	3.50827	0.430291	3.48221	0.992572	2307.03	67.5346	2356.19	32.1341	2399	7.25926	2399	7.25926	96.1662
10DM14-34	232.585	122680	2.71995	11.5899	0.419624	2.76101	2.09794	0.232083	2.05554	0.979792	1345.41	24.9604	1345.06	15.6394	1344.5	8.10431	1344.5	8.10431	100.068
10DM14-35	244.268	40644	0.809376	13.4737	0.888943	1.79271	1.75761	0.175185	1.51623	0.862669	1040.62	14.5706	1042.81	11.4566	1047.43	17.9431	1047.43	17.9431	99.3493
10DM14-36	368.208	14678.6	3.91629	17.3275	3.40503	0.514674	4.04843	0.0646794	2.18988	0.54092	404.021	8.57601	421.587	13.9687	518.819	74.7806	404.021	8.57601	NA
10DM14-38	169.049	98332.9	1.52575	11.5531	1.45339	2.40319	2.50277	0.201365	2.03752	0.814108	1182.65	22.0156	1243.55	17.9472	1350.63	28.0467	1350.63	28.0467	87.5625
10DM14-39	126.76	69855	1.1678	9.88274	1.28576	3.92865	1.65902	0.281591	1.0484	0.631941	1599.37	14.8496	1619.6	13.4283	1645.98	23.8505	1645.98	23.8505	97.1685
10DM14-40	383.905	145466	2.47021	9.79194	0.568408	3.87843	1.66307	0.275438	1.56291	0.939779	1568.34	21.758	1609.2	13.4258	1663.08	10.5194	1663.08	10.5194	94.3039
10DM14-41	426.776	63042.9	1.45689	17.2616	1.6248	0.56842	3.51379	0.0711619	3.11556	0.886667	443.152	13.3428	456.992	12.9311	527.221	35.5956	443.152	13.3428	NA
10DM14-42	377.135	67730	1.138	10.6471	0.7045	3.29065	2.20518	0.254104	2.08961	0.947594	1459.6	27.2938	1478.84	17.1741	1506.54	13.3075	1506.54	13.3075	96.8844
10DM14-44	61.0909	75222.7	1.32889	5.43455	0.854605	12.5089	3.45294	0.493041	3.34551	0.968888	2583.82	71.2213	2643.4	32.4763	2689.31	14.1235	2689.31	14.1235	96.0772
10DM14-45	327.705	257352	3.02175	8.72032	0.604114	4.87911	1.96528	0.308583	1.87012	0.951582	1733.73	28.429	1798.66	16.5623	1874.76	10.8926	1874.76	10.8926	92.4773
10DM14-46	96.7987	115493	1.08034	4.90723	0.5135	13.1808	6.80135	0.469112	6.78193	0.997146	2479.66	139.624	2692.68	64.2755	2856.71	8.35928	2856.71	8.35928	86.8015
10DM14-49	210.318	123040	1.50623	10.6295	1.02068	3.35935	2.82078	0.25898	2.62964	0.932238	1484.62	34.871	1494.97	22.075	1509.66	19.2729	1509.66	19.2729	98.341
10DM14-50	226.057	4954.36	0.851948	18.0352	6.56379	0.420932	7.3292	0.0550595	3.26097	0.444928	345.509	10.9704	356.717	22.0492	430.274	146.444	345.509	10.9704	NA
10DM14-51	204.036	92773.2	1.52613	10.5101	0.793016	3.12725	1.6759	0.238379	1.4764	0.880961	1378.27	18.3205	1439.42	12.8944	1530.96	14.9313	1530.96	14.9313	90.0261
10DM14-52	420.896	46460	1.51021	12.561	0.645052	2.02899	1.76028	0.184842	1.63784	0.930439	1093.37	16.4714	1125.28	11.9733	1187.41	12.7208	1187.41	12.7208	92.0808
10DM14-53	135.585	40468.1	6.7183	8.45544	0.710153	5.59514	1.09043	0.34312	0.827481	0.758856	1901.66	13.6272	1915.35	9.39351	1930.19	12.7183	1930.19	12.7183	98.522
10DM14-54	10.9886	1227	1.83031	16.7121	65.2274	0.732346	66.7845	0.0887659	14.3371	0.214677	548.235	75.3548	557.929	294.677	597.702	1596.31	548.235	75.3548	91.7238
10DM14-55	525.716	281520	1.91817	12.3581	0.559252	2.26224	1.12132	0.202763	0.971899	0.866748	1190.15	10.5621	1200.6	7.89568	1219.46	10.9936	1219.46	10.9936	97.5962
10DM14-56	382.988	12210.9	1.18492	17.115	2.64136	0.630709	5.26633	0.07829	4.55603	0.865124	485.908	21.3244	496.538	20.6848	545.846	57.7091	485.908	21.3244	89.0191
10DM14-61	240.377	152587	2.5408	6.57318	0.26131	9.49956	1.93809	0.452874	1.9204	0.990869	2408.02	38.589	2387.5	17.8066	2370.03	4.45769	2370.03	4.45769	101.603
10DM14-62	589.883	168898	1.9649	7.36008	0.277755	7.33508	1.26974	0.391549	1.23899	0.975781	2130.01	22.4737	2153.09	11.3464	2175.17	4.83789	2175.17	4.83789	97.9238
10DM14-63	225.959	220249	0.734953	6.67049	0.348547	8.68828	4.66529	0.42033	4.65225	0.997205	2261.98	88.7585	2305.85	42.5059	2344.93	5.95889	2344.93	5.95889	96.4626
10DM14-64	402.361	64102.3	2.33839	10.4201	0.603365	2.97054	1.98147	0.224495	1.88737	0.952511	1305.58	22.3062	1400.11	15.0534	1547.13	11.3374	1547.13	11.3374	84.3873
10DM14-65	221.409	29786.2	1.70439	11.0731	2.19548	2.9449	9.52982	0.236503	9.27348	0.973101	1368.49	114.353	1393.54	72.3575	1432.06	41.8972	1432.06	41.8972	95.5609
10DM14-67	459.404	158010	2.68257	8.43858	0.226366	5.67542	0.892898	0.347349	0.863727	0.96733	1921.93	14.3543	1927.64	7.70831	1933.76	4.05294	1933.76	4.05294	99.3879
10DM14-68	454.788	93786.6	3.30528	17.4838	2.45154	0.525991	3.36153	0.0666981	2.29997	0.684204	416.232	9.27072	429.145	11.7656	499.064	54.0049	416.232	9.27072	NA
10DM14-69	401.11	19259.2	2.80335	11.0462	3.62433	2.34581	4.80415	0.187934	3.15342	0.656396	1110.18	32.1601	1226.29	34.2139	1436.69	69.1352	1436.69	69.1352	77.2733
10DM14-70	328.421	59879.8	1.27321	8.5629	0.410361	4.72495	2.55731	0.293438	2.52417	0.987041	1658.69	36.9158	1771.67	21.434	1907.54	7.37009	1907.54	7.37009	86.9542
10DM14-71	257.746	221170	2.70178	5.10544	0.20209	15.0487	5.43053	0.557227	5.42677	0.999307	2855.16	125.197	2818.33	51.7497	2792.07	3.30906	2792.07	3.30906	102.26
10DM14-73	432.652	123846	1.65755	8.39921	0.409418	5.49203	1.59324	0.334557	1.53974	0.966419	1860.43	24.8828	1899.35	13.6864	1942.13	7.3231	1942.13	7.3231	95.7933
10DM14-74	182.47	83030.8	1.51975	9.9786	1.00645	3.82762	1.7465	0.277011	1.42734	0.817261	1576.29	19.9595	1598.57	14.0612	1628.05	18.7118	1628.05	18.7118	96.8208
10DM14-75	313.032	89375.3	3.75485	9.16645	0.401213	4.66009	1.31889	0.309809	1.25638	0.952607	1739.77	19.157	1760.1	11.0262	1784.32	7.31243	1784.32	7.31243	97.5033
10DM14-76	403.813	169746	4.76751	13.8641	0.848842	1.53468	1.70322	0.154315	1.47662	0.866961	925.105	12.7254	944.374	10.4715	989.557	17.2659	989.557	17.2659	93.4867
10DM14-78	847.676	132424	7.8108	5.5762	1.56466	10.4346	2.40553	0.421999	1.82713	0.759554	2269.55	34.9546	2474.12	22.2928	2646.7	25.9665	2646.7	25.9665	85.75
10DM14-79	240.117	35134.5	1.5432	9.7904	0.814378	3.7961	1.71442	0.269548	1.50865	0.879977	1538.51	20.6488	1591.92	13.7792	1663.37	15.0719	1663.37	15.0719	92.4937
10DM14-80	260.906	135720	2.90284	8.85417	0.547574	4.83742	2.29877	0.310642	2.2326	0.971215	1743.87	34.1123	1791.43	19.3451	1847.26	9.90401	1847.26	9.90401	94.4031
10DM14-81	492.914	897217	1.79238	5.45066	0.29353	11.9054	2.50531	0.470642	2.48805	0.993113	2486.38	51.33	2596.99	23.4715	2684.43	4.85085	2684.43	4.85085	92.6223
10DM14-82	179.246	71449.7	1.60879	9.93505	0.706076	4.01846	2.37406	0.289553	2.26663	0.954749	1639.3	32.8089	1637.94	19.3047	1636.18	13.1145	1636.18	13.1145	100.191
10DM14-83	500.246	147010	2.39481	10.9102	0.359212	3.17812	1.685	0.251479	1.64627	0.977013	1446.1	21.3254	1451.86	13.015	1460.28	6.82814	1460.28	6.82814	99.0292
10DM14-84	321.672	263659	3.12351	5.94447	0.28717	10.9294	1.59029	0.471202	1.56414	0.983561	2488.83	32.2948	2517.14	14.795	2540.03	4.81541	2540.03	4.81541	97.984
10DM14-85	323.31	103363	1.86695	9.05861	0.280349	4.67357	1.13605	0.30705	1.10091	0.969073	1726.17	16.6721	1762.52	9.50237	1805.86	5.09729	1805.86	5.09729	95.5873
10DM14-89	207.961	40154.2	3.08028	12.1609	0.981759	2.51467	4.24188	0.221793	4.1267	0.972848	1291.34	48.2924	1276.28	30.8261	1251.03	19.1944	1251.03	19.1944	103.222
10DM14-90	323.389	79560	0.914702	4.53738	0.294408	14.1931	5.28416	0.467068	5.27595	0.998447	2470.69	108.29	2762.69	50.1637	2983.54	4.73564	2983.54	4.73564	82.8107
10DM14-91	496.869	88812.2	1.0754	17.8944	1.38904	0.533673	1.69271	0.0692613	0.967397	0.571507	431.704	4.03952	434.245	5.98082	447.723	30.8663	431.704	4.03952	NA
10DM14-92	387.257	115545	1.96157	9.6556	0.334126	4.33648	1.37843	0.30368	1.33732	0.970177	1709.53	20.0816	1700.33	11.374	1688.99	6.16422	1688.99	6.16422	101.216
10DM14-93	281.641	295436	1.30456	5.10367	0.352005	15.23	3.39379	0.563743	3.37548	0.994606	2882.08	78.4497	2829.73	32.3477	2792.64	5.76352	2792.64	5.76352	103.203
10DM14-94	374.89	230228	1.7256	7.96408	0.362409	6.61287	1.72228	0.381966	1.68372	0.97761	2085.46	29.9999	2061.07	15.1918	2036.75	6.4092	2036.75	6.4092	102.392
10DM14-95	211.164	49988.1	1.1364	10.8156	1.21183	3.31329	3.51982	0.259901	3.30463	0.938864	1489.34	43.946	1484.19	27.4604	1476.82	22.985	1476.82	22.985	100.848
10DM14-97	862.226	114463	2.37452	13.5641	0.726606	1.74859	2.48945	0.172019	2.38105	0.956457	1023.23	22.5284	1026.64	16.0823	1033.91	14.6994	1033.91	14.6994	98.9667
10DM14-98	491.212	412490	1.37462	9.78361	0.399367	3.98975	2.2593	0.283103	2.22372	0.984253	1606.97	31.6289	1632.11	18.345	1664.65	7.38901	1664.65	7.38901	96.5349
10DM14-100	492.079	153250	2.24932	10.9187	0.754526	3.28117	2.48014	0.259835	2.36258	0.9526	1489	31.4118	1476.6	19.303	1458.8	14.3456	1458.8	14.3456	102.07
Sample 10DM15 - Lower Pennsylvanian Quadrant Formation
							Isotope ratios						Apparent ages (Ma)
Analysis	U	206Pb	U/Th	206Pb*	±	207Pb*	±	206Pb*	±	error	206Pb*	±	207Pb*	±	206Pb*	±	Best age	±	Conc
	(ppm)	204Pb		207Pb*	(%)	235U*	(%)	238U	(%)	corr.	238U*	(Ma)	235U	(Ma)	207Pb*	(Ma)	(Ma)	(Ma)	(%)
10DM15-4	207.25	12437.1	10.7418	16.6185	7.1521	0.681498	8.29816	0.08214	4.20796	0.507095	508.884	20.5903	527.679	34.162	609.814	154.761	508.884	20.5903	83.4491
10DM15-5	220.994	28473.8	3.19442	13.1421	2.07266	2.03738	2.37172	0.194194	1.15288	0.486094	1144.06	12.0855	1128.09	16.1549	1097.48	41.4734	1097.48	41.4734	104.244
10DM15-8	179.35	25806.9	2.36968	10.7117	2.01453	3.29136	2.53323	0.255702	1.53588	0.606295	1467.82	20.1616	1479.01	19.7306	1495.09	38.1174	1495.09	38.1174	98.1755
10DM15-10	225.018	11761	1.54884	5.24524	0.41342	12.861	1.10573	0.489259	1.02553	0.927473	2567.47	21.7189	2669.52	10.4177	2747.76	6.7969	2747.76	6.7969	93.4389
10DM15-11	60.7947	18190.8	3.28086	4.94834	2.12365	14.8028	3.13291	0.531253	2.30331	0.735197	2746.73	51.515	2802.65	29.8066	2843.12	34.6132	2843.12	34.6132	96.6097
10DM15-12	79.8733	15802.3	1.08616	9.80403	3.25922	3.98024	4.25313	0.283017	2.73251	0.642471	1606.54	38.8567	1630.18	34.5275	1660.8	60.3559	1660.8	60.3559	96.7332
10DM15-15	251.749	52924.5	1.26045	12.8515	3.09011	1.76891	3.90086	0.164876	2.38074	0.610311	983.818	21.7225	1034.12	25.3091	1142.06	61.4491	1142.06	61.4491	86.1445
10DM15-16	362.924	18883.4	2.45207	8.16568	1.25113	4.66655	8.41794	0.276368	8.32445	0.988893	1573.04	116.207	1761.26	70.5034	1992.41	22.2458	1992.41	22.2458	78.9516
10DM15-19	127.108	42480.8	0.779379	8.86717	2.20388	5.05881	2.83513	0.325336	1.78349	0.62907	1815.74	28.2227	1829.23	24.0406	1844.6	39.8833	1844.6	39.8833	98.4352
10DM15-20	408.694	224161	2.67692	6.37243	0.846869	8.86147	5.97954	0.409552	5.91926	0.98992	2212.87	110.881	2323.84	54.611	2422.79	14.3661	2422.79	14.3661	91.3356
10DM15-21	402.013	94745.3	2.40485	8.26861	0.3899	5.81443	1.30889	0.348689	1.24946	0.954601	1928.33	20.8243	1948.56	11.3404	1970.11	6.94912	1970.11	6.94912	97.8795
10DM15-22	634.113	152309	1.10793	13.1793	1.16862	1.90853	1.75672	0.182427	1.31164	0.746641	1080.22	13.0451	1084.07	11.7051	1091.8	23.3893	1091.8	23.3893	98.9395
10DM15-24	711.702	64317.1	3.84487	10.6708	0.564383	2.87103	5.23078	0.222194	5.20024	0.994162	1293.46	60.9463	1374.34	39.4117	1502.33	10.668	1502.33	10.668	86.0966
10DM15-25	404.87	79307.4	2.2596	9.40542	0.810653	4.53774	3.15965	0.30954	3.05389	0.966527	1738.44	46.5347	1737.92	26.295	1737.27	14.8634	1737.27	14.8634	100.068
10DM15-26	613.668	436788	4.42906	9.28536	0.612724	4.55232	1.38966	0.30657	1.24729	0.897548	1723.81	18.8661	1740.59	11.5695	1760.79	11.2028	1760.79	11.2028	97.8997
10DM15-27	249.927	47722.3	2.12466	10.5996	1.5888	3.19354	1.97547	0.245506	1.17397	0.594274	1415.26	14.9174	1455.6	15.2765	1514.97	29.9812	1514.97	29.9812	93.4182
10DM15-28	219.945	29973.5	2.90998	13.5531	1.17579	1.79147	2.29391	0.176095	1.96966	0.858647	1045.61	19.0115	1042.36	14.9491	1035.54	23.7705	1035.54	23.7705	100.972
10DM15-29	141.821	20536.4	1.26553	13.414	6.90203	1.55252	8.23514	0.151041	4.49216	0.545487	906.795	37.9998	951.495	50.9017	1056.38	139.118	1056.38	139.118	85.8395
10DM15-30	363.39	82302.3	1.54027	8.32266	0.360935	5.70141	1.69586	0.344147	1.65701	0.977089	1906.59	27.3491	1931.58	14.651	1958.49	6.4414	1958.49	6.4414	97.3498
10DM15-33	210.531	48676.6	4.07966	10.0319	1.16784	3.91103	1.33551	0.284561	0.647863	0.485105	1614.29	9.25171	1615.97	10.7997	1618.14	21.7406	1618.14	21.7406	99.7623
10DM15-34	500.141	27827.8	4.22	18.1089	3.41302	0.523613	3.96382	0.0687703	2.01573	0.508531	428.743	8.36115	427.562	13.8327	421.183	76.2005	428.743	8.36115	NA
10DM15-36	619.271	788404	2.6954	5.92884	0.604733	8.66848	3.09163	0.372745	3.03191	0.980683	2042.3	53.0721	2303.77	28.1523	2544.45	10.1332	2544.45	10.1332	80.2651
10DM15-37	203.948	54809.6	4.22408	12.5096	1.99069	2.15147	3.76607	0.195199	3.19694	0.84888	1149.48	33.6584	1165.53	26.1117	1195.46	39.2913	1195.46	39.2913	96.1536
10DM15-38	386.87	30558.8	3.00198	14.6767	4.65923	1.10985	9.60182	0.118138	8.39562	0.874378	719.84	57.1845	758.103	51.3294	872.672	96.5656	719.84	57.1845	82.4869
10DM15-39	199.424	30180	1.46295	9.0499	1.19285	4.68392	1.62005	0.307434	1.09622	0.676655	1728.07	16.6168	1764.37	13.5565	1807.61	21.6826	1807.61	21.6826	95.5997
10DM15-40	649.477	262310	0.861324	8.72542	0.4101	5.00563	2.17273	0.31677	2.13368	0.982025	1773.94	33.0891	1820.28	18.3901	1873.71	7.39528	1873.71	7.39528	94.6752
10DM15-41	132.916	13021.7	2.46467	15.3532	17.6553	0.561753	20.6955	0.0625524	10.7979	0.521749	391.129	40.9785	452.667	75.7256	778.608	373.936	391.129	40.9785	50.2344
10DM15-42	277.591	63460.3	1.39705	10.0216	1.78991	3.83545	2.60401	0.278774	1.89132	0.72631	1585.18	26.5793	1600.22	20.9756	1620.06	33.3152	1620.06	33.3152	97.8475
10DM15-44	82.3531	31650.6	1.39992	8.28079	2.27755	5.91413	3.07911	0.35519	2.07212	0.672961	1959.34	35.0104	1963.31	26.7491	1967.49	40.6177	1967.49	40.6177	99.5857
10DM15-45	160.24	23532.4	0.795111	13.0178	3.57835	1.93593	3.98593	0.182779	1.75587	0.440516	1082.14	17.4918	1093.59	26.6934	1116.49	71.4317	1116.49	71.4317	96.9237
10DM15-46	263.058	49187.9	1.76805	13.2077	1.30829	1.91024	1.75413	0.182984	1.16848	0.666129	1083.26	11.6513	1084.67	11.6915	1087.49	26.2025	1087.49	26.2025	99.6107
10DM15-47	181.445	36323.2	3.52192	10.9609	1.5884	2.99158	2.58895	0.237818	2.04442	0.789671	1375.34	25.3208	1405.48	19.7044	1451.46	30.231	1451.46	30.231	94.7558
10DM15-48	353.486	53126.3	3.21485	11.8784	4.01693	2.4765	5.86012	0.213351	4.26676	0.728101	1246.65	48.3651	1265.19	42.4116	1296.85	78.1151	1296.85	78.1151	96.1288
10DM15-49	175.16	95764.1	1.89038	8.033	1.27383	6.05863	2.17582	0.352981	1.76396	0.810709	1948.82	29.6667	1984.31	18.9652	2021.49	22.5715	2021.49	22.5715	96.405
10DM15-50	225.802	50862.5	1.95671	9.19357	2.169	4.65247	2.41063	0.310218	1.05195	0.436377	1741.78	16.0559	1758.74	20.1495	1778.93	39.5669	1778.93	39.5669	97.9114
10DM15-51	1075.73	70279.6	2.98843	10.6747	0.451788	3.48305	3.16626	0.269658	3.13387	0.989768	1539.07	42.9073	1523.38	24.9834	1501.65	8.54045	1501.65	8.54045	102.492
10DM15-52	517.134	61622	2.04553	17.6757	5.0384	0.493545	5.41716	0.0632706	1.99001	0.367353	395.485	7.63365	407.323	18.1784	475.013	111.509	395.485	7.63365	NA
10DM15-53	348.643	229448	0.980225	5.16413	0.364919	14.5787	1.37791	0.546026	1.3287	0.964293	2808.62	30.2515	2788.14	13.0937	2773.35	5.9852	2773.35	5.9852	101.272
10DM15-54	87.2779	136657	1.38654	3.68438	0.893124	22.4216	2.68239	0.59914	2.52933	0.942941	3026.37	61.0913	3202.17	26.0794	3314.22	13.9992	3314.22	13.9992	91.3148
10DM15-55	166.718	40933.7	2.79897	8.91004	2.23481	5.14801	2.45567	0.332673	1.01783	0.41448	1851.33	16.379	1844.07	20.8817	1835.87	40.486	1835.87	40.486	100.842
10DM15-56	262.97	13284.2	2.20481	17.5099	8.33158	0.54703	8.75645	0.0694695	2.69447	0.307713	432.959	11.2828	443.049	31.4492	495.817	183.908	432.959	11.2828	NA
10DM15-57	160.074	76128.4	2.47831	11.1818	3.19045	2.69825	4.37433	0.218822	2.99262	0.684133	1275.65	34.6358	1327.98	32.4171	1413.39	61.048	1413.39	61.048	90.2547
10DM15-58	252.791	182804	3.59754	8.57885	0.806781	5.58957	3.01584	0.347781	2.90593	0.963554	1923.99	48.339	1914.49	25.9809	1904.2	14.4938	1904.2	14.4938	101.04
10DM15-59	237	121007	1.36814	9.22403	0.70971	4.43306	1.48361	0.296567	1.30285	0.87816	1674.26	19.2106	1718.54	12.2922	1772.9	12.9548	1772.9	12.9548	94.4367
10DM15-60	59.5787	19448.6	0.883703	9.03727	4.22461	4.78444	5.22064	0.313593	3.06721	0.587517	1758.37	47.2037	1782.17	43.8726	1810.15	76.7993	1810.15	76.7993	97.1393
10DM15-62	702.096	468943	5.98247	4.49627	0.23587	18.2016	1.25301	0.593553	1.2306	0.982122	3003.81	29.5483	3000.45	12.0608	2998.18	3.79287	2998.18	3.79287	100.188
10DM15-63	154.995	60658.7	2.24131	8.18038	0.91341	5.97221	1.69248	0.354329	1.42484	0.841866	1955.24	24.0309	1971.81	14.7214	1989.22	16.2461	1989.22	16.2461	98.2919
10DM15-64	653.742	236921	1.40574	8.79718	0.288404	4.36035	1.40708	0.278204	1.37721	0.978769	1582.31	19.3233	1704.86	11.6224	1858.93	5.20816	1858.93	5.20816	85.1196
10DM15-65	1146.17	81238.5	11.5209	3.24536	0.280417	25.0463	2.53852	0.589529	2.52298	0.99388	2987.51	60.3228	3310.02	24.791	3511.59	4.3312	3511.59	4.3312	85.0759
10DM15-67	259.162	26602.9	3.03625	12.2929	1.83861	2.32474	3.52718	0.207265	3.01007	0.853392	1214.23	33.3136	1219.87	25.0474	1229.88	36.0932	1229.88	36.0932	98.7276
10DM15-68	138.154	21540.3	0.658359	11.8257	1.72992	2.42456	2.32678	0.207951	1.55604	0.668754	1217.89	17.2684	1249.91	16.7283	1305.48	33.584	1305.48	33.584	93.2906
10DM15-73	252.057	46071.9	1.57281	13.2926	3.01784	1.8016	3.28829	0.173687	1.30595	0.397151	1032.39	12.4583	1046.04	21.4742	1074.67	60.6136	1074.67	60.6136	96.0663
10DM15-74	289.035	32714.8	1.33532	13.7036	1.11733	1.7579	2.59324	0.174714	2.34019	0.902418	1038.03	22.4371	1030.08	16.7853	1013.2	22.6269	1013.2	22.6269	102.451
10DM15-75	221.03	67279.7	1.0948	11.29	1.63304	2.9111	4.64511	0.238369	4.34859	0.936165	1378.21	53.9605	1384.8	35.1202	1394.95	31.3211	1394.95	31.3211	98.8004
10DM15-76	522.588	107494	3.03176	13.4306	1.0378	1.87786	1.4488	0.182918	1.01094	0.697777	1082.9	10.0774	1073.31	9.59945	1053.9	20.9234	1053.9	20.9234	102.752
10DM15-77	311.35	15495.4	0.980956	5.37295	0.44715	10.5781	6.0047	0.412212	5.98803	0.997224	2225.03	112.685	2486.79	55.7606	2708.14	7.37838	2708.14	7.37838	82.1607
10DM15-79	192.932	41389	3.18361	13.0838	3.74612	1.59381	7.81031	0.151241	6.85328	0.877466	907.916	58.0406	967.789	48.7674	1106.36	74.9139	1106.36	74.9139	82.0632
10DM15-80	165.795	1862.4	1.50296	16.8543	5.9142	0.633682	9.67883	0.0774605	7.66172	0.791596	480.947	35.5081	498.387	38.1383	579.307	128.615	480.947	35.5081	83.0211
10DM15-81	552.033	152035	1.68612	9.22834	0.420411	4.56337	4.31004	0.305427	4.28949	0.995231	1718.16	64.6983	1742.6	35.912	1772.04	7.67581	1772.04	7.67581	96.9596
10DM15-82	567.286	392598	3.40105	8.66745	0.798042	5.06521	2.01514	0.31841	1.85038	0.91824	1781.96	28.8084	1830.3	17.0894	1885.72	14.3685	1885.72	14.3685	94.4977
10DM15-84	875.489	357045	1.15791	4.99908	0.376334	14.1113	3.62662	0.511629	3.60704	0.994601	2663.58	78.7047	2757.21	34.4004	2826.49	6.14272	2826.49	6.14272	94.2364
10DM15-87	184.14	119539	1.29476	9.0004	1.0705	4.9173	2.17994	0.320986	1.899	0.871122	1794.55	29.7464	1805.23	18.3961	1817.57	19.4346	1817.57	19.4346	98.7332
10DM15-88	136.583	66257.7	0.605376	8.74897	1.3978	5.3818	2.9507	0.341494	2.59861	0.880676	1893.85	42.6443	1881.96	25.2714	1868.85	25.2185	1868.85	25.2185	101.338
10DM15-89	353.274	266023	3.10607	8.52956	0.718857	5.79447	1.17649	0.358458	0.931333	0.791618	1974.86	15.8422	1945.58	10.1881	1914.54	12.898	1914.54	12.898	103.151
10DM15-90	70.6867	25357.4	1.57772	9.0983	3.17506	4.99396	3.73397	0.329537	1.96508	0.526271	1836.14	31.3982	1818.3	31.5989	1797.91	57.7929	1797.91	57.7929	102.126
10DM15-91	131.826	8926	3.34526	14.0262	6.08356	0.807472	8.04823	0.0821424	5.26917	0.6547	508.898	25.7837	601.035	36.5236	965.902	124.303	508.898	25.7837	52.6862
10DM15-93	46.5822	12461.4	0.774658	10.225	8.27845	3.29656	9.9308	0.244467	5.48526	0.552348	1409.88	69.4655	1480.24	77.5169	1582.57	155.089	1582.57	155.089	89.0878
10DM15-95	714.686	51564.7	2.40369	17.1883	2.58738	0.540243	4.32784	0.0673474	3.46925	0.801612	420.155	14.1114	438.585	15.4147	536.515	56.6523	420.155	14.1114	NA
10DM15-96	192.822	13900.1	2.33126	18.2637	12.1347	0.53949	13.3093	0.0714614	5.46687	0.410757	444.954	23.5047	438.089	47.3921	402.144	272.686	444.954	23.5047	NA
10DM15-97	169.595	85548.7	2.24318	8.54368	1.53604	5.49811	2.78605	0.340688	2.32436	0.834285	1889.98	38.0764	1900.3	23.9401	1911.58	27.5718	1911.58	27.5718	98.8702
10DM15-98	1006.36	1.1728e+06	2.32347	9.99734	0.296728	4.02549	1.34779	0.291878	1.31472	0.975464	1650.91	19.1484	1639.36	10.9625	1624.56	5.51793	1624.56	5.51793	101.622
10DM15-99	117.967	85389.3	1.75507	5.3055	0.846029	13.6858	1.74573	0.526617	1.52702	0.87472	2727.18	33.9573	2728.21	16.5203	2728.96	13.9299	2728.96	13.9299	99.9347
10DM15-100	131.243	26493.2	1.59677	10.9455	2.70166	3.28526	3.24588	0.260799	1.79911	0.554275	1493.93	23.9904	1477.57	25.2723	1454.13	51.4065	1454.13	51.4065	102.737
Sample 18BH1 - Lower Pennsylvanian Minnelusa Formation
							Isotope ratios						Apparent ages (Ma)
Analysis	U	206Pb	U/Th	206Pb*	±	207Pb*	±	206Pb*	±	error	206Pb*	±	207Pb*	±	206Pb*	±	Best age	±	Conc
	(ppm)	204Pb		207Pb*	(%)	235U*	(%)	238U	(%)	corr.	238U*	(Ma)	235U	(Ma)	207Pb*	(Ma)	(Ma)	(Ma)	(%)
18BH1-1 <>	65.8782	113192	1.27479	9.85808	0.899165	3.9713	1.98515	0.283938	1.76984	0.891538	1611.17	25.231	1628.35	16.1036	1650.61	16.6684	1650.61	16.6684	97.6105
18BH1-4 <>	584.358	78146.6	156.487	18.1925	1.01672	0.502259	1.30462	0.0662703	0.817505	0.626623	413.646	3.27537	413.23	4.42894	410.886	22.7384	413.646	3.27537	100.672
18BH1-5 <>	50.756	28545.7	0.784229	6.84268	2.19079	8.49264	5.15867	0.421471	4.67036	0.905342	2267.15	89.2742	2285.14	46.8956	2301.25	37.6456	2301.25	37.6456	98.5184
18BH1-6 <>	122.97	81655	1.13182	12.9623	0.680526	2.12698	3.31886	0.199961	3.24834	0.978752	1175.11	34.8948	1157.61	22.9261	1124.99	13.5828	1124.99	13.5828	104.455
18BH1-8 <>	83.403	261841	0.87554	5.0255	0.468066	15.5172	3.65932	0.565575	3.62926	0.991786	2889.63	84.5235	2847.54	34.9203	2817.88	7.64606	2817.88	7.64606	102.546
18BH1-9 <>	66.5873	62172.1	17.4683	13.3338	1.26623	1.95063	5.79907	0.188637	5.65914	0.97587	1113.99	57.8973	1098.66	38.9459	1068.45	25.4708	1068.45	25.4708	104.262
18BH1-10 <>	259.855	22067.2	1.55217	3.5428	0.723888	22.2983	2.15601	0.572949	2.03086	0.94195	2919.92	47.6877	3196.81	20.9551	3375.49	11.2938	3375.49	11.2938	86.5036
18BH1-11 <>	190.062	105287	1.82355	13.3711	0.629742	1.86272	1.08006	0.180639	0.877471	0.812428	1070.47	8.65459	1067.95	7.13598	1062.83	12.6683	1062.83	12.6683	100.718
18BH1-12 <>	43.3014	28159.2	1.8445	10.976	0.975982	3.29325	2.2836	0.262161	2.06453	0.904069	1500.89	27.6437	1479.46	17.7882	1448.84	18.5811	1448.84	18.5811	103.593
18BH1-13 <>	22.8888	15608.9	0.652078	13.6312	3.60593	1.77062	4.0486	0.175049	1.84077	0.454668	1039.87	17.6776	1034.75	26.2773	1023.92	72.9747	1023.92	72.9747	101.558
18BH1-14 <>	202.232	59886.3	1.0224	17.9279	1.70084	0.536664	2.1084	0.06978	1.246	0.59097	434.83	5.23931	436.223	7.4768	443.562	37.8228	434.83	5.23931	98.0313
18BH1-15 <>	144.139	298719	4.16856	8.78116	0.448136	5.42669	1.00141	0.34561	0.895546	0.894282	1913.6	14.8277	1889.08	8.58621	1862.22	8.09243	1862.22	8.09243	102.759
18BH1-16 <>	111.282	108224	1.54452	12.9782	0.932036	2.00037	1.32971	0.188289	0.948383	0.713227	1112.1	9.68733	1115.64	9.00187	1122.55	18.5782	1122.55	18.5782	99.0688
18BH1-18 <>	37.1643	30929.6	3.04897	12.7327	3.83625	2.12889	4.18006	0.196594	1.66015	0.397159	1157	17.5829	1158.22	28.8863	1160.5	76.088	1160.5	76.088	99.6984
18BH1-19 <>	112.13	52406.3	1.47975	9.09143	0.506319	4.97641	1.68279	0.328131	1.60482	0.953662	1829.32	25.5595	1815.32	14.2287	1799.28	9.21336	1799.28	9.21336	101.669
18BH1-20 <>	123.498	65601.9	0.653361	14.0378	0.62948	1.629	0.810816	0.165851	0.511055	0.630297	989.208	4.68662	981.472	5.10136	964.223	12.8635	964.223	12.8635	102.591
18BH1-21 <>	134.677	268639	1.19952	8.89015	0.378155	5.16639	0.553715	0.333115	0.404474	0.730474	1853.46	6.51533	1847.1	4.71059	1839.92	6.84709	1839.92	6.84709	100.736
18BH1-22 <>	137.337	187004	3.01445	8.20479	0.461217	6.25968	0.770406	0.372493	0.617093	0.800997	2041.12	10.7964	2012.83	6.74513	1983.91	8.20931	1983.91	8.20931	102.884
18BH1-23 <>	28.4161	5984.73	0.594213	12.0767	3.3587	2.56305	3.53459	0.224493	1.10112	0.311527	1305.57	13.0137	1290.16	25.8224	1264.59	65.6001	1264.59	65.6001	103.241
18BH1-24 <>	706.024	7882.64	1.35152	18.8702	0.826657	0.312586	2.9745	0.0427803	2.85732	0.960606	270.044	7.55663	276.184	7.19271	328.533	18.7776	270.044	7.55663	NA
18BH1-25 <>	458.419	77408.8	1.74161	16.4912	0.750882	0.836131	1.4409	0.100006	1.22978	0.853483	614.445	7.20739	617.008	6.66255	626.406	16.2059	614.445	7.20739	98.0905
18BH1-26 <>	104.562	90621.5	1.58461	10.6996	0.878178	3.39133	1.0847	0.263171	0.636684	0.58697	1506.04	8.55102	1502.39	8.50593	1497.23	16.6108	1497.23	16.6108	100.588
18BH1-27 <>	185.247	526004	0.602221	9.68548	0.293408	4.3422	0.558053	0.305021	0.474695	0.850627	1716.16	7.1523	1701.41	4.60573	1683.28	5.41694	1683.28	5.41694	101.953
18BH1-28 <>	246.635	34372.3	1.72772	9.88688	0.330667	3.6679	1.87863	0.263012	1.8493	0.984387	1505.23	24.8253	1564.41	14.9899	1645.2	6.13457	1645.2	6.13457	91.4925
18BH1-29 <>	104.539	88346.2	1.95034	10.9231	0.603992	3.30319	1.07888	0.261684	0.893965	0.828605	1498.45	11.9527	1481.81	8.40922	1458.04	11.4846	1458.04	11.4846	102.772
18BH1-30 <>	463.29	9458.3	1.61989	17.9102	0.979457	0.457327	2.18539	0.0594055	1.95361	0.893941	372.009	7.06189	382.397	6.96363	445.755	21.7906	372.009	7.06189	NA
18BH1-31 <>	173.796	41122.2	2.10165	9.11325	0.164796	4.75974	0.364708	0.314598	0.325353	0.89209	1763.29	5.01921	1777.83	3.06025	1794.92	3.00035	1794.92	3.00035	98.2379
18BH1-32 <>	346.441	529250	1.41608	8.24611	0.115794	6.06338	0.39565	0.362629	0.378326	0.956214	1994.62	6.49037	1985	3.44861	1974.97	2.0632	1974.97	2.0632	100.995
18BH1-33 <>	60.5936	32307.4	1.33387	12.7523	2.66136	2.16172	2.72768	0.199935	0.597817	0.219167	1174.97	6.42122	1168.82	18.9387	1157.44	52.8172	1157.44	52.8172	101.515
18BH1-35 <>	127.571	125444	2.92625	8.43375	0.399381	5.56511	1.69934	0.340403	1.65174	0.97199	1888.61	27.0409	1910.72	14.6276	1934.79	7.14979	1934.79	7.14979	97.6131
18BH1-36 <>	42.8298	17728.9	2.52362	9.90667	1.85045	4.08147	2.34399	0.293253	1.43878	0.613819	1657.77	21.0317	1650.61	19.1189	1641.49	34.3457	1641.49	34.3457	100.992
18BH1-37 <>	229.805	407858	2.41166	10.4718	0.346385	3.54032	0.501876	0.268881	0.363177	0.723638	1535.12	4.96108	1536.27	3.97361	1537.84	6.5166	1537.84	6.5166	99.8233
18BH1-38 <>	101.28	107171	0.844214	9.90192	0.544697	4.05197	2.13075	0.290994	2.05996	0.966773	1646.49	29.9322	1644.69	17.3545	1642.38	10.109	1642.38	10.109	100.251
18BH1-39 <>	205.922	84148.5	3.99237	9.56431	0.197527	3.84308	0.841019	0.266582	0.817494	0.972028	1523.43	11.0918	1601.82	6.77642	1706.49	3.63438	1706.49	3.63438	89.2728
18BH1-40 <>	59.9538	2199.61	2.01605	11.2316	1.41461	3.03226	1.8368	0.247005	1.17162	0.637861	1423.01	14.9605	1415.78	14.0261	1404.89	27.0935	1404.89	27.0935	101.29
18BH1-41 <>	48.4557	28597.6	3.09511	12.9501	1.3538	2.10087	1.5812	0.19732	0.816956	0.516668	1160.91	8.67916	1149.09	10.878	1126.85	26.9572	1126.85	26.9572	103.022
18BH1-42 <>	59.0132	87084.5	1.76613	13.2591	1.76936	1.87222	1.8728	0.18004	0.613784	0.327736	1067.19	6.0368	1071.32	12.396	1079.71	35.5066	1079.71	35.5066	98.8413
18BH1-43 <>	236.139	216053	0.728644	9.4837	0.357344	4.51073	0.969169	0.310258	0.900884	0.929544	1741.98	13.7516	1732.95	8.0552	1722.06	6.56515	1722.06	6.56515	101.157
18BH1-44 <>	57.7792	39369.2	1.69128	16.3759	3.24439	0.882541	3.35553	0.104819	0.856461	0.255238	642.587	5.2381	642.354	15.9742	641.557	69.7713	642.587	5.2381	100.161
18BH1-46 <>	116.844	232750	3.79049	9.08363	0.459834	4.85053	1.16303	0.319557	1.06826	0.918519	1787.56	16.677	1793.71	9.791	1800.84	8.36587	1800.84	8.36587	99.2626
18BH1-47 <>	111.097	102806	0.735866	9.91766	0.479844	3.94098	1.36042	0.283473	1.27298	0.93573	1608.83	18.1246	1622.14	11.0182	1639.43	8.90875	1639.43	8.90875	98.1336
18BH1-48 <>	31.6948	33700.5	2.37551	9.2822	1.89473	4.79156	2.13063	0.322572	0.974457	0.457357	1802.28	15.3211	1783.42	17.9005	1761.41	34.639	1761.41	34.639	102.32
18BH1-49 <>	495.502	846283	3.83579	6.3627	0.540572	9.35031	2.05717	0.431485	1.98488	0.964857	2312.41	38.5689	2372.97	18.8723	2425.38	9.16667	2425.38	9.16667	95.3421
18BH1-50 <>	65.2122	77326.2	1.97832	9.09671	0.769909	4.95142	0.955997	0.326672	0.56672	0.592805	1822.23	8.99572	1811.07	8.07616	1798.23	14.0118	1798.23	14.0118	101.335
18BH1-51 <>	99.0801	102964	1.9845	10.6375	0.677583	3.44619	0.986052	0.265876	0.716365	0.726499	1519.84	9.69932	1515	7.76049	1508.23	12.7961	1508.23	12.7961	100.769
18BH1-52 <>	30.2685	52063.2	0.63835	10.0091	0.814461	3.99855	1.45892	0.290266	1.21041	0.829664	1642.86	17.5538	1633.9	11.8506	1622.37	15.153	1622.37	15.153	101.263
18BH1-53 <>	92.7439	66048.4	2.55342	14.5142	1.40948	1.44278	2.48657	0.151877	2.04852	0.823832	911.476	17.4119	906.875	14.9134	895.706	29.0909	895.706	29.0909	101.761
18BH1-54 <>	218.983	48935.4	1.81976	9.15462	0.732854	4.03609	1.43622	0.267978	1.23517	0.860016	1530.53	16.828	1641.5	11.6879	1786.67	13.3546	1786.67	13.3546	85.664
18BH1-55 <>	65.4986	154919	1.17352	9.40699	0.801408	4.23292	2.30062	0.288795	2.15652	0.937367	1635.5	31.1517	1680.43	18.8982	1736.96	14.6945	1736.96	14.6945	94.1589
18BH1-56 <>	252.201	231453	1.2591	10.3897	0.430089	3.68897	0.889462	0.277975	0.778566	0.875323	1581.15	10.9168	1568.98	7.10545	1552.63	8.07558	1552.63	8.07558	101.837
18BH1-57 <>	103.102	54777.1	1.15807	16.5829	1.61854	0.840926	1.86168	0.101138	0.919876	0.494112	621.077	5.44656	619.657	8.63508	614.45	34.95	621.077	5.44656	101.079
18BH1-58 <>	342.593	219871	2.02798	5.12416	0.594765	13.8329	2.17563	0.514085	2.09275	0.961907	2674.04	45.8066	2738.33	20.6045	2786.08	9.74048	2786.08	9.74048	95.9789
18BH1-59 <>	133.371	67332.5	5.01714	13.375	0.663748	1.90771	1.32245	0.185057	1.14382	0.864922	1094.54	11.5144	1083.79	8.81012	1062.24	13.3526	1062.24	13.3526	103.041
18BH1-60 <>	65.8586	153664	1.01685	5.11453	0.316794	13.3122	2.08247	0.493804	2.05823	0.988361	2587.11	43.8612	2702.05	19.6701	2789.16	5.18866	2789.16	5.18866	92.7561
18BH1-61 <>	158.69	207914	2.18912	9.30697	0.307763	4.69794	0.484852	0.317113	0.374651	0.772712	1775.61	5.81483	1766.87	4.05911	1756.54	5.62994	1756.54	5.62994	101.086
18BH1-62 <>	145.574	112358	2.40341	8.84412	0.38371	5.17161	0.765203	0.331726	0.662044	0.865187	1846.74	10.6309	1847.96	6.51088	1849.31	6.93786	1849.31	6.93786	99.861
18BH1-63 <>	135.225	215560	6.0408	8.45554	0.252771	5.05447	1.11557	0.309968	1.08655	0.973991	1740.55	16.5739	1828.5	9.45665	1930.17	4.52562	1930.17	4.52562	90.176
18BH1-64 <>	185.797	312709	2.83764	9.06992	0.280924	5.04674	0.713476	0.33198	0.655843	0.919222	1847.97	10.5374	1827.2	6.0465	1803.59	5.10917	1803.59	5.10917	102.461
18BH1-65 <>	86.3646	124657	1.03909	9.98741	0.593984	3.85861	1.31458	0.2795	1.17273	0.892097	1588.84	16.5143	1605.07	10.6011	1626.41	11.0448	1626.41	11.0448	97.6904
18BH1-66 <>	47.2179	23836.4	2.03172	13.4348	2.37734	1.82335	2.43313	0.177664	0.518026	0.212906	1054.2	5.03787	1053.89	15.9564	1053.27	47.8985	1053.27	47.8985	100.088
18BH1-68 <>	148.033	59317	1.05437	10.9311	0.539004	2.99825	1.00401	0.237701	0.847059	0.843677	1374.73	10.4869	1407.18	7.64493	1456.64	10.2508	1456.64	10.2508	94.3768
18BH1-69 <>	287.755	304529	1.00256	9.86515	0.202271	4.07249	0.565487	0.291382	0.528074	0.933839	1648.43	7.68106	1648.81	4.60993	1649.28	3.75057	1649.28	3.75057	99.9486
18BH1-70 <>	60.8029	80843	1.30031	13.4448	1.60181	1.81224	1.77526	0.176713	0.765336	0.431113	1048.99	7.40916	1049.89	11.6165	1051.77	32.2972	1051.77	32.2972	99.7363
18BH1-71 <>	202.401	450280	2.37018	10.9705	0.387174	3.25436	0.908822	0.258936	0.822225	0.904715	1484.39	10.9018	1470.22	7.05906	1449.79	7.37007	1449.79	7.37007	102.387
18BH1-72 <>	58.1136	50415.3	1.71144	10.6279	0.71284	3.36996	0.814388	0.259759	0.393812	0.483567	1488.61	5.23467	1497.44	6.37697	1509.95	13.459	1509.95	13.459	98.5865
18BH1-73 <>	100.739	136972	4.54154	8.57443	0.537641	5.6485	1.11413	0.351266	0.975823	0.87586	1940.64	16.3526	1923.53	9.61144	1905.12	9.65888	1905.12	9.65888	101.864
18BH1-74 <>	128.826	4511.89	1.46845	11.7766	6.77705	2.64694	7.83705	0.226081	3.93585	0.502211	1313.93	46.7854	1313.79	57.8186	1313.56	131.582	1313.56	131.582	100.028
18BH1-75 <>	69.5519	43569.4	1.14658	11.0046	0.630245	3.18346	0.963987	0.25408	0.729426	0.756676	1459.48	9.52675	1453.15	7.44856	1443.89	12.0067	1443.89	12.0067	101.08
18BH1-76 <>	49.6756	12158.8	1.40645	10.5066	1.87853	3.55535	2.76579	0.270922	2.02996	0.733952	1545.48	27.8954	1539.63	21.9219	1531.58	35.3717	1531.58	35.3717	100.907
18BH1-77 <>	118.141	20274.3	3.14967	9.9966	0.375094	3.3424	0.700693	0.242331	0.591841	0.84465	1398.81	7.4421	1491.02	5.47634	1624.7	6.97554	1624.7	6.97554	86.0964
18BH1-78 <>	329.304	70501.7	0.48836	9.92365	0.340902	4.01641	4.97135	0.289073	4.95965	0.997646	1636.9	71.6997	1637.52	40.437	1638.31	6.33006	1638.31	6.33006	99.9138
18BH1-80 <>	33.7059	10228.7	0.999199	9.88246	1.66933	4.08754	1.86138	0.292972	0.823441	0.442383	1656.36	12.0279	1651.82	15.1863	1646.03	30.9651	1646.03	30.9651	100.628
18BH1-81 <>	177.438	413777	1.88647	9.03938	0.194149	5.0228	0.707677	0.329294	0.680524	0.961631	1834.96	10.8674	1823.17	5.99263	1809.72	3.52832	1809.72	3.52832	101.394
18BH1-82 <>	121.018	21847.5	1.24146	9.68565	0.722853	4.19819	1.36463	0.29491	1.15745	0.848181	1666.02	16.9931	1673.67	11.1911	1683.25	13.3456	1683.25	13.3456	98.9762
18BH1-83 <>	68.3235	21614	3.13832	10.6611	0.700849	3.55294	2.63024	0.274718	2.53515	0.963847	1564.71	35.2208	1539.09	20.8441	1504.06	13.2445	1504.06	13.2445	104.032
18BH1-84 <>	198.978	101345	0.926908	5.0664	0.125512	14.1686	2.25491	0.520626	2.25141	0.99845	2701.84	49.6918	2761.06	21.3897	2804.63	2.05277	2804.63	2.05277	96.3348
18BH1-85 <>	146.182	120671	5.12822	12.3034	0.55464	2.29189	1.97039	0.20451	1.89072	0.959565	1199.5	20.6943	1209.79	13.9302	1228.17	10.8954	1228.17	10.8954	97.6659
18BH1-87 <>	96.5128	21360.3	1.03536	18.4308	4.92717	0.546742	5.77484	0.0730843	3.01194	0.521563	454.711	13.2238	442.86	20.7298	381.715	110.831	454.711	13.2238	119.123
18BH1-88 <>	267.981	214253	1.51925	9.10766	0.155201	4.86541	0.656488	0.321385	0.637879	0.971653	1796.49	10.0012	1796.29	5.52945	1796.04	2.82527	1796.04	2.82527	100.025
18BH1-89 <>	40.8594	36820.2	0.874003	9.91582	1.2637	4.05335	1.49114	0.291502	0.791556	0.53084	1649.03	11.5172	1644.97	12.1452	1639.78	23.4581	1639.78	23.4581	100.564
18BH1-90 <>	83.3955	129047	1.13723	9.29621	0.588154	4.65208	0.830402	0.313655	0.58621	0.705935	1758.67	9.02282	1758.67	6.94007	1758.65	10.7564	1758.65	10.7564	100.001
18BH1-92 <>	63.7564	72385.7	1.52003	10.4925	0.921073	3.72554	1.38679	0.283509	1.03673	0.747577	1609.01	14.7623	1576.87	11.1019	1534.11	17.3356	1534.11	17.3356	104.882
18BH1-93 <>	59.3165	84060.4	0.609817	13.9308	3.02489	1.68379	3.07895	0.170123	0.574449	0.186573	1012.79	5.38395	1002.42	19.6167	979.779	61.6146	979.779	61.6146	103.369
18BH1-94 <>	66.9422	92705.4	1.49377	9.67929	0.986463	4.26009	1.77352	0.299062	1.47386	0.831037	1686.66	21.873	1685.69	14.5855	1684.46	18.2099	1684.46	18.2099	100.13
18BH1-95 <>	10.1733	18215.5	0.786585	7.34014	2.52243	7.45939	3.90138	0.397106	2.97626	0.762873	2155.7	54.5351	2168.12	34.9449	2179.89	43.9153	2179.89	43.9153	98.8902
18BH1-96 <>	258.964	261424	3.42814	9.41071	0.153982	4.50856	0.400665	0.307722	0.369894	0.923201	1729.49	5.61099	1732.55	3.32976	1736.24	2.82392	1736.24	2.82392	99.6113
18BH1-97 <>	152.814	91897.1	0.952435	12.0046	0.380088	2.43344	1.4408	0.211869	1.38977	0.964577	1238.77	15.6629	1252.54	10.3691	1276.27	7.40896	1276.27	7.40896	97.0612
18BH1-98 <>	102.091	135084	1.13475	9.34023	0.51208	4.61676	0.713389	0.312747	0.496688	0.696237	1754.21	7.62806	1752.3	5.95406	1750.01	9.37342	1750.01	9.37342	100.24
18BH1-99 <>	213.583	351083	2.13277	8.54807	0.2492	5.49108	0.689791	0.340427	0.643203	0.932462	1888.73	10.5305	1899.2	5.92506	1910.65	4.47396	1910.65	4.47396	98.8523
18BH1-100 <>	56.98	108880	2.1068	13.7687	1.32582	1.74967	1.73502	0.174722	1.11915	0.645037	1038.08	10.7305	1027.04	11.2105	1003.58	26.9038	1003.58	26.9038	103.437
18BH1-101 <>	234.608	383801	2.79467	9.13013	0.204831	4.98212	0.65132	0.329905	0.618273	0.949262	1837.92	9.88708	1816.29	5.50792	1791.55	3.7308	1791.55	3.7308	102.588
18BH1-102 <>	81.8304	49936.4	2.50373	14.2039	1.51394	1.57994	1.60571	0.16276	0.535054	0.333221	972.094	4.82806	962.344	9.98482	940.113	31.0401	940.113	31.0401	103.402
18BH1-103 <>	240.057	219977	1.27681	11.5509	0.387575	2.77939	0.832527	0.232844	0.736809	0.885027	1349.39	8.97079	1350.02	6.21672	1350.99	7.47746	1350.99	7.47746	99.8814
18BH1-104 <>	88.7916	98355.4	1.62076	12.2238	1.38189	2.34536	1.48844	0.20793	0.553042	0.371557	1217.78	6.13693	1226.15	10.5961	1240.91	27.0904	1240.91	27.0904	98.136
Sample 180713SWC3 - Mississippian Kibbey Formation
							Isotope ratios						Apparent ages (Ma)
Analysis	U	206Pb	U/Th	206Pb*	±	207Pb*	±	206Pb*	±	error	206Pb*	±	207Pb*	±	206Pb*	±	Best age	±	Conc
	(ppm)	204Pb		207Pb*	(%)	235U*	(%)	238U	(%)	corr.	238U*	(Ma)	235U	(Ma)	207Pb*	(Ma)	(Ma)	(Ma)	(%)
-180713SWC3 Spot 38	43.571	959.15	3.36209	21.0151	2.97697	0.420051	3.1694	0.0640504	1.08753	0.343135	400.211	4.22008	356.088	9.51958	77.616	70.7095	400.211	4.22008	515.63
-180713SWC3 Spot 81	313.526	11112.4	6.58507	18.495	0.856969	0.484743	1.2747	0.065051	0.943645	0.740287	406.27	3.71544	401.321	4.22572	372.905	19.2813	406.27	3.71544	108.947
-180713SWC3 Spot 102	84.5833	10679.5	3.38717	18.7343	1.34187	0.481294	1.66046	0.0654238	0.978008	0.588998	408.526	3.87145	398.96	5.47812	343.896	30.3441	408.526	3.87145	118.793
-180713SWC3 Spot 34	578.018	32813.3	4.58867	18.3791	0.663561	0.495661	1.13576	0.0660992	0.921752	0.811576	412.612	3.6841	408.761	3.8218	387.045	14.9014	412.612	3.6841	106.606
-180713SWC3 Spot 24	385.032	21740.2	4.56518	18.0785	0.835308	0.504398	1.24866	0.0661644	0.928128	0.743297	413.006	3.71301	414.675	4.25098	423.953	18.6375	413.006	3.71301	97.4178
-180713SWC3 Spot 106	54.7308	8991.05	2.29883	18.281	1.37092	0.502721	1.57874	0.0666829	0.782945	0.49593	416.14	3.15521	413.542	5.36282	399.05	30.7227	416.14	3.15521	104.283
-180713SWC3 Spot 50	305.395	38791.8	1.34425	17.8508	0.862122	0.515133	1.40209	0.0667216	1.10571	0.788618	416.374	4.45837	421.895	4.84036	452.164	19.1634	416.374	4.45837	92.0847
-180713SWC3 Spot 26	774.475	31866.9	2.0243	18.0971	0.622769	0.517171	1.05196	0.0679097	0.847812	0.805933	423.55	3.47548	423.26	3.6411	421.658	13.9016	423.55	3.47548	100.449
-180713SWC3 Spot 83	141.166	5240.7	1.66042	18.9209	1.59841	0.496703	1.9715	0.068191	1.15407	0.585379	425.248	4.7493	409.468	6.64344	321.461	36.3154	425.248	4.7493	132.286
-180713SWC3 Spot 71	132.712	159609	1.91555	18.0081	1.2273	0.523055	1.56239	0.0683444	0.966839	0.618822	426.173	3.98716	427.19	5.44822	432.661	27.3437	426.173	3.98716	98.5006
-180713SWC3 Spot 90	166.202	6778.97	1.51783	18.7546	1.70553	0.503301	1.8485	0.0684893	0.712816	0.38562	427.048	2.94543	413.934	6.28399	341.471	38.6129	427.048	2.94543	125.061
-180713SWC3 Spot 97	172.457	95256.7	0.790356	17.9727	0.717792	0.528411	1.06469	0.0689086	0.78635	0.73857	429.577	3.26789	430.755	3.73756	437.037	15.98	429.577	3.26789	98.2931
-180713SWC3 Spot 74	426.363	17680.7	1.0583	18.0934	0.784588	0.525357	1.23277	0.0689704	0.950869	0.771325	429.95	3.9549	428.724	4.31121	422.119	17.5115	429.95	3.9549	101.855
-180713SWC3 Spot 64	241.349	32709.1	1.50943	17.9585	0.583459	0.531172	1.37451	0.0692136	1.24453	0.905436	431.416	5.19341	432.587	4.84165	438.803	12.9847	431.416	5.19341	98.3166
-180713SWC3 Spot 85	288.907	13874.6	2.27176	18.271	0.994277	0.528362	1.46969	0.0700458	1.08232	0.736425	436.432	4.56723	430.722	5.15901	400.276	22.2779	436.432	4.56723	109.033
-180713SWC3 Spot 25	353.007	14349.5	1.7992	17.6438	0.785991	0.552306	1.46567	0.0707067	1.2371	0.844048	440.412	5.26638	446.506	5.29508	478.004	17.3852	440.412	5.26638	92.1356
-180713SWC3 Spot 59	294.143	104535	2.42071	17.6292	0.752063	0.5766	1.04432	0.0737555	0.724575	0.693824	458.742	3.20842	462.274	3.8781	479.843	16.6137	458.742	3.20842	95.6025
-180713SWC3 Spot 43	206.604	5689.18	1.92019	17.1801	1.54497	0.594829	1.82624	0.0741491	0.973778	0.533214	461.104	4.33331	473.947	6.91629	536.588	33.8201	461.104	4.33331	85.9326
-180713SWC3 Spot 14	253.244	11678	1.88079	18.0746	0.705737	0.568118	1.31077	0.0745065	1.10456	0.842679	463.249	4.93731	456.797	4.8219	424.445	15.7457	463.249	4.93731	109.142
-180713SWC3 Spot 63	354.445	9178.66	2.60857	18.0551	0.891028	0.578239	1.41441	0.075752	1.09846	0.776624	470.717	4.98638	463.329	5.26191	426.85	19.8717	470.717	4.98638	110.277
-180713SWC3 Spot 11	117.213	20566.7	2.5412	17.2366	1.16607	0.72187	1.46734	0.0902812	0.890709	0.607024	557.2	4.75459	551.77	6.24631	529.442	25.5594	557.2	4.75459	105.243
-180713SWC3 Spot 109	119.735	7235.69	2.20134	16.8729	1.36326	0.810501	1.65341	0.0992272	0.935571	0.565843	609.878	5.44425	602.735	7.51577	575.982	29.6363	609.878	5.44425	105.885
-180713SWC3 Spot 105	451.322	34828.7	6.42542	14.2902	0.690376	1.48937	1.4199	0.154429	1.24077	0.87384	925.743	10.6997	926.059	8.62604	926.815	14.1654	926.815	14.1654	99.8844
-180713SWC3 Spot 89	19.6145	2627.92	19.7509	14.0368	1.90229	1.63768	2.34761	0.166796	1.37571	0.586004	994.436	12.6776	984.82	14.8011	963.469	38.8417	963.469	38.8417	103.214
-180713SWC3 Spot 92	107.545	38425.2	4.31461	13.9746	0.589118	1.66315	1.06669	0.168639	0.889253	0.833655	1004.61	8.27219	994.576	6.76411	972.516	12.0143	972.516	12.0143	103.3
-180713SWC3 Spot 103	307.674	112211	10.6484	13.9277	0.614485	1.52355	1.17236	0.153965	0.99842	0.851631	923.154	8.58741	939.907	7.18694	979.396	12.5197	979.396	12.5197	94.2575
-180713SWC3 Spot 44	321.376	20981.2	3.90071	13.9004	0.647853	1.68551	1.26051	0.169999	1.08129	0.857814	1012.1	10.1279	1003.07	8.03323	983.367	13.1902	983.367	13.1902	102.922
-180713SWC3 Spot 13	70.7998	16544.3	2.16015	13.8109	0.784075	1.73475	1.39402	0.173839	1.15261	0.826827	1033.23	11.0038	1021.52	8.97904	996.488	15.9136	996.488	15.9136	103.687
-180713SWC3 Spot 2	25.6344	7233.28	3.11574	13.7468	1.20718	1.70342	1.46415	0.169906	0.828534	0.565879	1011.59	7.75687	1009.81	9.36779	1005.94	24.4753	1005.94	24.4753	100.562
-180713SWC3 Spot 73	675.09	380882	4.85784	13.7205	0.645322	1.70971	1.13995	0.170208	0.939703	0.824338	1013.26	8.81103	1012.18	7.30336	1009.82	13.0863	1009.82	13.0863	100.341
-180713SWC3 Spot 19	73.9718	31039.2	1.85649	13.6958	0.677156	1.7252	1.2079	0.17144	1.00024	0.828083	1020.04	9.43661	1017.96	7.76445	1013.48	13.7245	1013.48	13.7245	100.648
-180713SWC3 Spot 76	67.8949	10507	3.14344	13.6894	0.932278	1.72002	1.22978	0.170846	0.802008	0.652156	1016.77	7.544	1016.03	7.89637	1014.42	18.892	1014.42	18.892	100.231
-180713SWC3 Spot 68	212.509	11902	3.19121	13.6395	0.693681	1.73247	0.98982	0.171455	0.706081	0.713343	1020.12	6.66189	1020.67	6.37238	1021.82	14.0419	1021.82	14.0419	99.834
-180713SWC3 Spot 0	90.2889	117032	4.4771	13.5956	0.861017	1.72268	1.38007	0.169938	1.07854	0.781511	1011.77	10.0991	1017.02	8.86648	1028.34	17.4297	1028.34	17.4297	98.3885
-180713SWC3 Spot 98	276.184	4.24544e+06	4.27815	13.5719	0.692819	1.74698	1.2004	0.172035	0.980288	0.816634	1023.31	9.27573	1026.05	7.7517	1031.86	14.0205	1031.86	14.0205	99.1715
-180713SWC3 Spot 54	92.6593	29013.3	2.76465	13.5478	0.981456	1.83807	1.30227	0.180684	0.85595	0.657275	1070.71	8.4441	1059.17	8.56407	1035.45	19.8444	1035.45	19.8444	103.405
-180713SWC3 Spot 8	120.041	24364.1	3.1086	13.483	0.620837	1.73246	1.05148	0.169488	0.848625	0.807079	1009.29	7.92824	1020.67	6.76933	1045.17	12.5416	1045.17	12.5416	96.5668
-180713SWC3 Spot 28	183.966	80634.7	2.40154	13.4731	0.490252	1.70591	0.879805	0.166767	0.730555	0.83036	994.274	6.73128	1010.75	5.63201	1046.65	9.90448	1046.65	9.90448	94.9957
-180713SWC3 Spot 70	185.096	53909.5	0.938429	13.4725	0.726181	1.78172	1.01833	0.17417	0.713905	0.701054	1035.05	6.82655	1038.81	6.62294	1046.74	14.6628	1046.74	14.6628	98.8827
-180713SWC3 Spot 84	159.953	150718	3.57967	13.4011	0.872111	1.78802	1.45786	0.17386	1.16824	0.801337	1033.35	11.1541	1041.1	9.49368	1057.45	17.5644	1057.45	17.5644	97.7208
-180713SWC3 Spot 12	14.8215	3889.24	2.46631	13.3986	1.7527	1.92188	1.97417	0.186842	0.908507	0.460198	1104.24	9.21994	1088.72	13.1857	1057.82	35.3056	1057.82	35.3056	104.389
-180713SWC3 Spot 107	80.4384	10769.8	4.65758	13.3885	0.914769	1.84562	1.30552	0.179292	0.931438	0.713462	1063.11	9.12876	1061.87	8.59782	1059.34	18.4116	1059.34	18.4116	100.355
-180713SWC3 Spot 42	184.768	26794.5	3.45321	13.3336	0.786402	1.80944	1.1758	0.175057	0.874116	0.743422	1039.92	8.39477	1048.87	7.68947	1067.6	15.7951	1067.6	15.7951	97.4068
-180713SWC3 Spot 1	121.73	38458.2	3.24703	13.3264	0.571649	1.81881	1.03456	0.175868	0.862287	0.833479	1044.36	8.3138	1052.25	6.7782	1068.69	11.476	1068.69	11.476	97.7241
-180713SWC3 Spot 6	334.089	105271	2.3133	13.2828	0.602459	1.84007	1.08577	0.177342	0.90329	0.831937	1052.44	8.7711	1059.89	7.14298	1075.27	12.0829	1075.27	12.0829	97.8764
-180713SWC3 Spot 31	237.528	89529.6	2.09833	13.2655	0.727845	1.87443	1.23238	0.180418	0.994481	0.806962	1069.26	9.7985	1072.1	8.16019	1077.86	14.6091	1077.86	14.6091	99.2022
-180713SWC3 Spot 3	89.6076	14291.3	13.2069	13.1962	0.757317	2.0067	1.38651	0.19214	1.16142	0.837653	1132.96	12.0669	1117.78	9.39633	1088.36	15.1757	1088.36	15.1757	104.097
-180713SWC3 Spot 96	175.568	40959.3	3.26242	13.08	0.70932	1.85624	1.27131	0.176169	1.05503	0.829878	1046.01	10.1869	1065.65	8.38938	1106.06	14.1588	1106.06	14.1588	94.5712
-180713SWC3 Spot 16	232.121	32573.2	2.44451	13.0302	0.479778	1.99582	0.968545	0.188694	0.841363	0.868688	1114.3	8.60976	1114.1	6.55181	1113.72	9.58696	1113.72	9.58696	100.052
-180713SWC3 Spot 10	435.271	46488.5	2.90048	12.9787	0.57036	1.8722	1.1895	0.176307	1.04384	0.877543	1046.77	10.0856	1071.31	7.87299	1121.59	11.3728	1121.59	11.3728	93.3295
-180713SWC3 Spot 48	200.495	109711	3.9185	12.8953	0.571383	2.09245	1.11613	0.195782	0.958789	0.859027	1152.62	10.1196	1146.33	7.66843	1134.46	11.3758	1134.46	11.3758	101.6
-180713SWC3 Spot 37	90.3625	44037.5	1.41358	12.8751	1.29642	1.90473	1.73865	0.177939	1.15852	0.666336	1055.71	11.2817	1082.75	11.5768	1137.55	25.7923	1137.55	25.7923	92.8058
-180713SWC3 Spot 78	67.5709	30012.5	3.2263	12.7799	0.783739	2.15157	1.19263	0.199513	0.898956	0.753758	1172.71	9.63882	1165.56	8.2675	1152.29	15.5476	1152.29	15.5476	101.772
-180713SWC3 Spot 7	199.701	115845	2.39686	12.7082	0.535292	2.1296	1.09447	0.196368	0.954631	0.872234	1155.78	10.1009	1158.46	7.56223	1163.45	10.6282	1163.45	10.6282	99.3402
-180713SWC3 Spot 36	173.602	12281.1	2.94884	12.6545	0.875206	2.1567	1.40733	0.198026	1.10208	0.783103	1164.71	11.7433	1167.21	9.76326	1171.88	17.3306	1171.88	17.3306	99.3881
-180713SWC3 Spot 15	310.024	47309.2	7.23311	12.6297	0.683501	2.07629	1.28771	0.19027	1.09134	0.847506	1122.84	11.2462	1141.01	8.82513	1175.76	13.5408	1175.76	13.5408	95.499
-180713SWC3 Spot 29	203.149	42400.6	2.22147	12.5904	2.27141	1.88892	2.49335	0.17256	1.02834	0.412434	1026.2	9.75574	1077.2	16.555	1181.92	44.9107	1181.92	44.9107	86.8247
-180713SWC3 Spot 72	85.9306	20605	3.88984	12.5703	0.815058	2.29111	1.24896	0.208968	0.946351	0.757712	1223.32	10.5448	1209.55	8.82862	1185.07	16.0848	1185.07	16.0848	103.227
-180713SWC3 Spot 65	425.001	129589	3.44636	12.5398	0.556487	2.20779	1.11517	0.20088	0.966401	0.866594	1180.05	10.4211	1183.51	7.7935	1189.83	10.9682	1189.83	10.9682	99.1775
-180713SWC3 Spot 99	137.305	39950	3.59422	12.5222	0.739709	2.20738	1.13077	0.200561	0.855267	0.756355	1178.33	9.21047	1183.38	7.90208	1192.63	14.5968	1192.63	14.5968	98.8013
-180713SWC3 Spot 23	292.898	33157.9	3.13889	12.4762	0.612747	2.20869	1.27282	0.199943	1.11562	0.876496	1175.01	11.9834	1183.8	8.89642	1199.88	12.0645	1199.88	12.0645	97.9276
-180713SWC3 Spot 56	55.0101	8919.35	3.01771	12.4102	0.886943	2.33128	1.3804	0.209924	1.05775	0.766265	1228.41	11.8306	1221.87	9.80917	1210.35	17.4771	1210.35	17.4771	101.492
-180713SWC3 Spot 39	124.371	31096.2	2.43413	12.3914	0.675471	2.24292	1.13568	0.201661	0.912965	0.803894	1184.24	9.87673	1194.57	7.97576	1213.33	13.2819	1213.33	13.2819	97.602
-180713SWC3 Spot 60	199.734	50669	4.04669	12.3361	0.775285	2.28034	1.22994	0.20411	0.954826	0.776317	1197.36	10.4338	1206.22	8.68173	1222.1	15.2507	1222.1	15.2507	97.9757
-180713SWC3 Spot 75	370.923	97930.2	1.51041	12.2469	0.602049	2.28414	1.06524	0.202971	0.878791	0.82497	1191.26	9.55835	1207.4	7.52291	1236.36	11.8258	1236.36	11.8258	96.3524
-180713SWC3 Spot 82	146.542	15110.2	2.36803	12.0941	0.769821	2.3686	1.20167	0.207851	0.922702	0.767852	1217.36	10.2357	1233.18	8.57959	1260.94	15.0452	1260.94	15.0452	96.544
-180713SWC3 Spot 100	209.589	23931.8	2.73485	11.8879	0.543781	2.64956	0.979117	0.228543	0.814231	0.831598	1326.86	9.76437	1314.52	7.2178	1294.44	10.5761	1294.44	10.5761	102.505
-180713SWC3 Spot 45	66.6238	53751.7	3.54432	11.8361	0.828773	2.67736	1.30955	0.229934	1.01394	0.774261	1334.15	12.2194	1322.23	9.68137	1302.94	16.0992	1302.94	16.0992	102.396
-180713SWC3 Spot 35	206.984	42589.1	3.25291	11.7457	0.510355	2.64274	1.05024	0.225228	0.917905	0.873992	1309.44	10.8773	1312.62	7.73668	1317.81	9.89316	1317.81	9.89316	99.3648
-180713SWC3 Spot 21	79.7715	30331.9	1.89214	11.7132	0.730969	2.62554	1.3261	0.223143	1.10645	0.834362	1298.46	13.0123	1307.82	9.75136	1323.18	14.1585	1323.18	14.1585	98.1318
-180713SWC3 Spot 4	240.785	51131.3	2.27901	11.4207	0.585495	2.88525	1.05472	0.239091	0.87728	0.831769	1381.97	10.9123	1378.06	7.95314	1372	11.2652	1372	11.2652	100.726
-180713SWC3 Spot 32	167.072	81102.5	3.54941	11.1088	0.585801	3.13213	1.03899	0.252463	0.858097	0.825898	1451.16	11.1503	1440.62	7.99677	1425.07	11.1885	1425.07	11.1885	101.831
-180713SWC3 Spot 95	332.041	23880.2	4.29574	10.8099	0.615865	3.34205	1.24669	0.262135	1.08394	0.869461	1500.75	14.5126	1490.93	9.74358	1476.98	11.6806	1476.98	11.6806	101.61
-180713SWC3 Spot 80	689.567	359778	3.57758	10.6593	0.620583	3.18161	1.35537	0.246074	1.20495	0.889019	1418.2	15.3394	1452.71	10.4714	1503.54	11.7284	1503.54	11.7284	94.3236
-180713SWC3 Spot 33	939.102	549234	4.83213	10.2499	0.58678	3.52026	1.06162	0.261807	0.884717	0.833366	1499.08	11.8334	1531.78	8.39498	1577.21	10.9807	1577.21	10.9807	95.0466
-180713SWC3 Spot 88	55.1129	24383.6	1.40775	10.1337	0.846945	3.91067	1.27178	0.287547	0.948744	0.745995	1629.26	13.6588	1615.89	10.2841	1598.5	15.8079	1598.5	15.8079	101.924
-180713SWC3 Spot 104	120.381	23486.5	1.0681	10.0611	0.636245	3.96906	0.980533	0.289748	0.746082	0.760894	1640.27	10.8049	1627.89	7.9527	1611.92	11.8528	1611.92	11.8528	101.759
-180713SWC3 Spot 47	79.1109	31610.2	1.7116	9.92612	0.630327	4.02371	1.05206	0.289797	0.842328	0.800647	1640.52	12.2004	1639	8.55623	1637.04	11.7063	1637.04	11.7063	100.212
-180713SWC3 Spot 18	266.997	55922	1.31939	9.85105	0.522183	4.02891	1.07518	0.287977	0.939863	0.874143	1631.41	13.5467	1640.05	8.74655	1651.12	9.68026	1651.12	9.68026	98.8062
-180713SWC3 Spot 41	323.621	14208	1.63636	9.82378	0.654454	3.6601	1.54338	0.260891	1.39776	0.905644	1494.4	18.6437	1562.71	12.309	1656.26	12.1227	1656.26	12.1227	90.2274
-180713SWC3 Spot 101	717.313	20204.6	2.88736	9.78494	0.692838	3.68615	1.52303	0.261709	1.35632	0.890539	1498.58	18.136	1568.37	12.1651	1663.6	12.8218	1663.6	12.8218	90.0807
-180713SWC3 Spot 30	326.154	96673.4	1.28973	9.71581	0.703478	4.03724	1.15471	0.28461	0.915681	0.792997	1614.54	13.078	1641.73	9.39738	1676.71	12.9988	1676.71	12.9988	96.2924
-180713SWC3 Spot 108	90.6241	19187.9	2.38038	9.65484	0.5849	4.22286	1.16462	0.295828	1.00709	0.864738	1670.59	14.8211	1678.47	9.56147	1688.33	10.7917	1688.33	10.7917	98.9493
-180713SWC3 Spot 51	235.402	33351.3	4.70996	9.33623	0.708535	4.60061	1.36373	0.311656	1.16522	0.854437	1748.85	17.8478	1749.38	11.3752	1749.99	12.9702	1749.99	12.9702	99.9345
-180713SWC3 Spot 46	219.312	376012	24.8416	9.3348	0.493769	4.44232	1.11951	0.300886	1.00473	0.897478	1695.7	14.9807	1720.27	9.27885	1750.28	9.03789	1750.28	9.03789	96.8819
-180713SWC3 Spot 49	102.839	11553.1	3.68999	9.29192	0.491167	4.64263	0.911871	0.31301	0.768286	0.842538	1755.5	11.8068	1756.97	7.61823	1758.7	8.98259	1758.7	8.98259	99.818
-180713SWC3 Spot 17	218.099	115133	2.0887	9.19687	0.624305	3.89872	1.21857	0.260165	1.0465	0.858791	1490.69	13.9277	1613.42	9.84767	1777.48	11.3891	1777.48	11.3891	83.8651
-180713SWC3 Spot 58	344.545	1.16516e+06	3.10155	9.00658	0.670425	4.96677	1.25798	0.32458	1.06444	0.846154	1812.06	16.8146	1813.68	10.633	1815.54	12.1735	1815.54	12.1735	99.8083
-180713SWC3 Spot 22	262.398	36710.9	4.57818	8.95373	0.502946	5.00134	1.1326	0.324922	1.01481	0.895996	1813.72	16.0432	1819.55	9.58427	1826.21	9.12008	1826.21	9.12008	99.3158
-180713SWC3 Spot 40	219.536	107630	0.601872	8.88547	0.552638	5.23128	1.0874	0.337268	0.936498	0.861228	1873.51	15.2259	1857.73	9.26962	1840.08	10.0062	1840.08	10.0062	101.817
-180713SWC3 Spot 86	277.75	255865	1.27509	8.62799	0.607052	5.42801	1.30709	0.339812	1.15758	0.885611	1885.76	18.9262	1889.29	11.2078	1893.15	10.9195	1893.15	10.9195	99.61
-180713SWC3 Spot 61	174.974	98660.5	3.03179	6.80938	0.584922	8.94967	1.08561	0.442183	0.914559	0.842437	2360.41	18.0764	2332.88	9.91554	2308.87	10.0399	2308.87	10.0399	102.232
-180713SWC3 Spot 53	61.7366	25835.7	1.78536	5.58415	0.611961	12.5571	1.02121	0.508785	0.817539	0.800561	2651.44	17.7719	2647.01	9.60461	2643.61	10.1564	2643.61	10.1564	100.296
-180713SWC3 Spot 94	154.94	39948.2	1.88202	5.47866	0.571348	12.8978	1.02901	0.512719	0.855815	0.831689	2668.23	18.6991	2672.22	9.69687	2675.23	9.45676	2675.23	9.45676	99.7382
-180713SWC3 Spot 9	100.837	84135.5	3.79819	5.34031	0.546761	13.5631	0.943583	0.525548	0.769027	0.815007	2722.67	17.0784	2719.69	8.92332	2717.47	9.01411	2717.47	9.01411	100.191
-180713SWC3 Spot 66	77.6068	26626.4	2.28473	5.26418	0.617562	14.0103	1.07793	0.535138	0.883491	0.819616	2763.07	19.8536	2750.41	10.2163	2741.11	10.1559	2741.11	10.1559	100.801
-180713SWC3 Spot 79	102.483	53515.1	1.1398	5.25931	0.70172	14.0622	1.20808	0.536623	0.983383	0.814006	2769.3	22.1383	2753.91	11.4527	2742.63	11.5388	2742.63	11.5388	100.972
-180713SWC3 Spot 69	135.462	31819.8	2.93043	5.18851	0.640946	11.9824	0.937977	0.451103	0.684828	0.730112	2400.15	13.7239	2603.03	8.79067	2764.9	10.5208	2764.9	10.5208	86.8079
-180713SWC3 Spot 57	67.2245	25585	6.25286	5.09596	0.694582	14.0299	0.898704	0.518764	0.570284	0.634563	2693.94	12.5571	2751.73	8.51835	2794.4	11.3674	2794.4	11.3674	96.4048
-180713SWC3 Spot 91	85.9627	56522.6	22.8486	4.96803	1.69349	15.5772	3.05685	0.561514	2.54487	0.832516	2872.88	58.9945	2851.22	29.1744	2835.94	27.6179	2835.94	27.6179	101.303
-180713SWC3 Spot 55	27.4369	26262.3	3.12666	4.77005	0.445208	17.4159	1.05387	0.602777	0.955216	0.906386	3041.02	23.1582	2958.03	10.1201	2902.06	7.21864	2902.06	7.21864	104.788
-180713SWC3 Spot 77	88.4173	38916.9	1.51241	4.74048	0.513774	16.1427	1.04992	0.555249	0.915628	0.872091	2846.97	21.073	2885.29	10.0392	2912.13	8.32288	2912.13	8.32288	97.7623
Sample 180721FL1 - Devonian upper Sappington Formation
							Isotope ratios						Apparent ages (Ma)
Analysis	U	206Pb	U/Th	206Pb*	±	207Pb*	±	206Pb*	±	error	206Pb*	±	207Pb*	±	206Pb*	±	Best age	±	Conc
	(ppm)	204Pb		207Pb*	(%)	235U*	(%)	238U	(%)	corr.	238U*	(Ma)	235U	(Ma)	207Pb*	(Ma)	(Ma)	(Ma)	(%)
-180721FL1 Spot 82	168.624	3060.15	1.70523	19.5677	0.884614	0.437712	1.19931	0.0621464	0.809817	0.675236	388.666	3.05448	368.638	3.70749	244.57	20.3674	388.666	3.05448	NA
-180721FL1 Spot 28	401.249	875880	1.97601	17.6001	0.916128	0.493876	1.29399	0.0630696	0.913845	0.706224	394.266	3.49502	407.548	4.34376	483.533	20.2452	394.266	3.49502	NA
-180721FL1 Spot 29	313.665	31394.7	5.32943	18.1869	0.778739	0.481303	1.30488	0.0635131	1.04703	0.802397	396.955	4.03086	398.966	4.30503	410.609	17.4162	396.955	4.03086	NA
-180721FL1 Spot 109	236.678	19427.7	2.11773	18.1078	0.861136	0.490242	1.33491	0.0644115	1.02002	0.764108	402.398	3.97906	405.075	4.45902	420.345	19.2263	402.398	3.97906	95.7306
-180721FL1 Spot 68	373.309	15221	2.991	17.8437	0.903797	0.503401	1.58266	0.0651757	1.29921	0.820906	407.025	5.12464	414.002	5.38096	453.057	20.0643	407.025	5.12464	89.8397
-180721FL1 Spot 23	555.199	27617.8	1.30937	17.5867	0.690837	0.511441	1.1635	0.0652629	0.936202	0.804644	407.553	3.69741	419.417	3.99763	485.177	15.2515	407.553	3.69741	84.0008
-180721FL1 Spot 76	122.23	8853.4	1.52977	18.3875	1.56078	0.4932	1.8539	0.0658013	1.00045	0.539648	410.81	3.98175	407.089	6.21767	386.012	35.0443	410.81	3.98175	106.424
-180721FL1 Spot 15	102.175	3303.63	2.90087	15.3764	2.96131	0.607408	3.1606	0.0677677	1.10456	0.349479	422.693	4.51913	481.924	12.1276	774.526	62.3012	422.693	4.51913	54.5744
-180721FL1 Spot 103	92.4677	45990.1	1.87818	17.4093	0.968434	0.54806	1.40142	0.0692305	1.01297	0.722817	431.518	4.22804	443.725	5.0378	507.552	21.3206	431.518	4.22804	85.0194
-180721FL1 Spot 89	112.633	6650.85	1.62037	18.7571	2.09663	0.514659	2.23336	0.0700441	0.769442	0.344522	436.421	3.24687	421.577	7.70551	341.175	47.4589	436.421	3.24687	127.917
-180721FL1 Spot 51	304.628	16128.8	2.25153	17.8708	0.696029	0.5414	1.10391	0.0702022	0.856828	0.776177	437.373	3.62323	439.347	3.93702	449.68	15.4693	437.373	3.62323	97.2632
-180721FL1 Spot 11	506.043	38260.6	1.48755	17.8099	0.579375	0.561151	1.53827	0.0725152	1.42499	0.926359	451.291	6.21091	452.275	5.61436	457.3	12.8737	451.291	6.21091	98.6862
-180721FL1 Spot 59	123.989	10655.3	1.22691	17.7023	1.22717	0.567705	1.57685	0.0729191	0.990208	0.627967	453.718	4.33829	456.529	5.79806	470.706	27.1607	453.718	4.33829	96.3911
-180721FL1 Spot 85	180.444	9536.49	1.6319	18.0489	0.987896	0.562712	1.38263	0.0736928	0.967333	0.699632	458.366	4.27996	453.29	5.0553	427.61	22.0287	458.366	4.27996	107.192
-180721FL1 Spot 14	240.858	17375.9	2.4602	17.809	0.918626	0.580593	1.40649	0.0750239	1.06505	0.757241	466.352	4.79148	464.842	5.24591	457.392	20.379	466.352	4.79148	101.959
-180721FL1 Spot 38	190.622	9137.85	1.12601	18.0205	1.01468	0.573811	1.47175	0.0750281	1.06605	0.724344	466.377	4.79623	460.476	5.44859	431.122	22.6192	466.377	4.79623	108.178
-180721FL1 Spot 6	171.594	31325.2	2.67229	15.7979	1.74184	0.668085	1.90684	0.0765806	0.775912	0.40691	475.68	3.55797	519.547	7.75472	717.365	36.9897	475.68	3.55797	66.3094
-180721FL1 Spot 54	179.006	8934.66	1.24141	17.2722	0.874339	0.714666	1.29435	0.0895651	0.954395	0.737355	552.964	5.05745	547.513	5.47784	524.873	19.1603	552.964	5.05745	105.352
-180721FL1 Spot 57	128.55	9980.77	1.42944	13.9517	1.27606	1.54969	1.57888	0.156877	0.929801	0.588899	939.4	8.12795	950.369	9.74428	975.863	25.9921	975.863	25.9921	96.2635
-180721FL1 Spot 40	213.213	22886.6	1.36688	13.8821	0.734314	1.60027	1.18659	0.16119	0.932081	0.785514	963.384	8.34077	970.317	7.41503	986.07	14.9248	986.07	14.9248	97.6994
-180721FL1 Spot 47	113.644	630461	1.94398	13.8596	0.632498	1.60096	1.17059	0.160998	0.985003	0.841458	962.321	8.80532	970.586	7.31627	989.337	12.8609	989.337	12.8609	97.2693
-180721FL1 Spot 56	37.3092	14092.6	0.480383	13.819	0.931659	1.69904	1.16138	0.17036	0.693401	0.597052	1014.09	6.50655	1008.17	7.42343	995.302	18.9219	995.302	18.9219	101.888
-180721FL1 Spot 3	63.9443	12567.6	1.26226	13.8043	0.871054	1.67883	1.14751	0.168155	0.74703	0.650998	1001.94	6.9321	1000.54	7.30226	997.456	17.6782	997.456	17.6782	100.449
-180721FL1 Spot 44	125.775	14218	2.19392	13.7043	0.807839	1.76156	1.20282	0.175163	0.891168	0.740896	1040.5	8.56292	1031.42	7.79082	1012.21	16.3748	1012.21	16.3748	102.795
-180721FL1 Spot 2	92.0615	35457.2	1.08036	13.6973	0.65358	1.66176	1.22805	0.165155	1.03968	0.846613	985.361	9.5001	994.047	7.78493	1013.25	13.2466	1013.25	13.2466	97.248
-180721FL1 Spot 46	158.784	13752.3	2.63603	13.6394	0.565841	1.7181	1.04068	0.170032	0.87341	0.839266	1012.29	8.18219	1015.31	6.6794	1021.83	11.4528	1021.83	11.4528	99.0665
-180721FL1 Spot 35	279.003	33687.2	206.618	13.5938	0.648669	1.74126	1.1777	0.171748	0.982955	0.834641	1021.73	9.28773	1023.93	7.59601	1028.6	13.1157	1028.6	13.1157	99.332
-180721FL1 Spot 60	315.642	109352	4.08197	13.5169	0.515651	1.77057	1.23996	0.173651	1.12765	0.909428	1032.19	10.7555	1034.73	8.04618	1040.07	10.4273	1040.07	10.4273	99.243
-180721FL1 Spot 71	116.245	41878.7	3.10074	13.4922	0.850214	1.76204	1.23562	0.172498	0.896601	0.725628	1025.86	8.50336	1031.6	8.00404	1043.8	17.172	1043.8	17.172	98.2818
-180721FL1 Spot 19	154.727	52532	1.72051	13.4909	0.725524	1.8659	1.20007	0.182649	0.955918	0.796553	1081.43	9.517	1069.08	7.93362	1043.98	14.6557	1043.98	14.6557	103.587
-180721FL1 Spot 69	75.0077	8264.03	2.37944	13.451	0.982333	1.84446	1.32947	0.180017	0.895827	0.673824	1067.07	8.80982	1061.45	8.75362	1049.96	19.8176	1049.96	19.8176	101.63
-180721FL1 Spot 67	289.524	34250.3	2.52335	13.4377	0.623063	1.8846	1.21128	0.183751	1.03874	0.857559	1087.44	10.3943	1075.68	8.03555	1051.96	12.5735	1051.96	12.5735	103.373
-180721FL1 Spot 20	156.785	315559	3.0969	13.4355	0.48266	1.78129	0.954785	0.173651	0.823805	0.862817	1032.19	7.85743	1038.65	6.20911	1052.28	9.74297	1052.28	9.74297	98.0912
-180721FL1 Spot 18	279.884	31042	2.81032	13.3904	0.66832	1.79479	1.26779	0.174379	1.07733	0.849771	1036.19	10.3123	1043.57	8.26709	1059.06	13.4517	1059.06	13.4517	97.8411
-180721FL1 Spot 86	495.97	86664.4	1.62997	13.3902	0.527658	1.90176	0.977672	0.18477	0.823055	0.841852	1092.98	8.27454	1081.7	6.50613	1059.08	10.6203	1059.08	10.6203	103.201
-180721FL1 Spot 94	316.33	35509.3	2.41317	13.3689	0.55687	1.85464	1.10051	0.179905	0.949218	0.862527	1066.46	9.32998	1065.08	7.26004	1062.29	11.203	1062.29	11.203	100.392
-180721FL1 Spot 48	65.4203	15815.2	1.32625	13.351	0.908332	1.82512	1.4184	0.176805	1.0894	0.768047	1049.5	10.551	1054.53	9.30454	1064.98	18.2515	1064.98	18.2515	98.5465
-180721FL1 Spot 87	308.689	50202.2	13.482	13.2975	0.567663	1.76706	1.11439	0.170494	0.958972	0.860534	1014.83	9.00459	1033.44	7.22616	1073.05	11.3882	1073.05	11.3882	94.5746
-180721FL1 Spot 95	75.1251	9133.16	1.1477	13.2975	0.783336	1.91136	1.20187	0.184416	0.91153	0.758423	1091.05	9.14921	1085.06	8.01207	1073.06	15.715	1073.06	15.715	101.677
-180721FL1 Spot 61	405.145	159329	1.34657	13.2781	0.603949	1.8218	1.36045	0.175519	1.21905	0.89606	1042.45	11.7337	1053.33	8.91865	1075.99	12.1067	1075.99	12.1067	96.8823
-180721FL1 Spot 55	324.611	118870	3.0982	13.2318	0.557322	1.91233	1.36551	0.183599	1.2466	0.912919	1086.61	12.4655	1085.4	9.10455	1082.95	11.1719	1082.95	11.1719	100.338
-180721FL1 Spot 1	31.9247	3256.91	1.08142	13.2146	1.05865	1.93629	1.63871	0.185658	1.25086	0.763316	1097.81	12.6265	1093.72	10.9729	1085.6	21.2059	1085.6	21.2059	101.125
-180721FL1 Spot 9	172.447	250387	3.60268	12.9636	0.621017	2.06755	1.04168	0.194477	0.83632	0.802858	1145.58	8.77772	1138.12	7.1291	1123.9	12.3981	1123.9	12.3981	101.929
-180721FL1 Spot 52	275.844	48165.3	2.79956	12.9295	0.633613	2.06041	1.01652	0.193296	0.794883	0.781968	1139.21	8.30036	1135.76	6.94905	1129.15	12.6018	1129.15	12.6018	100.89
-180721FL1 Spot 13	37.3106	16901.6	1.21727	12.8661	0.963451	2.1119	1.43206	0.197154	1.05951	0.739851	1160.01	11.2481	1152.7	9.86855	1138.94	19.1577	1138.94	19.1577	101.85
-180721FL1 Spot 93	216.347	34527.4	3.60951	12.8202	0.733031	2.15458	1.21474	0.200422	0.968643	0.797405	1177.59	10.4254	1166.53	8.42454	1146.04	14.5654	1146.04	14.5654	102.753
-180721FL1 Spot 63	86.6974	21484	3.9049	12.8136	0.832118	2.14906	1.33331	0.199806	1.04177	0.781344	1174.28	11.1838	1164.75	9.23932	1147.09	16.5162	1147.09	16.5162	102.37
-180721FL1 Spot 66	157.548	15302.6	1.62956	12.7439	0.848963	2.12965	1.26617	0.196924	0.93939	0.741914	1158.78	9.96317	1158.47	8.74875	1157.89	16.85	1157.89	16.85	100.077
-180721FL1 Spot 80	219.976	175942	4.55195	12.7361	0.586896	2.19921	1.2671	0.203231	1.12299	0.886265	1192.65	12.2274	1180.79	8.84457	1159.11	11.649	1159.11	11.649	102.894
-180721FL1 Spot 49	208.564	37337.5	1.49099	12.697	0.734079	2.14346	1.11693	0.19747	0.841824	0.753693	1161.72	8.94905	1162.94	7.73344	1165.2	14.5641	1165.2	14.5641	99.7008
-180721FL1 Spot 104	56.6692	32755.1	3.29249	12.6752	0.826483	2.21191	1.19317	0.203427	0.860564	0.721245	1193.71	9.37759	1184.81	8.34342	1168.64	16.3862	1168.64	16.3862	102.145
-180721FL1 Spot 27	308.11	19948.2	1.56364	12.6109	0.590126	2.17686	1.13882	0.199189	0.973993	0.855265	1170.96	10.4292	1173.67	7.92367	1178.7	11.6884	1178.7	11.6884	99.3435
-180721FL1 Spot 8	63.6713	12368.3	1.4438	12.4852	0.929894	2.3282	1.44344	0.210914	1.104	0.76484	1233.68	12.396	1220.93	10.2531	1198.47	18.3177	1198.47	18.3177	102.938
-180721FL1 Spot 7	503.852	59719.6	2.94336	12.2954	0.532707	2.37865	1.02736	0.212207	0.878462	0.855066	1240.57	9.91346	1236.21	7.34426	1228.63	10.4661	1228.63	10.4661	100.972
-180721FL1 Spot 90	253.255	37153.2	2.66998	12.1263	0.477399	2.46089	0.956152	0.216525	0.828442	0.866434	1263.49	9.50534	1260.62	6.90348	1255.76	9.35407	1255.76	9.35407	100.615
-180721FL1 Spot 32	68.8362	25557.6	1.4802	11.9038	0.888888	2.50982	1.21394	0.216778	0.826759	0.681054	1264.83	9.49514	1274.88	8.81447	1291.85	17.2949	1291.85	17.2949	97.9086
-180721FL1 Spot 64	206.497	103167	6.29435	11.8836	0.977568	2.4356	1.5016	0.21001	1.13981	0.759064	1228.87	12.7527	1253.18	10.8095	1295.15	19.0104	1295.15	19.0104	94.8823
-180721FL1 Spot 98	248.023	139472	1.45716	11.781	0.540585	2.62031	1.14024	0.223988	1.00396	0.880473	1302.91	11.8435	1306.35	8.38001	1311.98	10.4869	1311.98	10.4869	99.3084
-180721FL1 Spot 107	39.8079	8066.8	3.03852	11.7394	0.725208	2.78157	1.01299	0.236933	0.707257	0.698191	1370.73	8.73323	1350.6	7.56587	1318.84	14.0563	1318.84	14.0563	103.934
-180721FL1 Spot 78	47.0689	18550.1	1.34786	11.7033	0.779314	2.70829	1.3065	0.22998	1.04862	0.802619	1334.39	12.6394	1330.73	9.68885	1324.82	15.0928	1324.82	15.0928	100.722
-180721FL1 Spot 79	98.8668	51969.4	1.68332	11.5594	0.748826	2.72795	1.21383	0.228802	0.955323	0.787032	1328.22	11.4669	1336.1	9.01914	1348.73	14.4545	1348.73	14.4545	98.4792
-180721FL1 Spot 97	349.2	9044.3	3.56632	11.3304	2.33051	2.72138	2.63455	0.223729	1.22866	0.466364	1301.55	14.4806	1334.31	19.5648	1387.25	44.7476	1387.25	44.7476	93.822
-180721FL1 Spot 99	261.724	140367	2.08317	11.126	0.643172	2.97842	1.36863	0.240444	1.20809	0.882699	1389.01	15.0958	1402.13	10.4042	1422.11	12.2892	1422.11	12.2892	97.6719
-180721FL1 Spot 91	719.151	452494	4.09634	11.0449	0.690711	3.116	1.3969	0.249717	1.21418	0.8692	1437.02	15.6401	1436.65	10.7382	1436.08	13.1726	1436.08	13.1726	100.065
-180721FL1 Spot 88	446.557	265481	2.91613	10.9706	0.66351	3.08176	1.09624	0.245311	0.872636	0.796027	1414.25	11.0813	1428.17	8.4042	1448.95	12.6318	1448.95	12.6318	97.6055
-180721FL1 Spot 41	121.889	32613.7	1.8518	10.856	0.571367	3.27448	1.06743	0.257929	0.901635	0.844679	1479.24	11.9177	1475.01	8.30306	1468.92	10.8484	1468.92	10.8484	100.702
-180721FL1 Spot 83	134.434	30256.7	1.9874	10.8338	3.77026	1.31281	4.00194	0.103198	1.34189	0.335309	633.122	8.09193	851.363	23.0695	1472.8	71.5706	1472.8	71.5706	42.9875
-180721FL1 Spot 65	47.6019	14457.8	2.49246	10.7549	0.942096	3.26583	1.3864	0.254852	1.01713	0.73365	1463.45	13.3165	1472.95	10.7776	1486.66	17.8451	1486.66	17.8451	98.4389
-180721FL1 Spot 102	140.779	20984.9	2.37602	10.6976	0.74287	3.45824	1.04011	0.268428	0.727998	0.699921	1532.82	9.93139	1517.75	8.19241	1496.78	14.0522	1496.78	14.0522	102.408
-180721FL1 Spot 81	199.259	47730.8	2.93275	10.5954	0.693264	3.47912	1.31151	0.26747	1.11331	0.848872	1527.95	15.1451	1522.49	10.3441	1514.9	13.0807	1514.9	13.0807	100.861
-180721FL1 Spot 22	79.0034	35211.7	3.08835	10.4975	0.680857	3.56126	1.19424	0.271255	0.981145	0.821563	1547.17	13.4957	1540.94	9.46789	1532.4	12.8169	1532.4	12.8169	100.964
-180721FL1 Spot 58	42.2671	88911.9	1.65815	10.4235	0.699159	3.62673	0.968642	0.274295	0.670407	0.692109	1562.57	9.30261	1555.41	7.70979	1545.7	13.1399	1545.7	13.1399	101.091
-180721FL1 Spot 0	193.258	117507	2.59508	10.3082	0.610322	3.5904	1.00062	0.268542	0.792934	0.792444	1533.4	10.8209	1547.41	7.94693	1566.58	11.4372	1566.58	11.4372	97.8817
-180721FL1 Spot 5	254.18	31090.4	11.3332	10.141	0.566219	3.88599	1.03494	0.285936	0.866314	0.837066	1621.19	12.4178	1610.78	8.35805	1597.17	10.57	1597.17	10.57	101.504
-180721FL1 Spot 31	127.233	38752.7	0.891391	10.1298	0.64006	3.48486	1.08524	0.256138	0.876399	0.807561	1470.05	11.5201	1523.79	8.56256	1599.23	11.9452	1599.23	11.9452	91.9224
-180721FL1 Spot 30	503.948	47828.6	1.02222	9.99143	0.52605	3.95578	1.44636	0.286779	1.34731	0.931514	1625.41	19.3566	1625.18	11.7232	1624.85	9.78333	1624.85	9.78333	100.035
-180721FL1 Spot 37	259.349	97175.4	2.47342	9.96351	0.595557	4.1207	1.16119	0.2979	0.996832	0.858458	1680.89	14.7493	1658.42	9.48828	1630.05	11.0688	1630.05	11.0688	103.119
-180721FL1 Spot 62	71.4614	34365.1	0.991167	9.86203	0.676396	4.15962	1.16054	0.297651	0.943051	0.812596	1679.65	13.9445	1666.1	9.50035	1649.06	12.5425	1649.06	12.5425	101.855
-180721FL1 Spot 101	92.5526	18753.8	1.87633	9.85157	0.691369	4.17908	1.18835	0.298727	0.966527	0.813338	1684.99	14.3314	1669.93	9.73675	1651.03	12.8152	1651.03	12.8152	102.057
-180721FL1 Spot 100	91.6011	38826.8	2.13013	9.76374	0.686918	4.28532	1.12463	0.303589	0.890463	0.791787	1709.08	13.3684	1690.54	9.25895	1667.61	12.7058	1667.61	12.7058	102.487
-180721FL1 Spot 92	1160.31	37039.6	3.75644	9.61492	0.636117	3.87154	1.13539	0.270095	0.940462	0.828315	1541.29	12.8926	1607.77	9.16231	1695.97	11.7236	1695.97	11.7236	90.8794
-180721FL1 Spot 17	240.004	58758.6	2.62058	9.57565	0.728722	4.49959	1.04592	0.312628	0.750277	0.717336	1753.63	11.5193	1730.9	8.68924	1703.51	13.4178	1703.51	13.4178	102.942
-180721FL1 Spot 73	305.795	93752.4	1.02198	9.57269	0.50968	4.45765	1.09226	0.309619	0.966053	0.884453	1738.83	14.7232	1723.12	9.05874	1704.08	9.38339	1704.08	9.38339	102.04
-180721FL1 Spot 26	168.711	36180.5	1.60223	9.49665	0.648569	4.30077	1.20866	0.29635	1.01992	0.843837	1673.18	15.0302	1693.51	9.95765	1718.75	11.9206	1718.75	11.9206	97.3489
-180721FL1 Spot 4	221.164	34365.7	4.7539	9.45424	0.53951	3.75465	3.33124	0.257563	3.28726	0.986798	1477.36	43.4023	1583.11	26.7169	1726.97	9.90583	1726.97	9.90583	85.5466
-180721FL1 Spot 33	714.869	133793	4.20236	9.3381	0.760156	4.27393	1.22752	0.289584	0.963826	0.785183	1639.45	13.9522	1688.35	10.101	1749.63	13.916	1749.63	13.916	93.7026
-180721FL1 Spot 105	349.241	535266	3.90466	9.18899	0.526617	4.89721	0.978464	0.326516	0.824662	0.842812	1821.47	13.0854	1801.78	8.25062	1779.05	9.60483	1779.05	9.60483	102.385
-180721FL1 Spot 21	199.45	21893.4	2.18963	9.18037	0.637777	4.9154	1.01799	0.327421	0.793439	0.779417	1825.87	12.6163	1804.9	8.58932	1780.75	11.6302	1780.75	11.6302	102.534
-180721FL1 Spot 39	248.921	93310.7	3.2822	9.09191	0.639891	4.77267	1.19808	0.31485	1.01289	0.845424	1764.53	15.6354	1780.1	10.0581	1798.39	11.6453	1798.39	11.6453	98.1169
-180721FL1 Spot 108	277.69	963797	2.38602	8.86374	0.52808	5.1276	1.15512	0.329776	1.02734	0.889381	1837.29	16.4238	1840.69	9.81506	1844.51	9.55451	1844.51	9.55451	99.6086
-180721FL1 Spot 10	92.5111	10794.6	222.811	8.82297	0.524512	5.17528	0.98143	0.331312	0.829513	0.845208	1844.74	13.3076	1848.56	8.35172	1852.85	9.4804	1852.85	9.4804	99.5619
-180721FL1 Spot 53	270.841	80696.4	2.67843	5.62467	0.599947	11.0983	1.16731	0.452939	1.00133	0.857815	2408.31	20.1229	2531.41	10.8734	2631.61	9.97131	2631.61	9.97131	91.5145
-180721FL1 Spot 25	14.7668	5335.83	2.71933	5.61563	1.07821	12.5397	1.41567	0.510945	0.917375	0.648015	2660.66	19.9982	2645.71	13.3136	2634.28	17.9131	2634.28	17.9131	101.001
-180721FL1 Spot 45	540.246	293940	2.06075	5.48088	0.704301	10.2034	1.46165	0.405773	1.28077	0.876251	2195.57	23.8319	2453.39	13.5174	2674.56	11.6582	2674.56	11.6582	82.0908
-180721FL1 Spot 16	101.529	54354.6	1.24379	5.43278	0.501562	13.4861	0.912223	0.531612	0.761963	0.835281	2748.24	17.049	2714.31	8.62336	2689.13	8.28767	2689.13	8.28767	102.198
-180721FL1 Spot 42	116.094	250556	0.802697	5.39334	0.702643	13.4374	1.20514	0.52585	0.979106	0.812444	2723.94	21.752	2710.89	11.3897	2701.17	11.602	2701.17	11.602	100.843
-180721FL1 Spot 72	176.709	126452	3.23006	5.36709	0.605796	11.9742	0.979573	0.466307	0.769789	0.785841	2467.35	15.7811	2602.39	9.18004	2709.22	9.99521	2709.22	9.99521	91.0721
-180721FL1 Spot 75	64.0084	23424.5	1.01638	5.04211	0.594497	15.0359	1.15385	0.550087	0.988909	0.857052	2825.53	22.6231	2817.52	10.9858	2811.78	9.71682	2811.78	9.71682	100.489
-180721FL1 Spot 36	91.0291	77503.1	1.55292	5.0329	0.667977	15.0538	1.25277	0.549734	1.05983	0.845989	2824.07	24.2355	2818.65	11.9286	2814.77	10.9149	2814.77	10.9149	100.33
-180721FL1 Spot 106	75.7254	1.50514e+07	3.84815	3.26291	0.613621	30.3793	1.11612	0.719234	0.932303	0.835309	3493.18	25.1427	3499.16	10.9721	3502.58	9.48421	3502.58	9.48421	99.7315
